# Supplementary material for: Computed ammonia affinity for evaluating Lewis acidity of organoboronates and organoboronamides
Source: Royal Society of Chemistry journal article supplement (doi:10.1039/d2ra07826k), 2023-01-01
Supplement: d2ra07826k1.pdf [file d2ra07826k1.pdf]

*Supplementary Information for*

**Computed ammonia affinity for evaluating Lewis acidity of organoboronates and organoboronamides**

Hideya Tanaka, Masaaki Nakamoto, and Hiroto Yoshida \*

*Graduate School of Advanced Science and Engineering, Hiroshima University, Higashi-Hiroshima 739-8526, Japan*  
*e-mail: yhiroto@hiroshima-u.ac.jp*

**Table of Contents**

|                                                        |     |
|--------------------------------------------------------|-----|
| 1. Computational details                               | S2  |
| 2. Optimized Cartesian coordinates and computed values | S6  |
| 3. Stability test of PhB(mdan) towards hydrolysis      | S82 |
| 4. Reference                                           | S83 |

## 1. Computational details

Fluoride adducts optimized at the M06-2X/def2-SVP level of theory

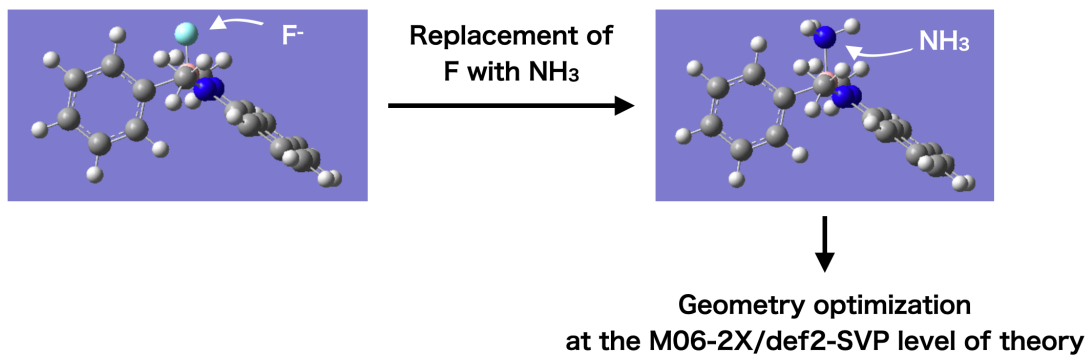

**Figure S1. Geometry optimizations of ammonia adducts.**

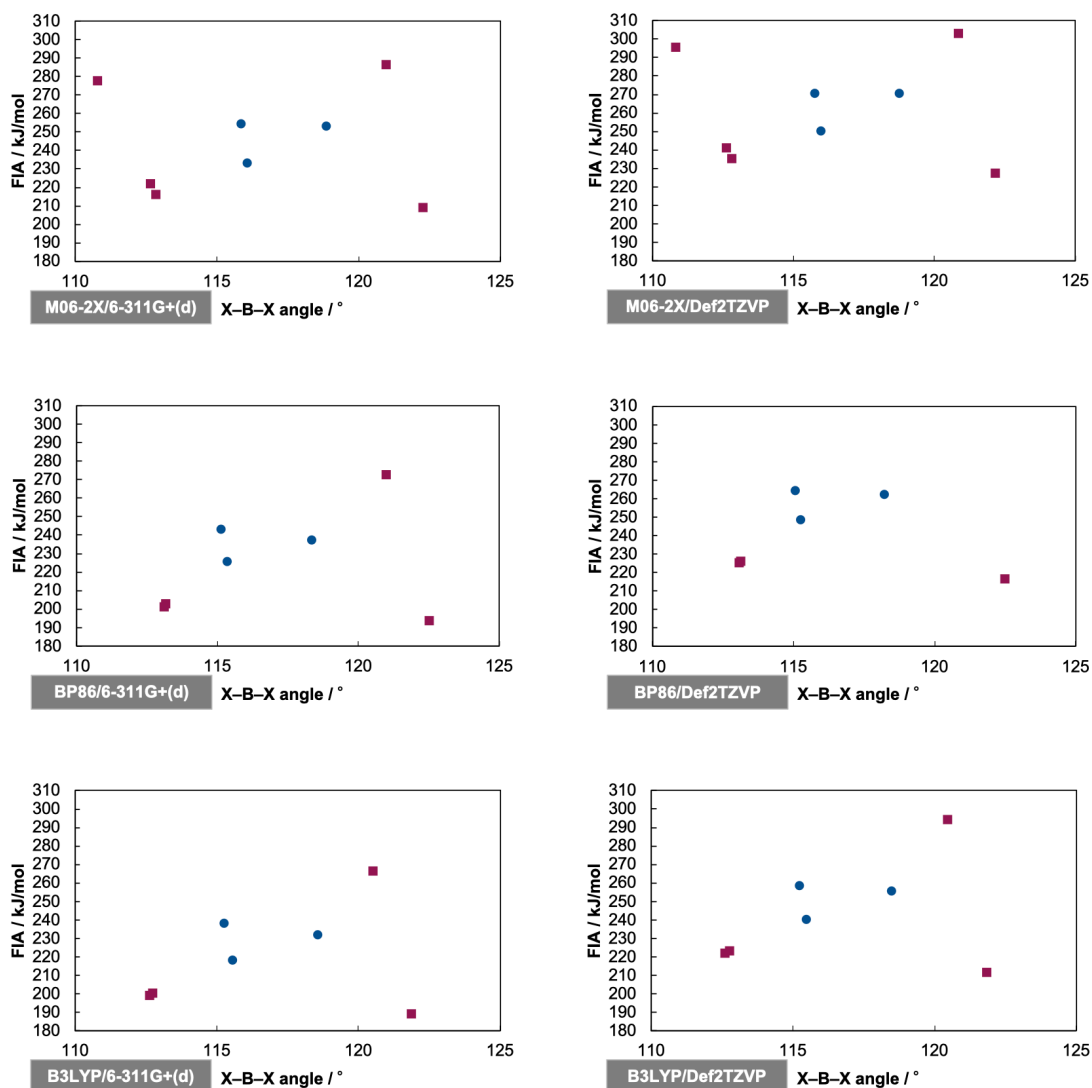

**Figure S2. FIA of organoboronic acid derivatives [B(dan), B(aam), B(mdan), B(neop), B(pin), B(eg), B(cat), B(nad)] at various levels of theory.**

X-B-X angle (M06-2X/def2-SVP)

●: PhB(dan), 116.1°; PhB(aam), 116.0°; PhB(mdan), 118.8°

■: PhB(neop), 121.9°; PhB(pin), 112.6°; PhB(eg), 112.8°; PhB(cat), 110.7°; PhB(nad), 120.6°

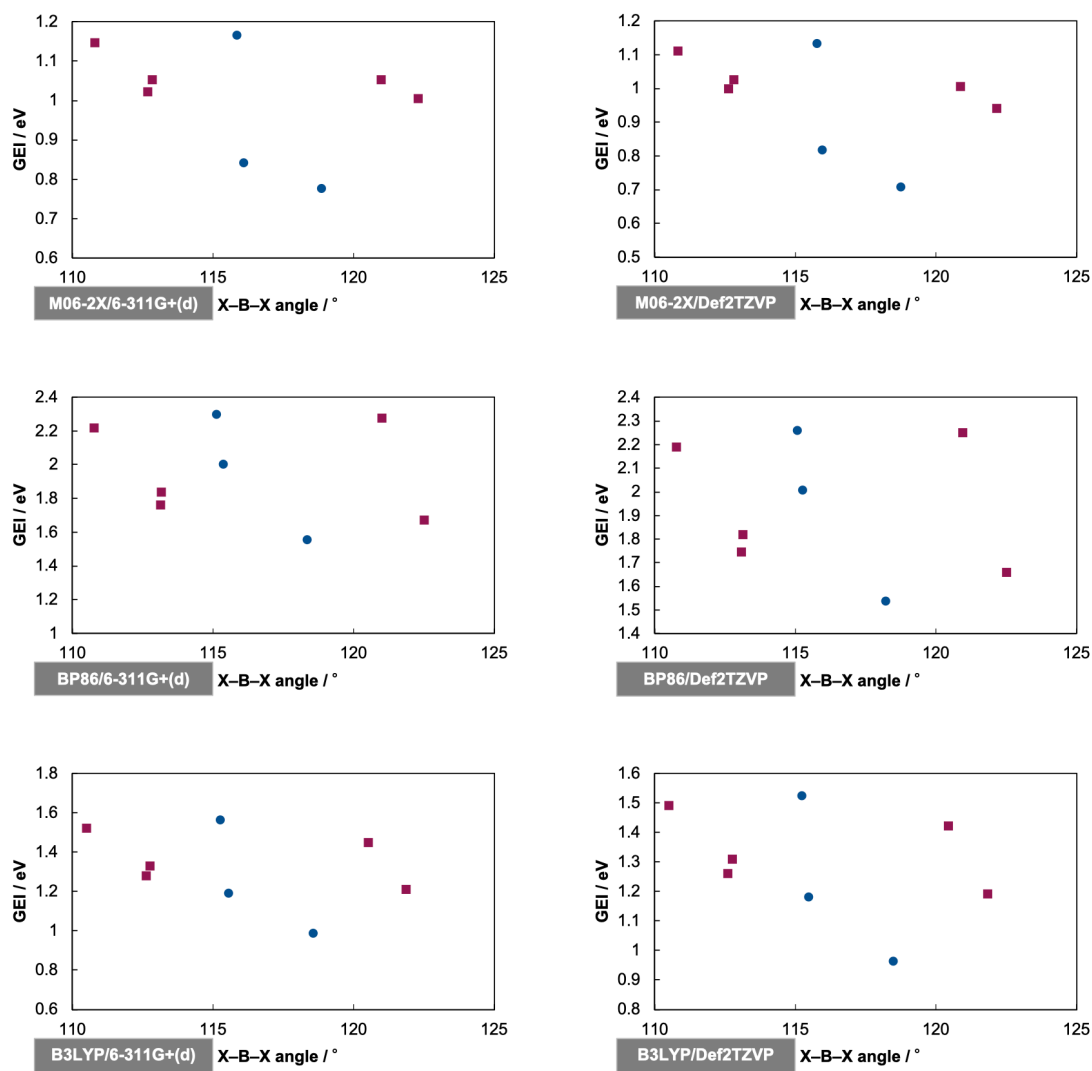

Figure S3. GEI of organoboronic acid derivatives [B(dan), B(aam), B(mdan), B(neop), B(pin), B(eg), B(cat), B(nad)] at various levels of theory.

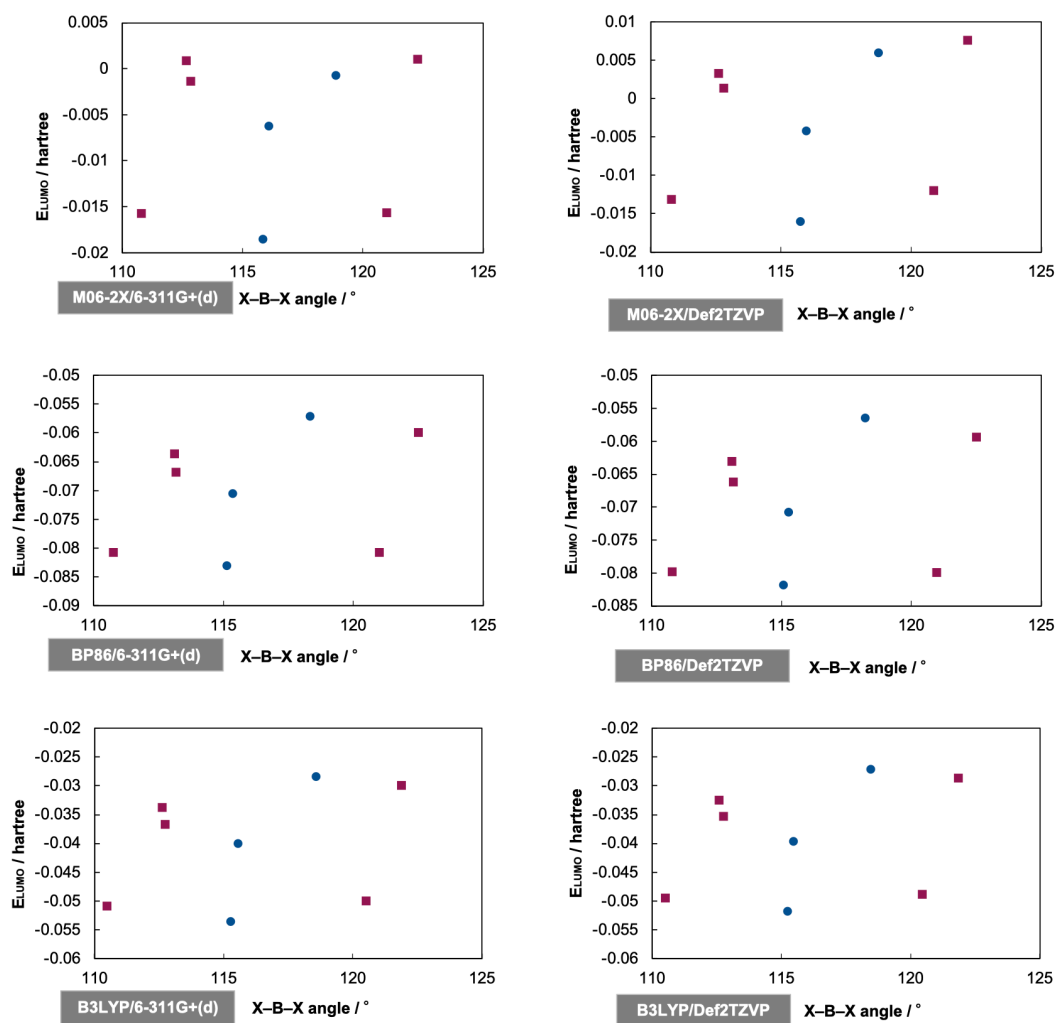

Figure S4.  $E_{LUMO}$  of organoboronic acid derivatives [B(dan), B(aam), B(mdan), B(neop), B(pin), B(eg), B(cat), B(nad)] at various levels of theory.

## 2. Optimized Cartesian coordinates and computed values

All calculations were conducted in the gas phase at 298 K.

E: Sum of electronic and zero-point energies

U: Sum of electronic and thermal energies

H: Sum of electronic and thermal enthalpies

G: Sum of electronic and thermal free energies

### COF<sub>2</sub>

Charge = 0; Multiplicity = 1

#### M06-2X/def2-SVP

E = -312.656551 (hartree)

U = -312.653300 (hartree)

H = -312.652355 (hartree)

G = -312.682329 (hartree)

|   |             |             |            |
|---|-------------|-------------|------------|
| C | -0.00000134 | 0.13920557  | 0.00000000 |
| F | 1.05688788  | -0.62737245 | 0.00000000 |
| O | -0.00001379 | 1.30720872  | 0.00000000 |
| F | -1.05687473 | -0.62739456 | 0.00000000 |

### COF<sub>3</sub><sup>-</sup>

Charge = -1; Multiplicity = 1

#### M06-2X/def2-SVP

E = -412.456855 (hartree)

U = -412.452879 (hartree)

H = -412.451935 (hartree)

G = -412.484015 (hartree)

|   |             |             |             |
|---|-------------|-------------|-------------|
| C | -0.18475616 | 0.00160128  | 0.00306444  |
| F | 0.43550080  | -1.05507231 | -0.69359079 |
| O | -1.40053248 | 0.01210656  | 0.02287082  |
| F | 0.45644853  | 1.11602840  | -0.57467659 |
| F | 0.47613920  | -0.07278499 | 1.24589480  |

### NH<sub>3</sub>

Charge = 0; Multiplicity = 1

M06-2X/def2-SVP

E = -56.438783 (hartree)

U = -56.435915 (hartree)

H = -56.434971 (hartree)

G = -56.456826 (hartree)

|   |             |             |             |
|---|-------------|-------------|-------------|
| N | 0.00000000  | 0.00000000  | 0.11994100  |
| H | 0.00000000  | 0.93767700  | -0.27986200 |
| H | -0.81205200 | -0.46883900 | -0.27986200 |
| H | 0.81205200  | -0.46883900 | -0.27986200 |

### –Phenylboronic acid derivatives–

#### PhB(dan)

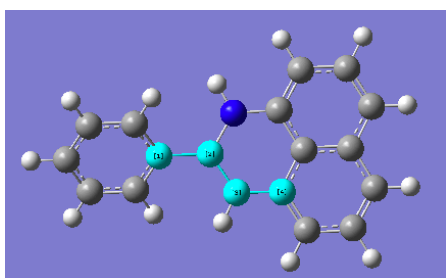

Charge = 0; Multiplicity = 1

M06-2X/def2-SVP

Dihedral angle = 180.0°

N–B–N angle = 116.1°

B–N bond: 1.42327 Å, 1.42327 Å

E = -750.904925 (hartree)

U = -750.891328 (hartree)

H = -750.890383 (hartree)

G = -750.945952 (hartree)

FIA = 277.4 (kJ/mol)

AA = 12.1 (kJ/mol)

HOMO: -0.22485 (hartree)

LUMO: -0.00010 (hartree)

GEI = 0.766 (eV)

|   |             |             |             |
|---|-------------|-------------|-------------|
| C | 4.67088200  | 1.05815100  | -0.57995500 |
| C | 5.37036500  | 0.00000000  | 0.00000100  |
| C | 4.67088100  | -1.05815200 | 0.57995600  |
| C | 3.27712100  | -1.05530500 | 0.57511200  |
| C | 2.55231800  | 0.00000000  | 0.00000000  |
| C | 3.27712100  | 1.05530500  | -0.57511200 |
| B | 0.98209100  | 0.00000000  | -0.00000100 |
| N | 0.22933400  | -1.20365600 | -0.10137200 |
| N | 0.22933400  | 1.20365700  | 0.10137100  |
| C | -1.16160800 | -1.24022200 | -0.10532400 |
| C | -1.16160900 | 1.24022300  | 0.10532400  |
| C | -1.86638600 | -2.42600200 | -0.21159600 |
| C | -3.27692700 | -2.41571700 | -0.21370400 |
| C | -3.97983200 | -1.23970200 | -0.11002700 |
| C | -3.29199600 | 0.00000000  | 0.00000000  |
| C | -1.86827600 | 0.00000000  | 0.00000000  |
| C | -3.97983200 | 1.23970100  | 0.11002800  |
| C | -3.27692700 | 2.41571700  | 0.21370400  |
| C | -1.86638600 | 2.42600200  | 0.21159700  |
| H | 5.21398200  | 1.88543300  | -1.03974200 |
| H | 6.46160100  | 0.00000000  | 0.00000100  |
| H | 5.21398100  | -1.88543300 | 1.03974200  |
| H | 2.74208300  | -1.88478000 | 1.04567600  |
| H | 2.74208500  | 1.88478000  | -1.04567700 |
| H | 0.69063900  | -2.09500200 | -0.23328700 |
| H | 0.69063900  | 2.09500200  | 0.23328700  |
| H | -1.32264800 | -3.36878600 | -0.29352200 |
| H | -3.81148100 | -3.36333300 | -0.29897700 |
| H | -5.07066800 | -1.23790200 | -0.11143700 |
| H | -5.07066800 | 1.23790100  | 0.11143700  |
| H | -3.81148100 | 3.36333300  | 0.29897800  |
| H | -1.32264900 | 3.36878700  | 0.29352200  |

### PhB(dan)-F<sup>-</sup>

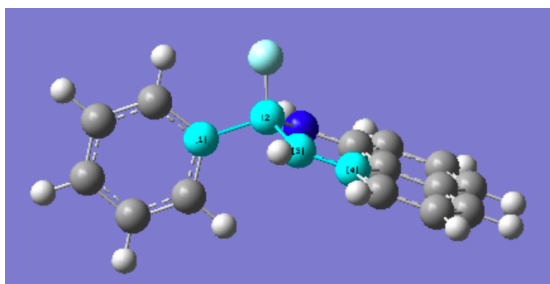



Charge = -1; Multiplicity = 1

[M06-2X/def2-SVP](#)

Dihedral angle = 139.9°

B-N bond: 1.52896 Å, 1.52896 Å

E = -850.732072 (hartree)

U = -850.716977 (hartree)

H = -850.716032 (hartree)

G = -850.775784 (hartree)

|   |             |             |             |
|---|-------------|-------------|-------------|
| C | 3.80528200  | -0.00013600 | -1.88169500 |
| C | 4.97882800  | -0.00006200 | -1.12322800 |
| C | 4.89151400  | 0.00004600  | 0.26839800  |
| C | 3.63990100  | 0.00008000  | 0.89114400  |
| C | 2.44797900  | 0.00000900  | 0.15403800  |
| C | 2.56437300  | -0.00010000 | -1.24522500 |
| B | 0.97632300  | 0.00005600  | 0.87363700  |
| N | 0.15998800  | -1.22095100 | 0.44884100  |
| N | 0.15998800  | 1.22100600  | 0.44867600  |
| C | -1.16479600 | -1.24280400 | 0.16808200  |
| C | -1.16481200 | 1.24282100  | 0.16798000  |
| C | -1.87648600 | -2.43972800 | -0.00956500 |
| C | -3.24506900 | -2.42315900 | -0.31609400 |
| C | -3.94207400 | -1.24211300 | -0.45889100 |
| C | -3.26644800 | -0.00002400 | -0.29904100 |
| C | -1.87699900 | -0.00000200 | 0.02049900  |
| C | -3.94209700 | 1.24204400  | -0.45896200 |
| C | -3.24511400 | 2.42311100  | -0.31623200 |
| C | -1.87652800 | 2.43972200  | -0.00971800 |
| F | 1.19312900  | 0.00015500  | 2.29042700  |
| H | 3.86295100  | -0.00022200 | -2.97342300 |
| H | 5.95427000  | -0.00008900 | -1.61589100 |
| H | 5.80419100  | 0.00010400  | 0.87064500  |
| H | 3.56849500  | 0.00016300  | 1.98178200  |
| H | 1.64731300  | -0.00015600 | -1.84284100 |
| H | 0.58860400  | -2.13289500 | 0.54511100  |
| H | 0.58858300  | 2.13296400  | 0.54491000  |
| H | -1.34569500 | -3.38820700 | 0.09980600  |
| H | -3.76647300 | -3.37643300 | -0.44259600 |
| H | -5.00712500 | -1.23918600 | -0.69891700 |
| H | -5.00714800 | 1.23908400  | -0.69898600 |
| H | -3.76653700 | 3.37636900  | -0.44278000 |
| H | -1.34575200 | 3.38821700  | 0.09959100  |

### PhB(dan)-NH<sub>3</sub>

The optimized structure of PhB(dan)-NH<sub>3</sub> obtained from the optimized structures of PhB(dan)-F was confirmed not to be local minima by verifying the presence of imaginary frequencies at the M06-2X/def2-SVP level of theory. Thus, we optimized the PhB(dan)-NH<sub>3</sub> structure starting from the following structure (Dihedral angle = 146.2°) at the M06-2X/def2-SVP level of theory and confirmed that the resulting structure have no imaginary frequency.

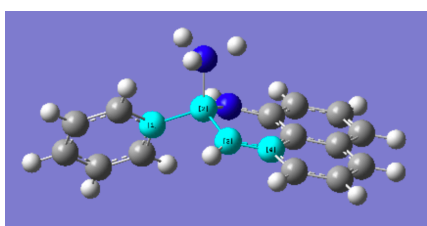

Dihedral angle = 146.2°

|   |             |             |             |
|---|-------------|-------------|-------------|
| C | 3.94290291  | -0.41921022 | -1.82711194 |
| C | 5.01611583  | 0.07867261  | -1.07594708 |
| C | 4.80886412  | 0.51090268  | 0.24092264  |
| C | 3.52840031  | 0.44524599  | 0.80662891  |
| C | 2.45518823  | -0.05264086 | 0.05546550  |
| C | 2.66243908  | -0.48486684 | -1.26140570 |
| B | 0.94757881  | -0.12994957 | 0.72152647  |
| N | 0.14727528  | -1.33437024 | 0.10394162  |
| N | 0.17260043  | 1.21239465  | 0.45686359  |
| C | -1.17604631 | -1.24177734 | -0.07127164 |
| C | -1.15179729 | 1.19676985  | 0.26665389  |
| C | -1.90773669 | -2.39862897 | -0.36620695 |
| C | -3.29915851 | -2.33368822 | -0.51808961 |
| C | -3.94842354 | -1.14903766 | -0.39943066 |
| C | -3.23601829 | 0.03137914  | -0.14244949 |
| C | -1.84491316 | -0.00598551 | 0.02735872  |
| C | -3.92455881 | 1.25086373  | -0.06686053 |
| C | -3.25198464 | 2.41024305  | 0.13930817  |
| C | -1.85997637 | 2.40427795  | 0.29936347  |
| H | 4.10114367  | -0.74922503 | -2.83257208 |
| H | 5.99377853  | 0.12880220  | -1.50787610 |
| H | 5.62828599  | 0.89104737  | 0.81445365  |
| H | 3.37015910  | 0.77526290  | 1.81208829  |
| H | 1.84301715  | -0.86501123 | -1.83493682 |
| H | 0.62700880  | -2.17414252 | -0.15029896 |

|   |             |             |             |
|---|-------------|-------------|-------------|
| H | 0.66931349  | 2.08013059  | 0.43924366  |
| H | -1.40306754 | -3.33619825 | -0.47190885 |
| H | -3.85299233 | -3.22457434 | -0.72901615 |
| H | -5.01245780 | -1.11400463 | -0.50668642 |
| H | -4.98878016 | 1.26708176  | -0.17672361 |
| H | -3.78775820 | 3.33554611  | 0.18006291  |
| H | -1.33682597 | 3.32523206  | 0.45120939  |
| H | 1.73946477  | -1.17324442 | 2.54604049  |
| H | 1.46017184  | 0.53194459  | 2.80564342  |
| H | 0.11069736  | -0.57694878 | 2.75726264  |
| N | 1.07574095  | -0.35700271 | 2.35079665  |

### PhB(dan)-NH<sub>3</sub>

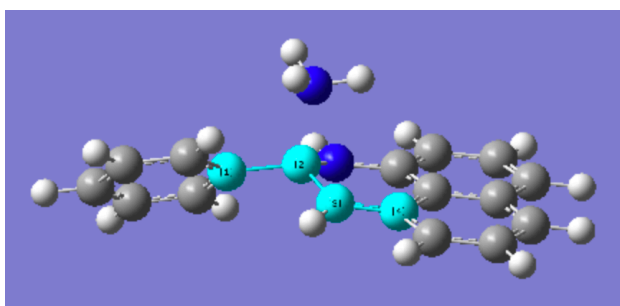

Charge = 0; Multiplicity = 1

### M06-2X/def2-SVP

Dihedral angle = 166.1°

B-N(dan) bond: 1.48265 Å, 1.48346 Å

E = -807.347306 (hartree)

U = -807.330904 (hartree)

H = -807.329960 (hartree)

G = -807.391424 (hartree)

|   |             |             |             |
|---|-------------|-------------|-------------|
| C | -4.42557000 | 1.04529400  | -1.07856500 |
| C | -5.26958300 | 0.07411400  | -0.54169600 |
| C | -4.73568600 | -0.92941100 | 0.26629000  |
| C | -3.36778000 | -0.94687800 | 0.53746300  |
| C | -2.49683200 | 0.02298000  | 0.01603700  |
| C | -3.05824600 | 1.01297800  | -0.80269400 |
| B | -0.92143200 | -0.01226500 | 0.30851100  |
| N | -0.15939700 | 1.23513600  | 0.05564300  |
| N | -0.18254700 | -1.20272500 | -0.17636800 |
| C | 1.21880900  | 1.24705700  | 0.02465900  |
| C | 1.19207400  | -1.23717100 | -0.24415400 |

|   |             |             |             |
|---|-------------|-------------|-------------|
| C | 1.95230900  | 2.42504000  | 0.10739700  |
| C | 3.35991800  | 2.39944900  | 0.07242000  |
| C | 4.04914800  | 1.21600900  | -0.04762900 |
| C | 3.34268900  | -0.01338200 | -0.15248400 |
| C | 1.91752200  | -0.00383900 | -0.09997600 |
| C | 4.02156100  | -1.24871700 | -0.33742100 |
| C | 3.30584700  | -2.41258800 | -0.49151600 |
| C | 1.89845200  | -2.41726300 | -0.44679400 |
| H | -4.83396300 | 1.82812500  | -1.72035800 |
| H | -6.33925400 | 0.09508400  | -0.75655700 |
| H | -5.38690000 | -1.69973400 | 0.68348400  |
| H | -2.97511800 | -1.75432500 | 1.16604300  |
| H | -2.40515200 | 1.76719500  | -1.24925800 |
| H | -0.59744300 | 2.14428600  | 0.13009200  |
| H | -0.66183100 | -2.06152900 | -0.41103400 |
| H | 1.42269400  | 3.37566400  | 0.19803800  |
| H | 3.90637000  | 3.34217600  | 0.14154500  |
| H | 5.13941400  | 1.20185800  | -0.08093800 |
| H | 5.11182100  | -1.25077700 | -0.37326200 |
| H | 3.83143600  | -3.35666300 | -0.64850100 |
| H | 1.34763800  | -3.35236100 | -0.56595800 |
| H | -1.24779000 | 0.61108800  | 2.58806000  |
| H | -1.22534700 | -1.04060100 | 2.45785600  |
| H | 0.18473600  | -0.18372900 | 2.32764500  |
| N | -0.81404900 | -0.17619100 | 2.10394500  |

### PhB(dan)-H<sub>2</sub>O

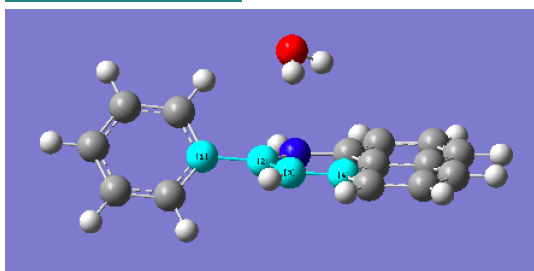

Charge = 0; Multiplicity = 1

### M06-2X/def2-SVP

Dihedral angle = -176.7°

H = -827.200263 (hartree)

|   |             |             |             |
|---|-------------|-------------|-------------|
| C | -4.68101900 | -0.93409800 | -0.96577200 |
| C | -5.33942900 | -0.02157100 | -0.14160500 |
| C | -4.60170400 | 0.86978100  | 0.63773000  |
| C | -3.20858000 | 0.85484500  | 0.58506300  |

|   |             |             |             |
|---|-------------|-------------|-------------|
| C | -2.52965000 | -0.05297700 | -0.24279200 |
| C | -3.28753200 | -0.95057400 | -1.00965700 |
| B | -0.96320400 | -0.05752300 | -0.27685400 |
| N | -0.20915200 | 1.12735500  | -0.50709900 |
| N | -0.20938400 | -1.25233700 | -0.07498300 |
| C | 1.17763200  | 1.17639300  | -0.44531100 |
| C | 1.18184300  | -1.28175500 | -0.03237400 |
| C | 1.88281500  | 2.35830700  | -0.59592400 |
| C | 3.29165600  | 2.35973600  | -0.52618100 |
| C | 3.99450200  | 1.19974900  | -0.30588600 |
| C | 3.30816700  | -0.03416900 | -0.13891900 |
| C | 1.88554600  | -0.04660400 | -0.20635600 |
| C | 3.99702100  | -1.25648400 | 0.09218700  |
| C | 3.29725200  | -2.42814000 | 0.25012500  |
| C | 1.88788400  | -2.45015700 | 0.19146900  |
| H | -5.25557600 | -1.63324600 | -1.57572400 |
| H | -6.43001500 | -0.00858700 | -0.10299400 |
| H | -5.11476100 | 1.57477500  | 1.29400500  |
| H | -2.62982200 | 1.52787300  | 1.22268100  |
| H | -2.78123500 | -1.66661600 | -1.66289900 |
| H | -0.67956500 | 2.00924200  | -0.66814600 |
| H | -0.67737200 | -2.13707500 | 0.07945400  |
| H | 1.33921500  | 3.28744900  | -0.77508900 |
| H | 3.82489500  | 3.30357900  | -0.65114200 |
| H | 5.08401100  | 1.20687700  | -0.25460900 |
| H | 5.08659700  | -1.24474400 | 0.14156300  |
| H | 3.83282600  | -3.36236300 | 0.42659400  |
| H | 1.34602200  | -3.38842800 | 0.32276300  |
| H | -0.26950000 | -0.32733600 | 2.31566500  |
| H | 0.40241100  | 1.00747800  | 2.10904600  |
| O | -0.35884900 | 0.60499100  | 2.54536100  |

### PhB(aam)

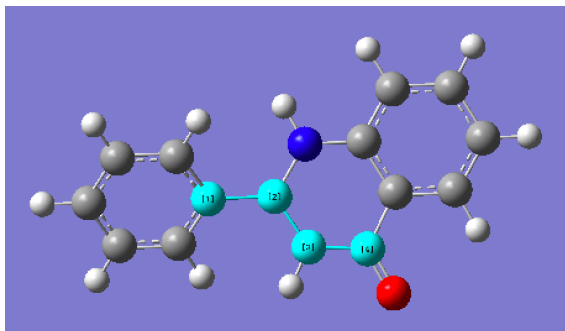

Charge = 0; Multiplicity = 1

[M06-2X/def2-SVP](#)

Dihedral angle = 179.9°

N–B–N angle = 116.0°

B–N bond: 1.42278 Å, 1.43187 Å

H = -710.681922 (hartree)

FIA = 294.0 (kJ/mol)

AA = 18.6 (kJ/mol)

HOMO: -0.27769 (hartree)

LUMO: -0.01041 (hartree)

GEI = 1.056 (eV)

|   |             |             |             |
|---|-------------|-------------|-------------|
| C | -4.37636700 | 0.78898400  | 0.53670800  |
| C | -4.94800500 | -0.38021100 | 0.03527700  |
| C | -4.13136800 | -1.38346700 | -0.48625200 |
| C | -2.74812200 | -1.21507500 | -0.50044800 |
| C | -2.15092700 | -0.04621400 | -0.00306400 |
| C | -2.99250300 | 0.95169000  | 0.51256200  |
| B | -0.59347100 | 0.13763800  | -0.02124300 |
| N | 0.29578800  | -0.96633400 | 0.10024800  |
| N | 0.01776300  | 1.42502100  | -0.16009500 |
| C | 1.67437300  | -0.82090700 | 0.09201900  |
| C | 1.38201100  | 1.67522800  | -0.18410200 |
| C | 2.52994300  | -1.92720300 | 0.22181500  |
| C | 3.90590700  | -1.75113000 | 0.21115000  |
| C | 4.46478000  | -0.47471600 | 0.07094800  |
| C | 3.62527100  | 0.62194700  | -0.05633500 |
| C | 2.23522900  | 0.46370300  | -0.04579700 |
| O | 1.82789000  | 2.79319000  | -0.31341100 |
| H | -5.01127800 | 1.57486800  | 0.94876500  |
| H | -6.03145800 | -0.50922300 | 0.04972900  |
| H | -4.57490400 | -2.29673100 | -0.88602100 |
| H | -2.12243900 | -2.00405400 | -0.92703500 |
| H | -2.55923600 | 1.86957600  | 0.91905100  |
| H | -0.05257600 | -1.90418000 | 0.25510800  |
| H | -0.53467800 | 2.26667700  | -0.29321500 |
| H | 2.10028100  | -2.92512300 | 0.33023400  |
| H | 4.55566600  | -2.62193900 | 0.31309300  |
| H | 5.54716600  | -0.34645600 | 0.06302700  |
| H | 4.01150900  | 1.63628700  | -0.16719000 |

## PhB(aam)-F<sup>-</sup>

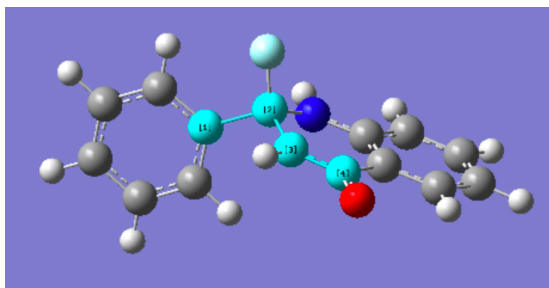

Charge = -1; Multiplicity = 1

M06-2X/def2-SVP

Dihedral angle = 138.2°

B-N bond: 1.53464 Å, 1.53226 Å

H = -810.513866 (hartree)

|   |             |             |             |
|---|-------------|-------------|-------------|
| C | 3.45742200  | -0.55146800 | -1.77400500 |
| C | 4.60501300  | -0.56349000 | -0.97699300 |
| C | 4.49033800  | -0.30303000 | 0.38798000  |
| C | 3.23730400  | -0.03407000 | 0.94619200  |
| C | 2.07101900  | -0.01693200 | 0.16943900  |
| C | 2.21453800  | -0.28192400 | -1.20173000 |
| B | 0.59846400  | 0.28523000  | 0.81889500  |
| N | -0.34073100 | -0.90594700 | 0.60251700  |
| N | -0.06437800 | 1.49384300  | 0.14434900  |
| C | -1.64369800 | -0.81768300 | 0.25581200  |
| C | -1.34920000 | 1.65770900  | -0.23673900 |
| C | -2.50979900 | -1.94195300 | 0.26125900  |
| C | -3.84047300 | -1.82743500 | -0.11088600 |
| C | -4.37681200 | -0.59675200 | -0.50879300 |
| C | -3.53679200 | 0.51376800  | -0.52685100 |
| C | -2.19714300 | 0.42577600  | -0.15494100 |
| O | -1.80892300 | 2.72046200  | -0.64840100 |
| F | 0.78570400  | 0.52926700  | 2.21614900  |
| H | 3.53695300  | -0.75273200 | -2.84557300 |
| H | 5.58179700  | -0.77367000 | -1.41957200 |
| H | 5.38279200  | -0.30899300 | 1.01972300  |
| H | 3.14453100  | 0.17200300  | 2.01551200  |
| H | 1.31857400  | -0.27179600 | -1.83052100 |
| H | -0.02568400 | -1.82394700 | 0.88876900  |
| H | 0.46725300  | 2.35494700  | 0.06787100  |
| H | -2.10579200 | -2.90939600 | 0.57100200  |
| H | -4.47514400 | -2.71765700 | -0.08965800 |

|   |             |             |             |
|---|-------------|-------------|-------------|
| H | -5.42486700 | -0.51283300 | -0.79993700 |
| H | -3.88723500 | 1.50044100  | -0.83674700 |

### PhB(aam)-NH<sub>3</sub>

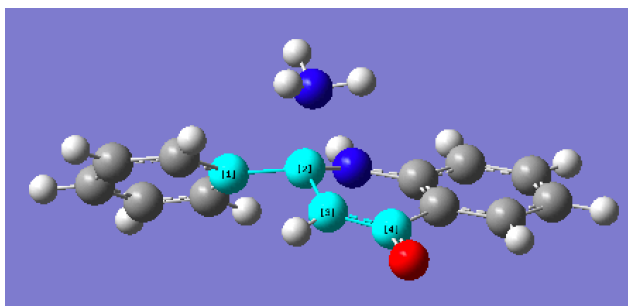

Charge = 0; Multiplicity = 1

### M06-2X/def2-SVP

Dihedral angle = 160.8°

B-N(aam) bond: 1.49524 Å, 1.48634 Å

H = -767.123979 (hartree)

|   |             |             |             |
|---|-------------|-------------|-------------|
| C | 3.90275300  | -1.41499600 | -0.94754000 |
| C | 4.86091500  | -0.51744700 | -0.47885700 |
| C | 4.45593400  | 0.60503800  | 0.24285200  |
| C | 3.10090000  | 0.81393400  | 0.49757800  |
| C | 2.11592100  | -0.07813200 | 0.04429600  |
| C | 2.55001500  | -1.19130000 | -0.68917200 |
| B | 0.55518500  | 0.17349900  | 0.31819500  |
| N | -0.34440300 | -0.99913400 | 0.16045900  |
| N | -0.03677700 | 1.39985700  | -0.29934600 |
| C | -1.70593800 | -0.84333500 | 0.05343900  |
| C | -1.37202700 | 1.61260500  | -0.51073800 |
| C | -2.59591400 | -1.92575400 | 0.20976400  |
| C | -3.96666300 | -1.73628500 | 0.11214400  |
| C | -4.50153600 | -0.46856100 | -0.14623200 |
| C | -3.63400300 | 0.60145300  | -0.31869000 |
| C | -2.24955400 | 0.43446200  | -0.21918200 |
| O | -1.82009500 | 2.66949400  | -0.91439600 |
| H | 4.21049700  | -2.29011000 | -1.52275400 |
| H | 5.91964700  | -0.68768000 | -0.68086100 |
| H | 5.19757800  | 1.31958700  | 0.60443300  |
| H | 2.81372800  | 1.71285600  | 1.05496500  |
| H | 1.80883600  | -1.89120500 | -1.08357200 |
| H | -0.01707700 | -1.94431000 | 0.31195800  |
| H | 0.54014400  | 2.18106500  | -0.59328000 |



|   |             |             |             |
|---|-------------|-------------|-------------|
| H | -2.18996600 | -2.91991500 | 0.41048400  |
| H | -4.63198600 | -2.59247200 | 0.23975500  |
| H | -5.57970800 | -0.32842000 | -0.22325500 |
| H | -3.99414500 | 1.60469600  | -0.55291400 |
| H | 0.87905800  | -0.22557700 | 2.62101900  |
| H | 0.93650100  | 1.40027100  | 2.30476500  |
| H | -0.51789500 | 0.61371400  | 2.29722200  |
| N | 0.47329600  | 0.52412800  | 2.05863800  |

### PhB(aam)-H<sub>2</sub>O

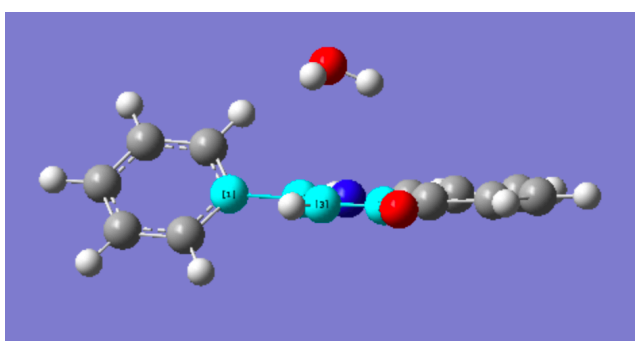

Charge = 0; Multiplicity = 1

M06-2X/def2-SVP

Dihedral angle = -176.7°

H = -786.991166 (hartree)

|   |             |             |             |
|---|-------------|-------------|-------------|
| C | 4.38174300  | 0.72202500  | -0.90615900 |
| C | 4.93533300  | -0.35449600 | -0.21312600 |
| C | 4.10506700  | -1.24318100 | 0.47012100  |
| C | 2.72301900  | -1.06112500 | 0.45114100  |
| C | 2.14840600  | 0.01395700  | -0.24522600 |
| C | 2.99980800  | 0.90529700  | -0.91555400 |
| B | 0.59404300  | 0.20037800  | -0.24817700 |
| N | -0.29292400 | -0.86974200 | -0.55112000 |
| N | -0.01907100 | 1.46463800  | 0.04598700  |
| C | -1.66664100 | -0.74667200 | -0.45899100 |
| C | -1.38294300 | 1.69983600  | 0.12851400  |
| C | -2.52232400 | -1.83944500 | -0.68449200 |
| C | -3.89612200 | -1.68573500 | -0.57645500 |
| C | -4.45711900 | -0.44611600 | -0.24148600 |
| C | -3.62063200 | 0.63619800  | -0.01665700 |
| C | -2.23069200 | 0.50105700  | -0.11961500 |
| O | -1.83428600 | 2.78962700  | 0.40208000  |
| H | 5.02912600  | 1.41957400  | -1.44008600 |

|   |             |             |             |
|---|-------------|-------------|-------------|
| H | 6.01714200  | -0.49772700 | -0.20107300 |
| H | 4.53746600  | -2.07746100 | 1.02496600  |
| H | 2.07501200  | -1.73459300 | 1.01766300  |
| H | 2.57686500  | 1.75062100  | -1.46539900 |
| H | 0.06710900  | -1.78957800 | -0.77323500 |
| H | 0.53869600  | 2.29014900  | 0.24464100  |
| H | -2.09146700 | -2.80790100 | -0.94563200 |
| H | -4.54391700 | -2.54555000 | -0.75521600 |
| H | -5.53837100 | -0.33588600 | -0.16006900 |
| H | -4.00832300 | 1.62231000  | 0.24363300  |
| H | 0.29820700  | 0.30539300  | 2.55605800  |
| H | -0.81644300 | -0.63298900 | 2.14738500  |
| O | 0.08069000  | -0.63239200 | 2.50430500  |

### PhB(aam)H<sup>+</sup>

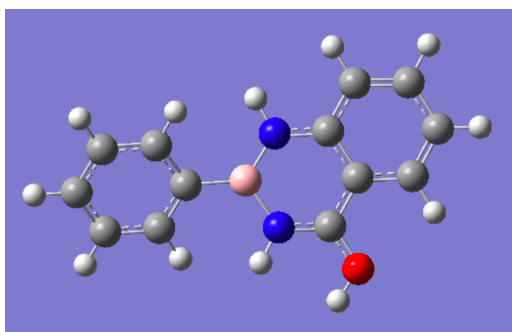

Charge = +1; Multiplicity = 1

### M06-2X/def2-SVP

H = -711.027612 (hartree)

AA = 79.3 (kJ/mol)

|   |             |             |             |
|---|-------------|-------------|-------------|
| C | 4.37443200  | 0.83700500  | -0.47148900 |
| C | 4.96557900  | -0.34262800 | -0.01811500 |
| C | 4.17074100  | -1.39458600 | 0.43897400  |
| C | 2.78486600  | -1.26627900 | 0.43937100  |
| C | 2.16809400  | -0.08499800 | -0.00828700 |
| C | 2.98821900  | 0.96304800  | -0.46138300 |
| B | 0.62855900  | 0.04996500  | -0.00141500 |
| N | -0.29547600 | -1.01832800 | -0.10256500 |
| N | -0.01719500 | 1.36984700  | 0.12499600  |
| C | -1.66200400 | -0.86586900 | -0.08769000 |
| C | -1.33267000 | 1.54802500  | 0.14799600  |
| C | -2.53041100 | -1.96564800 | -0.19862700 |
| C | -3.89806700 | -1.76718300 | -0.18128600 |

|   |             |             |             |
|---|-------------|-------------|-------------|
| C | -4.45415000 | -0.47751500 | -0.05396900 |
| C | -3.62266000 | 0.61340800  | 0.05456300  |
| C | -2.21893600 | 0.43238100  | 0.03759100  |
| H | 4.99568100  | 1.65541000  | -0.83668000 |
| H | 6.05179400  | -0.44287000 | -0.02156100 |
| H | 4.63417300  | -2.31392300 | 0.79832300  |
| H | 2.18032200  | -2.09505100 | 0.81771400  |
| H | 2.54871100  | 1.88930100  | -0.84474100 |
| H | 0.04251400  | -1.96828200 | -0.22808700 |
| H | 0.58228300  | 2.18595900  | 0.23919800  |
| H | -2.11534200 | -2.96960600 | -0.29735100 |
| H | -4.55987200 | -2.63027600 | -0.26799900 |
| H | -5.53575000 | -0.34828400 | -0.04247100 |
| H | -4.02579600 | 1.62108500  | 0.15359000  |
| O | -1.86530200 | 2.73376500  | 0.27594000  |
| H | -1.22859800 | 3.46100600  | 0.34670700  |

### PhB(aam)H<sup>+</sup>-NH<sub>3</sub>

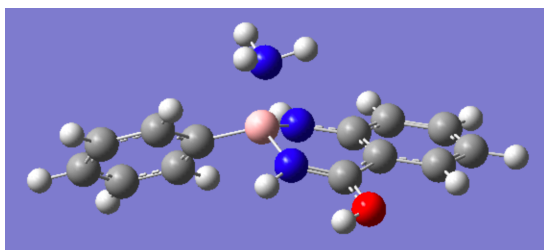

Charge = +1; Multiplicity = 1

### M06-2X/def2-SVP

H = -767.492776 (hartree)

|   |             |             |             |
|---|-------------|-------------|-------------|
| C | 3.81606000  | -1.35521100 | -1.12392200 |
| C | 4.80836300  | -0.50211000 | -0.64343400 |
| C | 4.46585100  | 0.54846500  | 0.20727300  |
| C | 3.13479200  | 0.73125200  | 0.57900500  |
| C | 2.11742900  | -0.11947300 | 0.11452800  |
| C | 2.48660800  | -1.15952000 | -0.75059200 |
| B | 0.58986600  | 0.11232800  | 0.50656400  |
| N | -0.35508400 | -1.02352000 | 0.30035500  |
| N | -0.02324600 | 1.37382800  | -0.15896200 |
| C | -1.69512400 | -0.85864900 | 0.12543100  |
| C | -1.30402300 | 1.49920100  | -0.42659600 |
| C | -2.60177700 | -1.94065300 | 0.19449200  |
| C | -3.95526700 | -1.73231200 | 0.02334500  |
| C | -4.48000100 | -0.44833600 | -0.23484000 |

|   |             |             |             |
|---|-------------|-------------|-------------|
| C | -3.61774900 | 0.61791700  | -0.34015400 |
| C | -2.22592000 | 0.43081700  | -0.16063600 |
| H | 4.07818800  | -2.17338600 | -1.79606600 |
| H | 5.84868500  | -0.65260200 | -0.93455500 |
| H | 5.23673900  | 1.22342400  | 0.58149800  |
| H | 2.90501400  | 1.57287100  | 1.24374900  |
| H | 1.72124600  | -1.82651100 | -1.15574400 |
| H | -0.02731100 | -1.98196500 | 0.34596000  |
| H | 0.61349600  | 2.08739700  | -0.50891500 |
| H | -2.21677200 | -2.94178700 | 0.39452600  |
| H | -4.63358600 | -2.58445300 | 0.09158100  |
| H | -5.55242400 | -0.30861400 | -0.36290400 |
| H | -3.98831400 | 1.61737200  | -0.56854400 |
| H | 0.96032200  | -0.33863700 | 2.66410900  |
| H | 1.10125700  | 1.28204300  | 2.42130300  |
| H | -0.40170500 | 0.58631200  | 2.50414700  |
| N | 0.55505100  | 0.45635000  | 2.16056800  |
| O | -1.79796200 | 2.58489900  | -0.97826800 |
| H | -1.14297200 | 3.28277300  | -1.12394800 |

### PhB(mdan)

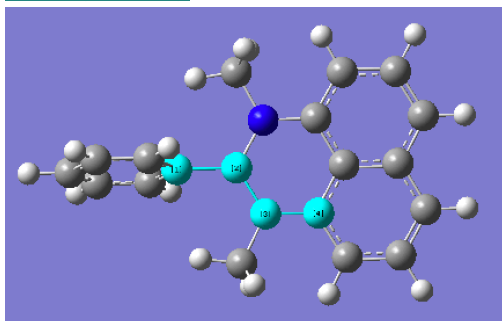

Charge = 0; Multiplicity = 1

M06-2X/def2-SVP

Dihedral angle = 179.3°

N–B–N angle = 118.8°

B–N bond: 1.43066 Å, 1.43067 Å

H = -829.337202 (hartree)

FIA = 301.8 (kJ/mol)

AA = 21.5 (kJ/mol)

HOMO: -0.22312 (hartree)

LUMO: 0.00971 (hartree)

GEI = 0.665 (eV)

|   |             |             |             |
|---|-------------|-------------|-------------|
| C | 4.56067500  | -0.35520300 | 1.15223800  |
| C | 5.26129800  | 0.00000000  | 0.00000100  |
| C | 4.56067500  | 0.35520300  | -1.15223600 |
| C | 3.16580600  | 0.35745000  | -1.14764800 |
| C | 2.44214700  | -0.00000400 | -0.00000100 |
| C | 3.16580600  | -0.35745100 | 1.14764900  |
| B | 0.85925900  | -0.00000400 | -0.00000100 |
| N | 0.13137700  | 1.23041000  | 0.05541300  |
| N | 0.13137100  | -1.23041600 | -0.05541500 |
| C | -1.26732000 | 1.24889400  | 0.04100000  |
| C | -1.26732500 | -1.24889200 | -0.04099800 |
| C | -1.98802600 | 2.43528900  | 0.07214700  |
| C | -3.39851500 | 2.41825700  | 0.06739900  |
| C | -4.09341900 | 1.23708300  | 0.03433200  |
| C | -3.39514800 | 0.00000400  | 0.00000200  |
| C | -1.96969400 | 0.00000300  | 0.00000100  |
| C | -4.09342200 | -1.23707200 | -0.03432900 |
| C | -3.39852200 | -2.41824900 | -0.06739800 |
| C | -1.98803300 | -2.43528400 | -0.07214800 |
| C | 0.80008900  | -2.51473500 | -0.15417900 |
| C | 0.80011200  | 2.51472200  | 0.15417300  |
| H | 5.10297900  | -0.63289000 | 2.05770500  |
| H | 6.35248400  | 0.00000100  | 0.00000200  |
| H | 5.10298000  | 0.63289200  | -2.05770100 |
| H | 2.62987700  | 0.64555400  | -2.05612200 |
| H | 2.62987500  | -0.64555500 | 2.05612200  |
| H | -1.47763900 | 3.39421400  | 0.09985700  |
| H | -3.93522100 | 3.36816600  | 0.09231500  |
| H | -5.18420200 | 1.22504600  | 0.03356500  |
| H | -5.18420600 | -1.22503300 | -0.03356200 |
| H | -3.93523000 | -3.36815600 | -0.09231700 |
| H | -1.47764600 | -3.39421000 | -0.09986100 |
| H | 1.88207100  | -2.36550900 | -0.20552100 |
| H | 0.57134200  | -3.14842000 | 0.71766500  |
| H | 0.47521100  | -3.05329600 | -1.05832600 |
| H | 1.88209100  | 2.36547800  | 0.20551100  |
| H | 0.57137100  | 3.14840800  | -0.71767100 |
| H | 0.47524600  | 3.05328800  | 1.05832100  |

## PhB(mdan)-F<sup>-</sup>

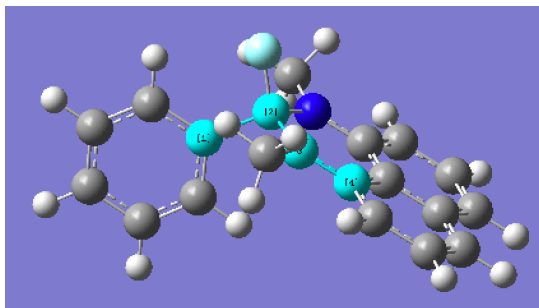

Charge = -1; Multiplicity = 1

M06-2X/def2-SVP

Dihedral angle = 118.2°

B-N bond: 1.53255 Å, 1.53255 Å

H = -929.172122 (hartree)

|   |             |             |             |
|---|-------------|-------------|-------------|
| C | 3.22388600  | 0.00000300  | 2.22504500  |
| C | 4.51515900  | 0.00000100  | 1.69052500  |
| C | 4.68067900  | -0.00000200 | 0.30619600  |
| C | 3.56147300  | -0.00000200 | -0.53195000 |
| C | 2.25612300  | 0.00000000  | -0.02167200 |
| C | 2.11798700  | 0.00000300  | 1.37577100  |
| B | 0.92151200  | 0.00000000  | -0.98233800 |
| N | 0.07246900  | 1.24780200  | -0.71621900 |
| N | 0.07246900  | -1.24780300 | -0.71621800 |
| C | -1.20331300 | 1.25168500  | -0.25283100 |
| C | -1.20331300 | -1.25168600 | -0.25283000 |
| C | -1.90296500 | 2.44489200  | 0.00259100  |
| C | -3.22220300 | 2.41918600  | 0.48467800  |
| C | -3.87981800 | 1.23650800  | 0.72685800  |
| C | -3.21711400 | 0.00000000  | 0.48609700  |
| C | -1.87910900 | 0.00000000  | -0.00214200 |
| C | -3.87981800 | -1.23650800 | 0.72685900  |
| C | -3.22220300 | -2.41918600 | 0.48468000  |
| C | -1.90296400 | -2.44489200 | 0.00259300  |
| F | 1.37553000  | -0.00000100 | -2.33819400 |
| C | 0.72197700  | -2.50803700 | -0.95661300 |
| C | 0.72197600  | 2.50803700  | -0.95661500 |
| H | 3.08373200  | 0.00000500  | 3.30912900  |
| H | 5.38551100  | 0.00000100  | 2.35120400  |
| H | 5.68711000  | -0.00000400 | -0.12129400 |
| H | 3.69021000  | -0.00000400 | -1.61814100 |
| H | 1.10864800  | 0.00000500  | 1.80166700  |

|   |             |             |             |
|---|-------------|-------------|-------------|
| H | -1.42286700 | 3.40508700  | -0.17146400 |
| H | -3.72984100 | 3.37017100  | 0.66991900  |
| H | -4.90527300 | 1.22219300  | 1.10132700  |
| H | -4.90527200 | -1.22219200 | 1.10132800  |
| H | -3.72984100 | -3.37017100 | 0.66992100  |
| H | -1.42286700 | -3.40508800 | -0.17146200 |
| H | 1.72881600  | -2.31746400 | -1.34802200 |
| H | 0.81601100  | -3.11334900 | -0.03445100 |
| H | 0.17528000  | -3.11838300 | -1.69906300 |
| H | 1.72881500  | 2.31746300  | -1.34802400 |
| H | 0.17527900  | 3.11838100  | -1.69906600 |
| H | 0.81601100  | 3.11334800  | -0.03445400 |

### PhB(mdan)-NH<sub>3</sub>

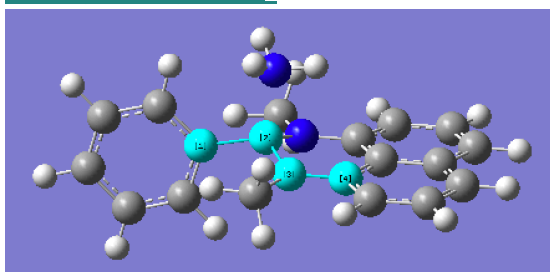

Charge = 0; Multiplicity = 1

M06-2X/def2-SVP

Dihedral angle = 167.5°

B-N(mdan) bond: 1.49835 Å, 1.49835 Å

H = -885.780344 (hartree)

|   |             |             |             |
|---|-------------|-------------|-------------|
| C | 4.16298400  | -0.00000300 | -1.61044500 |
| C | 5.14354600  | -0.00000100 | -0.61543600 |
| C | 4.76047300  | 0.00000200  | 0.72244200  |
| C | 3.40344900  | 0.00000300  | 1.05936300  |
| C | 2.40118400  | 0.00000100  | 0.08235200  |
| C | 2.81530000  | -0.00000300 | -1.26131300 |
| B | 0.81702400  | 0.00000100  | 0.36143400  |
| N | 0.10181000  | -1.24700900 | -0.06102800 |
| N | 0.10180900  | 1.24701000  | -0.06102900 |
| C | -1.27984700 | -1.25549900 | -0.10860500 |
| C | -1.27984800 | 1.25549900  | -0.10860600 |
| C | -2.01484700 | -2.44023300 | -0.15592100 |
| C | -3.42340800 | -2.41787800 | -0.18798300 |
| C | -4.11732600 | -1.23491400 | -0.17363100 |
| C | -3.41415800 | 0.00000000  | -0.14093400 |

|   |             |             |             |
|---|-------------|-------------|-------------|
| C | -1.98842500 | 0.00000000  | -0.09918100 |
| C | -4.11732600 | 1.23491300  | -0.17363300 |
| C | -3.42340900 | 2.41787700  | -0.18798500 |
| C | -2.01484800 | 2.44023200  | -0.15592300 |
| C | 0.77118900  | 2.52661300  | -0.07208900 |
| C | 0.77119000  | -2.52661200 | -0.07208800 |
| H | 4.45427300  | -0.00000500 | -2.66243000 |
| H | 6.20099200  | -0.00000100 | -0.88472300 |
| H | 5.51760600  | 0.00000400  | 1.50871000  |
| H | 3.14535700  | 0.00000500  | 2.12313800  |
| H | 2.05326700  | -0.00000400 | -2.04580900 |
| H | -1.50738600 | -3.40152600 | -0.16920100 |
| H | -3.96250800 | -3.36668900 | -0.22373300 |
| H | -5.20772400 | -1.21890600 | -0.20182900 |
| H | -5.20772400 | 1.21890400  | -0.20183000 |
| H | -3.96250900 | 3.36668800  | -0.22373500 |
| H | -1.50738700 | 3.40152600  | -0.16920400 |
| H | 1.85632100  | 2.37799200  | -0.06611400 |
| H | 0.51166600  | 3.10450500  | -0.97432000 |
| H | 0.49835300  | 3.15395300  | 0.79973200  |
| H | 1.85632200  | -2.37799000 | -0.06611300 |
| H | 0.49835500  | -3.15395200 | 0.79973500  |
| H | 0.51166800  | -3.10450500 | -0.97431800 |
| H | 0.98926200  | -0.83080500 | 2.57259100  |
| H | 0.98926300  | 0.83080800  | 2.57259100  |
| H | -0.40956500 | 0.00000200  | 2.25876300  |
| N | 0.60520100  | 0.00000100  | 2.11900400  |

### PhB(mdan)-H<sub>2</sub>O

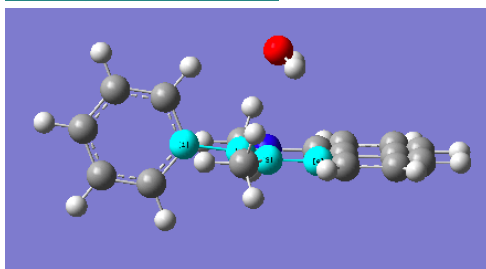

Charge = 0; Multiplicity = 1

### M06-2X/def2-SVP

Dihedral angle = -173.4°

H = -905.650709 (hartree)

|   |            |             |             |
|---|------------|-------------|-------------|
| C | 4.64704800 | -0.00029900 | -1.23759400 |
| C | 5.24530700 | -0.00002500 | 0.02222800  |



|   |             |             |             |
|---|-------------|-------------|-------------|
| C | 4.44865500  | 0.00028100  | 1.16728200  |
| C | 3.05807200  | 0.00031200  | 1.05430600  |
| C | 2.44136600  | 0.00002000  | -0.20732300 |
| C | 3.25621600  | -0.00026600 | -1.34873400 |
| B | 0.86500700  | 0.00002200  | -0.28787800 |
| N | 0.13479200  | -1.23250800 | -0.31448000 |
| N | 0.13473200  | 1.23249700  | -0.31455400 |
| C | -1.25960800 | -1.25068600 | -0.24718900 |
| C | -1.25966700 | 1.25064400  | -0.24736300 |
| C | -1.98012300 | -2.43766600 | -0.19456500 |
| C | -3.38812100 | -2.41964300 | -0.10901500 |
| C | -4.08159100 | -1.23762600 | -0.06986400 |
| C | -3.38462600 | -0.00005100 | -0.11468000 |
| C | -1.96186800 | -0.00003400 | -0.20523300 |
| C | -4.08163100 | 1.23751000  | -0.07009300 |
| C | -3.38821400 | 2.41955100  | -0.10945700 |
| C | -1.98021400 | 2.43761200  | -0.19497700 |
| C | 0.81073100  | 2.51675000  | -0.31934200 |
| C | 0.81080000  | -2.51674500 | -0.31938100 |
| H | 5.26598500  | -0.00053600 | -2.13657500 |
| H | 6.33300900  | -0.00004500 | 0.11116100  |
| H | 4.91321600  | 0.00050400  | 2.15496400  |
| H | 2.42944400  | 0.00055900  | 1.94922700  |
| H | 2.80028100  | -0.00048200 | -2.34258100 |
| H | -1.46957000 | -3.39659500 | -0.22371100 |
| H | -3.92404300 | -3.36953200 | -0.07258500 |
| H | -5.17017600 | -1.22537300 | -0.00225800 |
| H | -5.17021700 | 1.22522600  | -0.00248700 |
| H | -3.92418800 | 3.36941800  | -0.07322000 |
| H | -1.46967300 | 3.39654200  | -0.22428800 |
| H | 1.89176300  | 2.36244700  | -0.37600400 |
| H | 0.49288700  | 3.12270000  | -1.18220800 |
| H | 0.58462800  | 3.08686400  | 0.59706100  |
| H | 1.89182100  | -2.36244300 | -0.37629200 |
| H | 0.58495100  | -3.08685100 | 0.59709400  |
| H | 0.49274500  | -3.12272000 | -1.18214900 |
| H | -0.42465200 | 0.75416400  | 2.21189200  |
| H | -0.42395900 | -0.75398600 | 2.21174100  |
| O | 0.04610700  | 0.00028500  | 2.58872500  |

## PhB(neop)

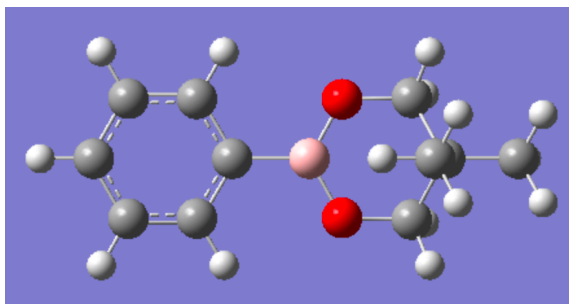

Charge = 0; Multiplicity = 1

M06-2X/def2-SVP

O–B–O angle = 121.9°

B–O bond: 1.36554 Å, 1.36554 Å

H = -602.650973 (hartree)

FIA = 252.8 (kJ/mol)

AA = 23.7 (kJ/mol)

HOMO: -0.29583 (hartree)

LUMO: 0.01213 (hartree)

GEI = 0.889 (eV)

|   |             |             |             |
|---|-------------|-------------|-------------|
| C | -1.55028000 | 0.00000000  | -0.12116100 |
| B | 0.00676800  | 0.00000000  | -0.28938200 |
| O | 0.66673900  | 1.19380100  | -0.35252500 |
| C | 2.07111300  | 1.22806300  | -0.49348300 |
| C | 2.74225900  | -0.00000100 | 0.12731800  |
| C | 2.07110900  | -1.22803800 | -0.49353100 |
| O | 0.66674000  | -1.19380200 | -0.35251300 |
| C | 2.54479000  | -0.00003000 | 1.64606700  |
| C | -2.26291800 | 1.20516000  | -0.04306500 |
| C | -3.64820400 | 1.20877400  | 0.10897400  |
| C | -4.34138900 | 0.00000000  | 0.18513600  |
| C | -3.64820500 | -1.20877400 | 0.10896700  |
| C | -2.26291800 | -1.20516000 | -0.04307200 |
| C | 4.22917500  | 0.00000500  | -0.21606800 |
| H | 2.43696600  | 2.14802100  | -0.01119000 |
| H | 2.32770800  | 1.28925600  | -1.56594000 |
| H | 2.43699400  | -2.14802000 | -0.01130900 |
| H | 2.32766600  | -1.28916000 | -1.56600200 |
| H | 1.48068900  | -0.00001400 | 1.92191300  |
| H | 3.00920500  | -0.89091900 | 2.09436400  |
| H | 3.00924300  | 0.89082000  | 2.09440100  |

|   |             |             |             |
|---|-------------|-------------|-------------|
| H | -1.71407600 | 2.14754400  | -0.10382100 |
| H | -4.19116200 | 2.15364100  | 0.16851500  |
| H | -5.42651100 | 0.00000000  | 0.30411500  |
| H | -4.19116300 | -2.15364100 | 0.16850300  |
| H | -1.71407700 | -2.14754300 | -0.10383400 |
| H | 4.72438300  | -0.88873300 | 0.20284200  |
| H | 4.39089700  | 0.00000600  | -1.30467900 |
| H | 4.72437700  | 0.88874600  | 0.20284200  |

### PhB(neop)-F<sup>-</sup>

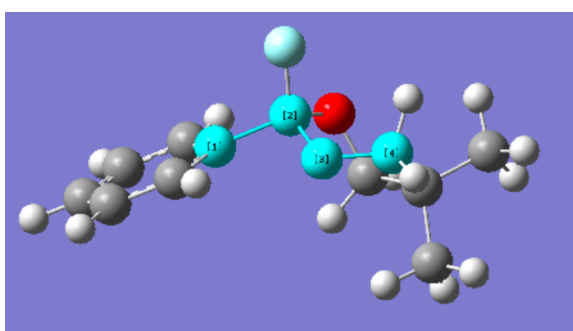

Charge = -1; Multiplicity = 1

M06-2X/def2-SVP

Dihedral angle = 156.6°

B-O bond: 1.47581 Å, 1.48081 Å

H = -702.467232 (hartree)

|   |             |             |             |
|---|-------------|-------------|-------------|
| C | 1.48174700  | -0.29395200 | -0.02137500 |
| B | -0.01932700 | -0.94616700 | -0.07481700 |
| O | -0.77969600 | -0.44952500 | -1.24443000 |
| C | -1.42711600 | 0.74029900  | -0.96372000 |
| C | -2.57745100 | 0.52813500  | 0.05251300  |
| C | -2.10128200 | -0.61384300 | 0.98505400  |
| O | -0.72766100 | -0.56934300 | 1.16385000  |
| C | -3.85155700 | 0.09502000  | -0.66732500 |
| C | 2.18518500  | -0.14871600 | 1.18422700  |
| C | 3.47360400  | 0.38688500  | 1.22605300  |
| C | 4.09618600  | 0.80451000  | 0.04757700  |
| C | 3.41319600  | 0.68327000  | -1.16334600 |
| C | 2.12462400  | 0.14398300  | -1.18800800 |
| C | -2.79903600 | 1.81234300  | 0.84629800  |
| F | 0.04953800  | -2.35460200 | -0.20105600 |
| H | -1.84135700 | 1.17392400  | -1.89587100 |
| H | -0.72404700 | 1.49250000  | -0.54459600 |

|   |             |             |             |
|---|-------------|-------------|-------------|
| H | -2.41409100 | -1.58228300 | 0.54441700  |
| H | -2.61269900 | -0.52261000 | 1.96396100  |
| H | -3.62099200 | -0.74279600 | -1.34315600 |
| H | -4.62216700 | -0.23923100 | 0.04869600  |
| H | -4.27665000 | 0.91942700  | -1.26409300 |
| H | 1.69136600  | -0.46030900 | 2.10897900  |
| H | 3.99732700  | 0.48617100  | 2.18130800  |
| H | 5.10425200  | 1.22664200  | 0.07426200  |
| H | 3.88864800  | 1.01515900  | -2.09094500 |
| H | 1.58026900  | 0.05762500  | -2.13301200 |
| H | -3.67778400 | 1.72963400  | 1.50776600  |
| H | -1.91305000 | 2.01701300  | 1.46677700  |
| H | -2.95798500 | 2.67472900  | 0.17605500  |

### PhB(neop)-NH<sub>3</sub>

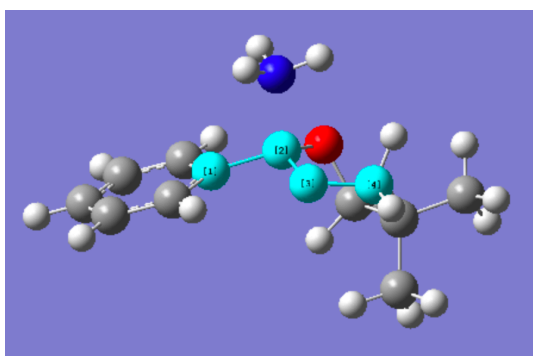

Charge = 0; Multiplicity = 1

M06-2X/def2-SVP

Dihedral angle = 156.5°

B-O bond: 1.43391 Å, 1.44128 Å

H = -659.094975 (hartree)

|   |             |             |             |
|---|-------------|-------------|-------------|
| C | -1.47520000 | 0.15521300  | 0.04231600  |
| B | 0.01804800  | 0.74774500  | 0.15840800  |
| O | 0.79121700  | 0.79326700  | -1.05708500 |
| C | 1.52399200  | -0.39581000 | -1.20593000 |
| C | 2.61239100  | -0.53112300 | -0.10976500 |
| C | 2.13409200  | 0.29210700  | 1.10563300  |
| O | 0.74656400  | 0.21913700  | 1.27462000  |
| C | 3.94367000  | 0.03886500  | -0.59701700 |
| C | -2.13681500 | -0.38674100 | 1.15372500  |
| C | -3.44750100 | -0.85563500 | 1.05878200  |
| C | -4.12310300 | -0.79396500 | -0.16091000 |
| C | -3.47991100 | -0.26859000 | -1.28177300 |

|   |             |             |             |
|---|-------------|-------------|-------------|
| C | -2.16922900 | 0.19922000  | -1.17528200 |
| C | 2.75800800  | -2.00237600 | 0.27609200  |
| H | 1.99025400  | -0.40344300 | -2.20420600 |
| H | 0.84144800  | -1.26609800 | -1.15473100 |
| H | 2.46278800  | 1.34460300  | 0.96649000  |
| H | 2.62426400  | -0.07411200 | 2.02237400  |
| H | 3.80270600  | 1.05608700  | -0.99432400 |
| H | 4.67921800  | 0.08805800  | 0.22205200  |
| H | 4.37069700  | -0.58557600 | -1.39647000 |
| H | -1.59898400 | -0.45488900 | 2.10342500  |
| H | -3.94386200 | -1.27827500 | 1.93480300  |
| H | -5.14751200 | -1.16289300 | -0.23953000 |
| H | -4.00047900 | -0.23104800 | -2.24093400 |
| H | -1.65681100 | 0.59295800  | -2.05849800 |
| H | 3.59377500  | -2.14762500 | 0.97802400  |
| H | 1.83410000  | -2.36065700 | 0.75443000  |
| H | 2.94947100  | -2.62564900 | -0.61178500 |
| H | -0.66255300 | 2.82154000  | -0.33987800 |
| H | -0.75981400 | 2.53193600  | 1.29510300  |
| H | 0.71903700  | 2.84448700  | 0.58184600  |
| N | -0.19037000 | 2.39509300  | 0.45918000  |

### PhB(neop)-H<sub>2</sub>O

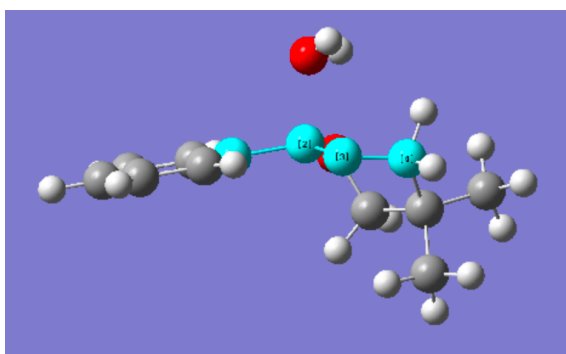

Charge = 0; Multiplicity = 1

M06-2X/def2-SVP

Dihedral angle = 165.9°

H = -678.943999 (hartree)

|   |             |             |             |
|---|-------------|-------------|-------------|
| C | -1.52969900 | 0.10101100  | 0.05569900  |
| B | -0.01390500 | 0.52912300  | 0.21680500  |
| O | 0.75100400  | 0.87325800  | -0.93016400 |
| C | 1.61486800  | -0.18284000 | -1.28791900 |
| C | 2.66733900  | -0.47000000 | -0.18596200 |

|   |             |             |             |
|---|-------------|-------------|-------------|
| C | 2.10271200  | 0.07850700  | 1.13977400  |
| O | 0.71163400  | -0.09872900 | 1.23972200  |
| C | 3.98160000  | 0.24874900  | -0.49027100 |
| C | -2.19795000 | -0.61224200 | 1.06006300  |
| C | -3.53272800 | -0.98739300 | 0.90960800  |
| C | -4.22095900 | -0.65632200 | -0.25817200 |
| C | -3.56921400 | 0.04566700  | -1.27271900 |
| C | -2.23463000 | 0.41723500  | -1.11329100 |
| C | 2.88708700  | -1.97899300 | -0.07962800 |
| H | 2.11413200  | 0.08416600  | -2.23171100 |
| H | 1.02022100  | -1.09539200 | -1.47844600 |
| H | 2.35781900  | 1.15507200  | 1.21478100  |
| H | 2.58187500  | -0.42701800 | 1.99231800  |
| H | 3.80197800  | 1.31717800  | -0.68692900 |
| H | 4.68376500  | 0.16819800  | 0.35474200  |
| H | 4.46952900  | -0.18475400 | -1.37610000 |
| H | -1.65333200 | -0.88266000 | 1.96817600  |
| H | -4.03888900 | -1.54347800 | 1.70111800  |
| H | -5.26526600 | -0.95023800 | -0.37972100 |
| H | -4.10387100 | 0.29938800  | -2.19013600 |
| H | -1.71803300 | 0.95883700  | -1.90987000 |
| H | 3.69991400  | -2.21102900 | 0.62543300  |
| H | 1.96930500  | -2.47403500 | 0.27136800  |
| H | 3.15537100  | -2.40717400 | -1.05807400 |
| H | 0.16073900  | 2.28506500  | 1.75332700  |
| H | 0.53591400  | 2.71845700  | 0.30453700  |
| O | -0.15166300 | 2.29091300  | 0.83770200  |

### PhB(pin)

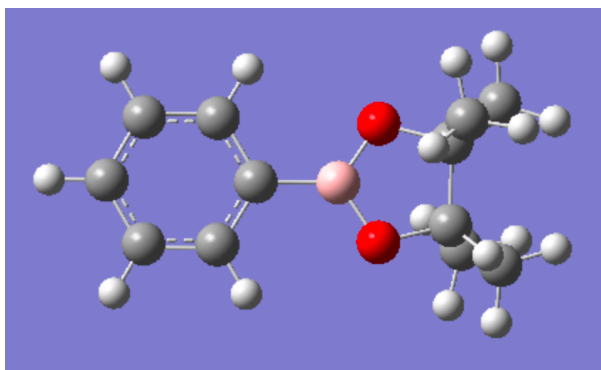

Charge = 0; Multiplicity = 1

M06-2X/def2-SVP

O–B–O angle = 112.6°

B–O bond: 1.36931 Å, 1.36931 Å

H = -641.895641 (hartree)

FIA = 265.6 (kJ/mol)

AA = 36.2 (kJ/mol)

HOMO: -0.30065 (hartree)

LUMO: 0.00806 (hartree)

GEI = 0.943 (eV)

|   |             |             |             |
|---|-------------|-------------|-------------|
| C | -3.78284500 | -1.19675900 | 0.17440400  |
| C | -4.47932000 | 0.00000000  | 0.00000000  |
| C | -3.78284500 | 1.19676000  | -0.17440400 |
| C | -2.38942000 | 1.19383200  | -0.17308500 |
| C | -1.67425600 | 0.00000000  | 0.00000000  |
| C | -2.38942000 | -1.19383200 | 0.17308500  |
| B | -0.11730900 | 0.00000100  | 0.00000300  |
| O | 0.64234200  | 1.11970500  | -0.21025200 |
| C | 2.00561500  | 0.77847200  | 0.09579300  |
| C | 2.00561400  | -0.77847200 | -0.09579500 |
| O | 0.64234100  | -1.11970400 | 0.21025300  |
| C | 2.25632800  | -1.19216500 | -1.54382900 |
| C | 2.93288800  | -1.53406900 | 0.84048500  |
| C | 2.25633100  | 1.19216000  | 1.54382800  |
| C | 2.93289000  | 1.53407200  | -0.84048600 |
| H | -4.32956600 | -2.13136300 | 0.31046400  |
| H | -5.57090700 | 0.00000000  | 0.00000000  |
| H | -4.32956600 | 2.13136400  | -0.31046400 |
| H | -1.83788600 | 2.12707100  | -0.30779200 |
| H | -1.83788700 | -2.12707000 | 0.30779200  |
| H | 1.60199200  | -0.63425700 | -2.22889100 |
| H | 3.30153100  | -1.02264000 | -1.83731400 |
| H | 2.02958100  | -2.26186000 | -1.64773600 |
| H | 2.86650300  | -2.61046100 | 0.63090500  |
| H | 3.97545100  | -1.21625500 | 0.69120800  |
| H | 2.65769600  | -1.37290800 | 1.88957400  |
| H | 1.60199400  | 0.63425100  | 2.22888800  |
| H | 3.30153300  | 1.02263100  | 1.83731100  |
| H | 2.02958600  | 2.26185500  | 1.64773800  |
| H | 3.97545300  | 1.21626000  | -0.69120700 |
| H | 2.65770000  | 1.37291300  | -1.88957400 |
| H | 2.86650100  | 2.61046300  | -0.63090300 |

## PhB(pin)-F<sup>-</sup>

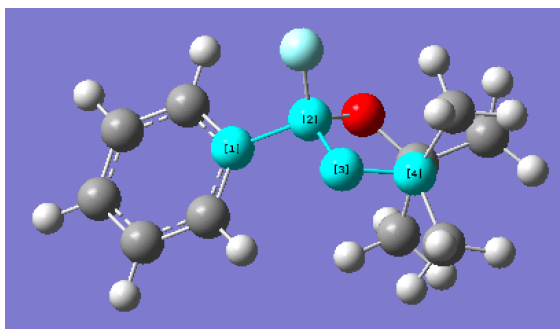

Charge = -1; Multiplicity = 1

M06-2X/def2-SVP

Dihedral angle = 140.3°

B-O bond: 1.47617 Å, 1.48314 Å

H = -741.716778 (hartree)

|   |             |             |             |
|---|-------------|-------------|-------------|
| C | -3.30392400 | 1.41370700  | -0.49695900 |
| C | -4.24639100 | 0.60220400  | 0.13489500  |
| C | -3.85683400 | -0.65503000 | 0.60303400  |
| C | -2.53971500 | -1.08498000 | 0.43801100  |
| C | -1.56859400 | -0.28538400 | -0.18572900 |
| C | -1.98781700 | 0.96934400  | -0.64999000 |
| B | -0.02108300 | -0.79486000 | -0.32938100 |
| O | 0.70671000  | -0.78624500 | 0.96288700  |
| C | 1.71956700  | 0.17450500  | 0.91395900  |
| C | 2.02241700  | 0.27736600  | -0.62072900 |
| O | 0.74836100  | 0.13220900  | -1.18236000 |
| C | 2.62391100  | 1.60843900  | -1.06076400 |
| C | 2.91905700  | -0.87698800 | -1.09216700 |
| C | 2.90419400  | -0.28572400 | 1.76014200  |
| C | 1.18009200  | 1.50219400  | 1.46641600  |
| F | -0.01426000 | -2.12078600 | -0.83775100 |
| H | -3.59889200 | 2.39734800  | -0.87373300 |
| H | -5.27717500 | 0.94400900  | 0.25957600  |
| H | -4.58827400 | -1.30162900 | 1.09633500  |
| H | -2.24576700 | -2.07524000 | 0.79800500  |
| H | -1.24765300 | 1.59860400  | -1.15301300 |
| H | 1.92344400  | 2.43121200  | -0.86542100 |
| H | 3.57375500  | 1.81323000  | -0.53991600 |
| H | 2.82016600  | 1.58085400  | -2.14351600 |
| H | 2.90211600  | -0.89448300 | -2.19195500 |
| H | 3.96161900  | -0.76824100 | -0.75171800 |



|   |            |             |             |
|---|------------|-------------|-------------|
| H | 2.50792200 | -1.83046200 | -0.73240800 |
| H | 3.20519700 | -1.30184700 | 1.47446700  |
| H | 3.76688900 | 0.39241200  | 1.65137900  |
| H | 2.60941100 | -0.30584600 | 2.82048900  |
| H | 1.95728700 | 2.27957900  | 1.54509200  |
| H | 0.36584000 | 1.86506300  | 0.82258500  |
| H | 0.76152500 | 1.31116600  | 2.46548000  |

### PhB(pin)-NH<sub>3</sub>

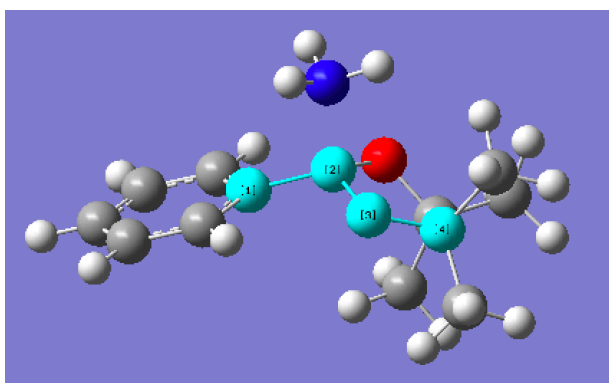

Charge = 0; Multiplicity = 1

M06-2X/def2-SVP

Dihedral angle = 138.9°

B-O bond: 1.43500 Å, 1.43962 Å

H = -698.344395 (hartree)

|   |             |             |             |
|---|-------------|-------------|-------------|
| C | 3.58867400  | -0.82734900 | 0.99677600  |
| C | 4.27107300  | 0.27053800  | 0.47079300  |
| C | 3.60156300  | 1.16524900  | -0.36440200 |
| C | 2.25756600  | 0.95394600  | -0.67627000 |
| C | 1.55623500  | -0.14833700 | -0.16764800 |
| C | 2.24502000  | -1.02913600 | 0.67910500  |
| B | 0.01862300  | -0.40587300 | -0.56489200 |
| O | -0.76325300 | 0.72212200  | -0.99941600 |
| C | -1.75720700 | 0.93125000  | -0.00555800 |
| C | -2.04203700 | -0.53169500 | 0.48107300  |
| O | -0.75881600 | -1.13549700 | 0.39555300  |
| C | -2.54737100 | -0.63780500 | 1.91236600  |
| C | -3.00383200 | -1.26509400 | -0.46001000 |
| C | -2.95182400 | 1.63888600  | -0.62657200 |
| C | -1.15798400 | 1.79070300  | 1.11027500  |
| H | 4.10548100  | -1.52140200 | 1.66284300  |

|   |             |             |             |
|---|-------------|-------------|-------------|
| H | 5.32139700  | 0.43369000  | 0.71942900  |
| H | 4.12847000  | 2.03325400  | -0.76610300 |
| H | 1.72615800  | 1.66768100  | -1.31283800 |
| H | 1.70431600  | -1.87596600 | 1.11224800  |
| H | -1.79593300 | -0.26110500 | 2.61664000  |
| H | -3.48158700 | -0.07108600 | 2.04487100  |
| H | -2.74434900 | -1.69147400 | 2.15713100  |
| H | -2.94996900 | -2.34279400 | -0.24860300 |
| H | -4.04367900 | -0.93402200 | -0.32610200 |
| H | -2.73609900 | -1.09169000 | -1.51400800 |
| H | -3.30262700 | 1.11482600  | -1.52460700 |
| H | -3.78227800 | 1.71162300  | 0.09194500  |
| H | -2.66106600 | 2.65720300  | -0.92081300 |
| H | -1.90666400 | 2.05855700  | 1.86971300  |
| H | -0.32562000 | 1.26439500  | 1.59989700  |
| H | -0.76184900 | 2.71343900  | 0.66351100  |
| H | 0.53524500  | -0.84579100 | -2.71439700 |
| H | 0.69810900  | -2.19997300 | -1.76807300 |
| H | -0.81958800 | -1.68332100 | -2.22513700 |
| N | 0.11661500  | -1.38094600 | -1.95167900 |

### PhB(pin)-H<sub>2</sub>O

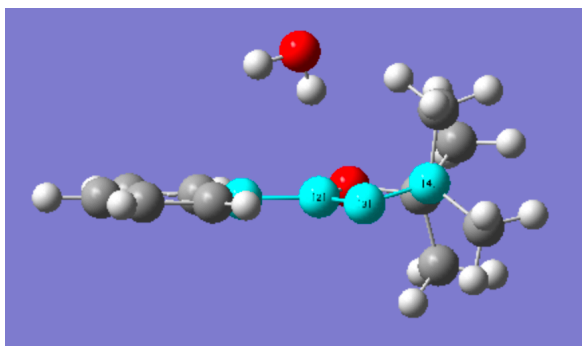

Charge = 0; Multiplicity = 1

M06-2X/def2-SVP

Dihedral angle = -166.2°

H = -718.210221 (hartree)

|   |            |             |             |
|---|------------|-------------|-------------|
| C | 3.74879200 | -1.31754800 | -0.21230800 |
| C | 4.44385500 | -0.17669000 | 0.19193000  |
| C | 3.74661300 | 0.95106900  | 0.62782100  |
| C | 2.35332500 | 0.93371700  | 0.66044600  |
| C | 1.63938500 | -0.20468000 | 0.25561100  |
| C | 2.35555200 | -1.32822700 | -0.18198500 |

|   |             |             |             |
|---|-------------|-------------|-------------|
| B | 0.08180000  | -0.20258200 | 0.25205100  |
| O | -0.65691000 | 0.91924600  | 0.54209500  |
| C | -2.04750700 | 0.53160100  | 0.56007900  |
| C | -2.03613800 | -0.80071400 | -0.27369100 |
| O | -0.68987100 | -1.27771600 | -0.07088400 |
| C | -3.01427900 | -1.85601700 | 0.21283100  |
| C | -2.19837300 | -0.56444400 | -1.77304400 |
| C | -2.87501200 | 1.64888400  | -0.05217100 |
| C | -2.42567400 | 0.31699600  | 2.02207000  |
| H | 4.29645900  | -2.19739900 | -0.55376800 |
| H | 5.53495800  | -0.16590600 | 0.16627100  |
| H | 4.29193000  | 1.84158100  | 0.94446800  |
| H | 1.80337100  | 1.81280900  | 1.00615200  |
| H | 1.80457900  | -2.21507400 | -0.50274100 |
| H | -2.80598900 | -2.15242900 | 1.24781900  |
| H | -4.04650000 | -1.48116500 | 0.14897700  |
| H | -2.93205500 | -2.74792800 | -0.42296700 |
| H | -1.99838900 | -1.50976400 | -2.29608800 |
| H | -3.21903700 | -0.23940300 | -2.01856700 |
| H | -1.47981000 | 0.18752300  | -2.13079300 |
| H | -2.50031200 | 1.92002500  | -1.04735100 |
| H | -3.92791000 | 1.34345600  | -0.14142900 |
| H | -2.82726300 | 2.53758900  | 0.59225400  |
| H | -3.49130200 | 0.07239500  | 2.12968100  |
| H | -1.83037800 | -0.49368300 | 2.46576100  |
| H | -2.21793400 | 1.24046300  | 2.57937500  |
| H | 0.04086900  | 1.90305100  | -1.12819000 |
| H | 1.19364200  | 1.36619900  | -1.94827300 |
| O | 0.31663400  | 1.75683000  | -2.04325900 |

### PhB(eg)

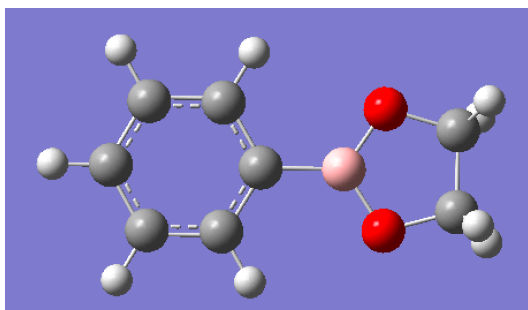

Charge = 0; Multiplicity = 1

M06-2X/def2-SVP

O–B–O angle = 112.8°

B–O bond: 1.36835 Å, 1.36835 Å

H = -484.935047 (hartree)

FIA = 258.4 (kJ/mol)

AA = 36.3 (kJ/mol)

HOMO: -0.30237 (hartree)

LUMO: 0.00641 (hartree)

GEI = 0.965 (eV)

|   |             |             |             |
|---|-------------|-------------|-------------|
| C | 2.68979400  | -1.20934100 | 0.01237600  |
| C | 3.38612400  | 0.00000000  | -0.00002000 |
| C | 2.68979400  | 1.20934100  | -0.01239400 |
| C | 1.29640200  | 1.20649800  | -0.01200100 |
| C | 0.58180600  | 0.00000100  | 0.00002100  |
| C | 1.29640100  | -1.20649700 | 0.01202000  |
| B | -0.97357200 | 0.00000100  | 0.00006100  |
| O | -1.73097000 | 1.13928300  | -0.02739900 |
| C | -3.09834000 | 0.77067900  | 0.06525700  |
| C | -3.09833600 | -0.77067900 | -0.06529500 |
| O | -1.73097000 | -1.13928400 | 0.02740600  |
| H | 3.23633400  | -2.15381200 | 0.02206400  |
| H | 4.47770900  | -0.00000100 | -0.00003500 |
| H | 3.23633500  | 2.15381100  | -0.02209300 |
| H | 0.74551300  | 2.14969900  | -0.02121300 |
| H | 0.74551200  | -2.14969800 | 0.02125600  |
| H | -3.49924200 | 1.10628400  | 1.03370700  |
| H | -3.67071000 | 1.26344800  | -0.73269100 |
| H | -3.49920600 | -1.10627500 | -1.03376200 |
| H | -3.67073400 | -1.26345700 | 0.73262800  |

### PhB(eg)-F<sup>-</sup>

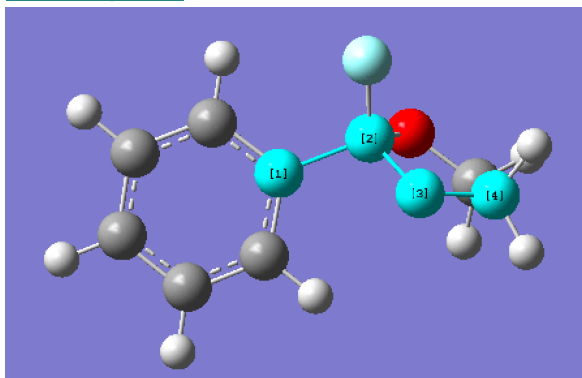

Charge = -1; Multiplicity = 1

M06-2X/def2-SVP

Dihedral angle = 140.9°

B–O bond: 1.47626 Å, 1.48356 Å

H = -584.753477 (hartree)

|   |             |             |             |
|---|-------------|-------------|-------------|
| C | 2.46897000  | -1.46343400 | -0.13144700 |
| C | 3.40769200  | -0.45942700 | 0.11413400  |
| C | 2.97272700  | 0.86052600  | 0.24517800  |
| C | 1.61379100  | 1.16330900  | 0.13511900  |
| C | 0.64859300  | 0.17315700  | -0.10027800 |
| C | 1.11423900  | -1.14303100 | -0.23737300 |
| B | -0.94836500 | 0.51784300  | -0.16413100 |
| O | -1.60812300 | 0.33890300  | 1.15255500  |
| C | -2.57159500 | -0.65019900 | 1.04106500  |
| C | -2.86324900 | -0.73421100 | -0.46321100 |
| O | -1.64129000 | -0.43627300 | -1.05231600 |
| F | -1.12106900 | 1.86150600  | -0.58730300 |
| H | 2.79965600  | -2.49999000 | -0.24553800 |
| H | 4.47018800  | -0.70308400 | 0.19714000  |
| H | 3.70007500  | 1.65646800  | 0.43012100  |
| H | 1.27683300  | 2.19983200  | 0.22462400  |
| H | 0.37967200  | -1.92531400 | -0.44865600 |
| H | -2.19635600 | -1.63484400 | 1.40384500  |
| H | -3.47613900 | -0.41082100 | 1.63444600  |
| H | -3.64747900 | 0.00596100  | -0.73672100 |
| H | -3.22669700 | -1.73215100 | -0.77391600 |

### PhB(eg)–NH<sub>3</sub>

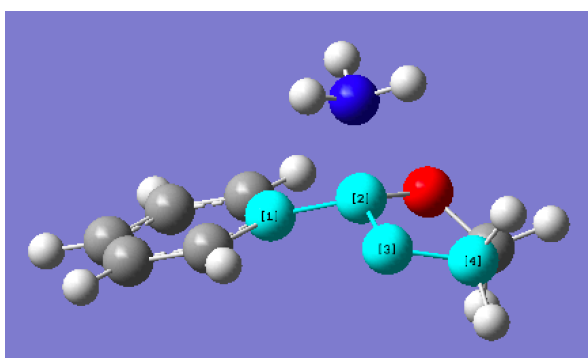

Charge = 0; Multiplicity = 1

M06-2X/def2-SVP

Dihedral angle = 146.7°

B–O bond: 1.43238 Å, 1.43828 Å

H = -541.383851 (hartree)

|   |             |             |             |
|---|-------------|-------------|-------------|
| C | 2.78017300  | -1.17559900 | 0.35266200  |
| C | 3.47295100  | 0.03476600  | 0.30064100  |
| C | 2.77311700  | 1.22378300  | 0.09431100  |
| C | 1.38700400  | 1.19677100  | -0.06699900 |
| C | 0.67345600  | -0.00917000 | -0.02849300 |
| C | 1.39453700  | -1.19189600 | 0.19019600  |
| B | -0.91160200 | -0.03623900 | -0.26693800 |
| O | -1.65238900 | 1.17495600  | -0.03696300 |
| C | -2.68342800 | 0.87074100  | 0.87146800  |
| C | -2.89457500 | -0.63946400 | 0.70015000  |
| O | -1.62584600 | -1.12262400 | 0.33417500  |
| H | 3.32307600  | -2.10650500 | 0.52866400  |
| H | 4.55675700  | 0.05186800  | 0.42990700  |
| H | 3.31019400  | 2.17411200  | 0.06708000  |
| H | 0.83498400  | 2.13079100  | -0.20613700 |
| H | 0.85037000  | -2.13874000 | 0.25521700  |
| H | -2.37091600 | 1.10397800  | 1.90546900  |
| H | -3.58724500 | 1.45821900  | 0.64715800  |
| H | -3.64250400 | -0.83922700 | -0.09545600 |
| H | -3.24660200 | -1.13513300 | 1.61699700  |
| H | -0.66212300 | 0.53939400  | -2.44893900 |
| H | -0.55156100 | -1.10519900 | -2.25409600 |
| H | -2.04188400 | -0.35801600 | -2.22345300 |
| N | -1.05829500 | -0.26751500 | -1.96414700 |

### PhB(eg)-H<sub>2</sub>O

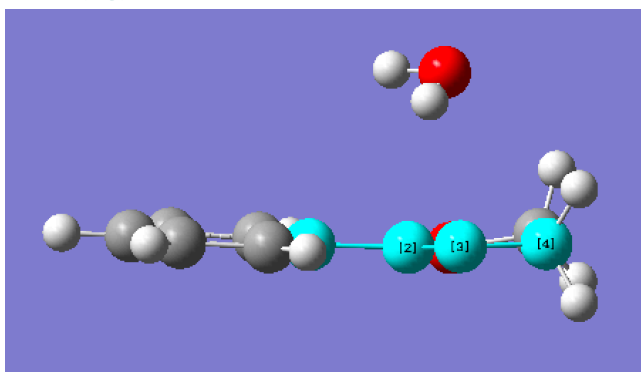

Charge = 0; Multiplicity = 1

M06-2X/def2-SVP

Dihedral angle = -176.2°

H = -561.247805 (hartree)

|   |            |             |             |
|---|------------|-------------|-------------|
| C | 2.84965200 | -1.19550500 | 0.19630000  |
| C | 3.54803700 | -0.01194100 | -0.04696500 |

|   |             |             |             |
|---|-------------|-------------|-------------|
| C | 2.86400000  | 1.20217600  | -0.12456000 |
| C | 1.48054700  | 1.23004200  | 0.04142800  |
| C | 0.76360600  | 0.04972000  | 0.28765800  |
| C | 1.46620600  | -1.16223100 | 0.36136000  |
| B | -0.78578700 | 0.08285000  | 0.43845900  |
| O | -1.52460600 | 1.22717700  | 0.41389100  |
| C | -2.89507000 | 0.85905400  | 0.32709800  |
| C | -2.91088800 | -0.66394100 | 0.59258600  |
| O | -1.54183000 | -1.05342800 | 0.56675200  |
| H | 3.38692400  | -2.14330000 | 0.25806400  |
| H | 4.63157800  | -0.03584200 | -0.17638900 |
| H | 3.41259600  | 2.12626600  | -0.31396600 |
| H | 0.93831300  | 2.17672900  | -0.01651100 |
| H | 0.91456700  | -2.08533500 | 0.55517300  |
| H | -3.47749300 | 1.42718400  | 1.06518300  |
| H | -3.25774600 | 1.09193100  | -0.68355100 |
| H | -3.46121900 | -1.21107100 | -0.18517700 |
| H | -3.33826900 | -0.91926600 | 1.57365300  |
| H | -1.22693900 | -1.15099500 | -1.73405500 |
| H | -0.73858000 | 0.13656500  | -2.36440600 |
| O | -1.53998000 | -0.38266900 | -2.22811000 |

### PhB(cat)

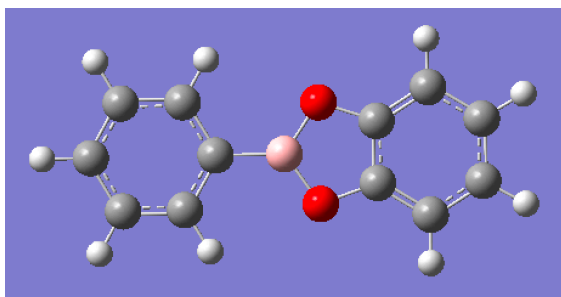

Charge = 0; Multiplicity = 1

M06-2X/def2-SVP

O–B–O angle = 110.7°

B–O bond: 1.38647 Å, 1.38647 Å

H = -637.185510 (hartree)

FIA = 322.8 (kJ/mol)

AA = 54.7 (kJ/mol)

HOMO: -0.28380 (hartree)

LUMO: -0.01009 (hartree)

GEI = 1.073 (eV)

|   |             |             |             |
|---|-------------|-------------|-------------|
| C | 3.88615400  | 1.20968300  | -0.00000200 |
| C | 4.58223300  | 0.00000000  | -0.00002000 |
| C | 3.88615500  | -1.20968300 | -0.00003500 |
| C | 2.49332200  | -1.20765700 | -0.00003100 |
| C | 1.77915900  | 0.00000000  | -0.00001300 |
| C | 2.49332200  | 1.20765700  | 0.00000200  |
| B | 0.23268500  | -0.00000100 | -0.00001100 |
| O | -0.55605800 | -1.14025400 | -0.00001700 |
| C | -1.84906700 | -0.69830900 | -0.00000400 |
| C | -1.84906600 | 0.69830900  | 0.00002000  |
| O | -0.55605700 | 1.14025400  | 0.00002200  |
| C | -3.02269400 | -1.43031200 | -0.00000900 |
| C | -4.21722300 | -0.69883300 | 0.00001400  |
| C | -4.21722300 | 0.69883400  | 0.00003800  |
| C | -3.02269400 | 1.43031200  | 0.00004100  |
| H | 4.43225800  | 2.15440000  | 0.00000900  |
| H | 5.67379900  | 0.00000100  | -0.00002300 |
| H | 4.43225900  | -2.15439900 | -0.00004900 |
| H | 1.94484400  | -2.15240200 | -0.00004300 |
| H | 1.94484200  | 2.15240100  | 0.00001600  |
| H | -3.00663100 | -2.51962000 | -0.00002700 |
| H | -5.16775500 | -1.23347100 | 0.00001300  |
| H | -5.16775500 | 1.23347200  | 0.00005600  |
| H | -3.00663000 | 2.51962000  | 0.00006000  |

### PhB(cat)-F<sup>-</sup>

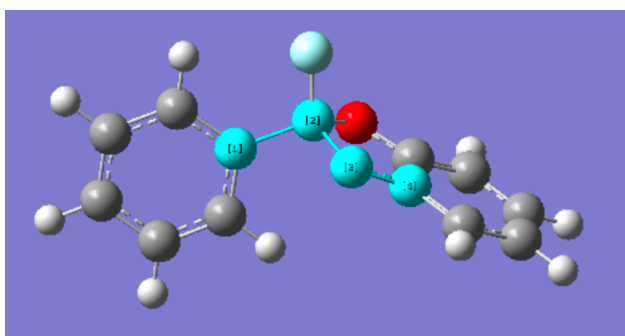

Charge = -1; Multiplicity = 1

M06-2X/def2-SVP

Dihedral angle = 125.1°

B-O bond: 1.50504 Å, 1.50504 Å

H = -737.028447 (hartree)



|   |             |             |             |
|---|-------------|-------------|-------------|
| C | 2.96561200  | -1.87960600 | 0.00010300  |
| C | 4.16804200  | -1.16846900 | 0.00012000  |
| C | 4.13732900  | 0.22570000  | 0.00005800  |
| C | 2.91198500  | 0.89751600  | -0.00002000 |
| C | 1.69385900  | 0.20727500  | -0.00003600 |
| C | 1.75119000  | -1.19432000 | 0.00002600  |
| B | 0.26179300  | 0.97202200  | -0.00010800 |
| O | -0.57966000 | 0.55460400  | 1.17584300  |
| C | -1.74791000 | 0.12087500  | 0.70972000  |
| C | -1.74791900 | 0.12073000  | -0.70973600 |
| O | -0.57967300 | 0.55436200  | -1.17596200 |
| C | -2.85985500 | -0.30552600 | 1.41771300  |
| C | -3.99017700 | -0.74023600 | 0.69465600  |
| C | -3.99018600 | -0.74037800 | -0.69446900 |
| C | -2.85987300 | -0.30581500 | -1.41762900 |
| F | 0.43721200  | 2.36135700  | -0.00024800 |
| H | 2.97985400  | -2.97271600 | 0.00015000  |
| H | 5.12302700  | -1.69983000 | 0.00018100  |
| H | 5.07349200  | 0.79061700  | 0.00006900  |
| H | 2.88564700  | 1.99028100  | -0.00007200 |
| H | 0.81325900  | -1.75814800 | 0.00001000  |
| H | -2.84375000 | -0.29923700 | 2.50860900  |
| H | -4.87476100 | -1.08074700 | 1.23764600  |
| H | -4.87477600 | -1.08099900 | -1.23737900 |
| H | -2.84378100 | -0.29974900 | -2.50852600 |

### PhB(cat)-NH<sub>3</sub>

The optimized structure of PhB(cat)-NH<sub>3</sub> obtained from the optimized structures of PhB(cat)-F was confirmed not to be local minima by verifying the presence of imaginary frequencies at the M06-2X/def2-SVP level of theory. Thus, we optimized the PhB(cat)-NH<sub>3</sub> structure starting from the following structure (Dihedral angle = 128.1°) at the M06-2X/def2-SVP level of theory and confirmed that the resulting structure have no imaginary frequency.

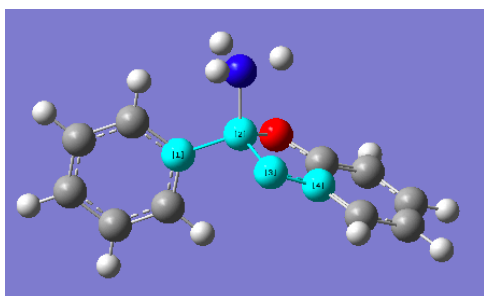

Dihedral angle = 128.1°

|   |             |             |             |
|---|-------------|-------------|-------------|
| C | 3.06137361  | -1.84720942 | -0.00016920 |
| C | 4.23483755  | -1.09727926 | 0.00022841  |
| C | 4.15176143  | 0.29077395  | 0.00045416  |
| C | 2.90651874  | 0.91629143  | 0.00028354  |
| C | 1.71197465  | 0.18824999  | -0.00010730 |
| C | 1.82597303  | -1.20800594 | -0.00033182 |
| B | 0.26064131  | 0.91558095  | -0.00025169 |
| O | -0.58802736 | 0.49603514  | 1.18159864  |
| C | -1.77435507 | 0.09596384  | 0.70592698  |
| C | -1.77439507 | 0.09562350  | -0.70591327 |
| O | -0.58808858 | 0.49545774  | -1.18184375 |
| C | -2.89536444 | -0.29688927 | 1.41388712  |
| C | -4.03455611 | -0.69781540 | 0.69402434  |
| C | -4.03459516 | -0.69814851 | -0.69350543 |
| C | -2.89544263 | -0.29756836 | -1.41362341 |
| H | 3.11225837  | -2.93127377 | -0.00035524 |
| H | 5.20109267  | -1.59025646 | 0.00035547  |
| H | 5.05891855  | 0.88682867  | 0.00075852  |
| H | 2.85062984  | 1.99870844  | 0.00044784  |
| H | 0.92224429  | -1.80816061 | -0.00065276 |
| H | -2.88608754 | -0.29265394 | 2.49738393  |
| H | -4.92195262 | -1.00961581 | 1.23341466  |
| H | -4.92202128 | -1.01020879 | -1.23269658 |

|   |             |             |             |
|---|-------------|-------------|-------------|
| H | -2.88622522 | -0.29385355 | -2.49712269 |
| H | 0.97196941  | 2.85872029  | 0.87302993  |
| H | 0.97227030  | 2.85827750  | -0.87427299 |
| H | -0.53279201 | 3.01673867  | -0.00092078 |
| N | 0.43318523  | 2.55653447  | -0.00063781 |

### PhB(cat)-NH<sub>3</sub>

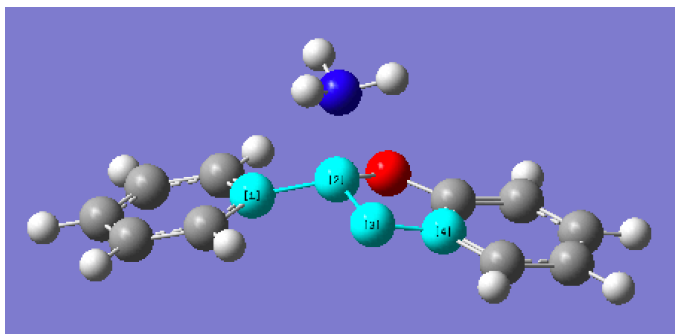

Charge = 0; Multiplicity = 1

M06-2X/def2-SVP

Dihedral angle = 147.0°

B–O bond: 1.45372 Å, 1.45375 Å

H = -693.641305 (hartree)

|   |             |             |             |
|---|-------------|-------------|-------------|
| C | 3.79717100  | -1.20650200 | 0.48795500  |
| C | 4.47697200  | 0.00059700  | 0.65283900  |
| C | 3.79653100  | 1.20736900  | 0.48825900  |
| C | 2.44252700  | 1.20264700  | 0.15232900  |
| C | 1.74467400  | -0.00003500 | -0.02638600 |
| C | 2.44318000  | -1.20239500 | 0.15201700  |
| B | 0.21548300  | -0.00043000 | -0.46318400 |
| O | -0.58295100 | 1.17093500  | -0.14101200 |
| C | -1.83345500 | 0.70349600  | 0.09522200  |
| C | -1.83347900 | -0.70345500 | 0.09623100  |
| O | -0.58296200 | -1.17125700 | -0.13923000 |
| C | -2.99381800 | 1.42275200  | 0.31899600  |
| C | -4.17484700 | 0.69669200  | 0.54645000  |
| C | -4.17486000 | -0.69594800 | 0.54748000  |
| C | -2.99385100 | -1.42236300 | 0.32105800  |
| H | 4.32347000  | -2.15229700 | 0.62996300  |
| H | 5.53553700  | 0.00083600  | 0.91879500  |
| H | 4.32231400  | 2.15341600  | 0.63049200  |
| H | 1.90612400  | 2.14981500  | 0.04614800  |
| H | 1.90724800  | -2.14981900 | 0.04564400  |

|   |             |             |             |
|---|-------------|-------------|-------------|
| H | -2.97629600 | 2.51260000  | 0.32216800  |
| H | -5.10568100 | 1.23584200  | 0.72692800  |
| H | -5.10570200 | -1.23481300 | 0.72876500  |
| H | -2.97634100 | -2.51220600 | 0.32583100  |
| H | 0.70394600  | 0.82894700  | -2.52789300 |
| H | 0.70431300  | -0.83204200 | -2.52737800 |
| H | -0.73896100 | -0.00184100 | -2.52187300 |
| N | 0.22420800  | -0.00154800 | -2.17634600 |

### PhB(cat)-H<sub>2</sub>O

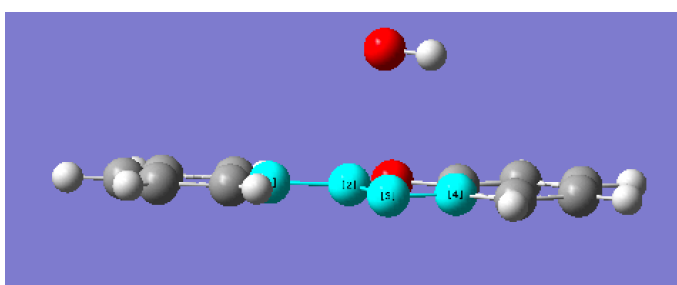

Charge = 0; Multiplicity = 1

M06-2X/def2-SVP

Dihedral angle = 179.3°

H = -713.495645 (hartree)

|   |             |             |             |
|---|-------------|-------------|-------------|
| C | -3.93299700 | -1.22349600 | -0.07161600 |
| C | -4.62617800 | -0.01621700 | -0.17098300 |
| C | -3.92708400 | 1.18619600  | -0.28358900 |
| C | -2.53409200 | 1.17863400  | -0.29621500 |
| C | -1.82344700 | -0.02631100 | -0.19670600 |
| C | -2.54029000 | -1.22644200 | -0.08490200 |
| B | -0.27801400 | -0.03255800 | -0.20959500 |
| O | 0.51095400  | 1.11370000  | -0.30252000 |
| C | 1.80009900  | 0.66985100  | -0.29643000 |
| C | 1.79940200  | -0.72924200 | -0.25707800 |
| O | 0.51318800  | -1.17330000 | -0.23972400 |
| C | 2.97511000  | 1.40002500  | -0.31380000 |
| C | 4.17145400  | 0.67011000  | -0.28707300 |
| C | 4.17135200  | -0.72621700 | -0.24582400 |
| C | 2.97580700  | -1.45752200 | -0.22990900 |
| H | -4.48186400 | -2.16229100 | 0.01740400  |
| H | -5.71759800 | -0.01254400 | -0.16055100 |
| H | -4.47093900 | 2.12887200  | -0.36215400 |
| H | -1.98387100 | 2.11801700  | -0.38701800 |

|   |             |             |             |
|---|-------------|-------------|-------------|
| H | -1.99367900 | -2.16851400 | -0.00526400 |
| H | 2.95910200  | 2.48895700  | -0.34928900 |
| H | 5.12148900  | 1.20518000  | -0.29976500 |
| H | 5.12163600  | -1.26066000 | -0.22566300 |
| H | 2.95968100  | -2.54640300 | -0.19850500 |
| H | 1.27117200  | -0.12041100 | 2.34737200  |
| H | 0.44677300  | 1.14555300  | 2.21050000  |
| O | 0.36377600  | 0.20345200  | 2.40045100  |

### PhB(nad)

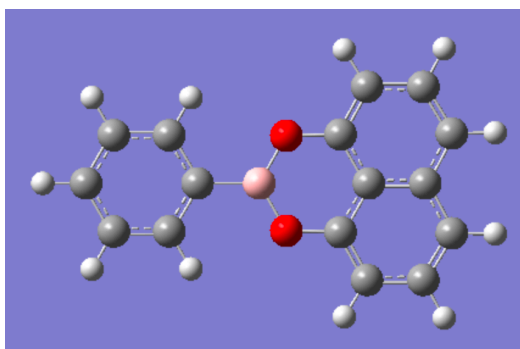

Charge = 0; Multiplicity = 1

M06-2X/def2-SVP

O–B–O angle = 120.6°

B–O bond: 1.37387 Å, 1.37387 Å

H = -790.616097 (hartree)

FIA = 334.7 (kJ/mol)

AA = 64.8 (kJ/mol)

HOMO: -0.25591 (hartree)

LUMO: -0.01030 (hartree)

GEI = 0.981 (eV)

|   |             |             |             |
|---|-------------|-------------|-------------|
| C | -4.59106100 | -1.20941600 | -0.00001100 |
| C | -5.28753000 | 0.00000000  | 0.00000300  |
| C | -4.59106100 | 1.20941600  | 0.00001500  |
| C | -3.19807500 | 1.20665600  | 0.00001200  |
| C | -2.48250500 | 0.00000000  | -0.00000200 |
| C | -3.19807500 | -1.20665600 | -0.00001400 |
| B | -0.92720800 | 0.00000000  | -0.00000600 |
| O | -0.24666900 | 1.19347400  | 0.00002100  |
| C | 1.11759900  | 1.22833900  | -0.00000600 |
| C | 1.82870100  | 0.00000000  | -0.00000100 |

|   |             |             |             |
|---|-------------|-------------|-------------|
| C | 1.11759900  | -1.22833900 | 0.00000400  |
| O | -0.24666900 | -1.19347400 | -0.00002600 |
| C | 1.78461800  | 2.42837100  | -0.00003000 |
| C | 3.20068900  | 2.42735000  | -0.00003800 |
| C | 3.91873100  | 1.25432400  | -0.00001900 |
| C | 3.24872100  | 0.00000000  | 0.00000100  |
| C | 3.91873100  | -1.25432400 | 0.00002300  |
| C | 3.20068900  | -2.42735000 | 0.00004000  |
| C | 1.78461800  | -2.42837100 | 0.00003000  |
| H | -5.13704800 | -2.15428800 | -0.00002100 |
| H | -6.37916600 | 0.00000000  | 0.00000500  |
| H | -5.13704800 | 2.15428800  | 0.00002600  |
| H | -2.64860000 | 2.15066400  | 0.00002100  |
| H | -2.64860000 | -2.15066400 | -0.00002500 |
| H | 1.21290200  | 3.35582700  | -0.00003400 |
| H | 3.72683100  | 3.38322000  | -0.00005600 |
| H | 5.00970900  | 1.27050000  | -0.00001900 |
| H | 5.00970900  | -1.27050000 | 0.00002500  |
| H | 3.72683100  | -3.38322000 | 0.00006100  |
| H | 1.21290200  | -3.35582700 | 0.00003400  |

### PhB(nad)-F<sup>-</sup>

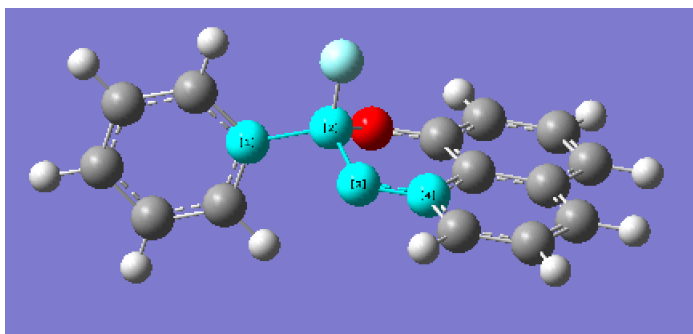

Charge = -1; Multiplicity = 1

M06-2X/def2-SVP

Dihedral angle = 160.1°

B-O bond: 1.48777 Å, 1.48776 Å

H = -890.463572 (hartree)

|   |            |             |             |
|---|------------|-------------|-------------|
| C | 3.22300100 | -2.42352800 | -0.21175000 |
| C | 3.94476600 | -1.24968000 | -0.23308300 |
| C | 3.26896500 | -0.00003800 | -0.16161000 |
| C | 1.85150200 | -0.00002000 | -0.03838300 |
| C | 1.12047600 | -1.23062100 | -0.01350100 |

|   |             |             |             |
|---|-------------|-------------|-------------|
| C | 1.81755500  | -2.42936700 | -0.10757700 |
| C | 3.94483900  | 1.24959200  | -0.23261900 |
| C | 3.22314400  | 2.42347500  | -0.21084900 |
| C | 1.81769800  | 2.42935500  | -0.10667100 |
| C | 1.12055100  | 1.23061500  | -0.01304900 |
| O | -0.20006200 | -1.21631800 | 0.06694000  |
| O | -0.19999500 | 1.21636200  | 0.06736300  |
| B | -0.87545300 | -0.00004100 | 0.59418300  |
| F | -0.76356200 | -0.00030800 | 1.99621500  |
| C | -2.42385500 | 0.00006600  | 0.12130100  |
| C | -2.77563700 | 0.00101600  | -1.23610100 |
| C | -4.10831800 | 0.00104500  | -1.64763000 |
| C | -5.13234700 | 0.00011700  | -0.69783100 |
| C | -4.80685800 | -0.00082600 | 0.65818400  |
| C | -3.46732900 | -0.00083600 | 1.05472600  |
| H | 3.74957800  | -3.37952800 | -0.27558200 |
| H | 5.03341700  | -1.26029800 | -0.31812000 |
| H | 1.24787300  | -3.35858000 | -0.09040000 |
| H | 5.03349000  | 1.26017600  | -0.31765700 |
| H | 3.74977600  | 3.37946800  | -0.27432500 |
| H | 1.24807000  | 3.35859400  | -0.08915100 |
| H | -1.97868100 | 0.00177800  | -1.98510600 |
| H | -4.35420800 | 0.00180700  | -2.71278200 |
| H | -6.17815500 | 0.00013100  | -1.01482900 |
| H | -5.60171300 | -0.00156200 | 1.40879800  |
| H | -3.20859100 | -0.00155500 | 2.11654000  |

### PhB(nad)-NH<sub>3</sub>

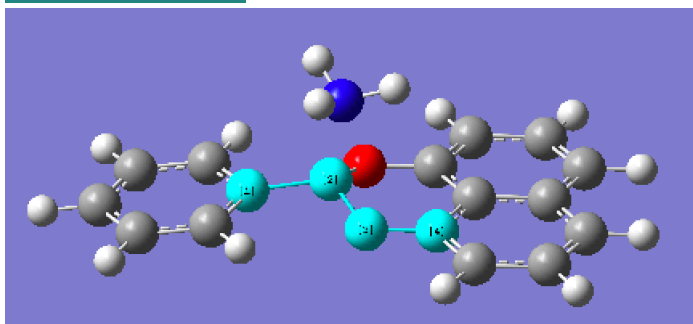

Charge = 0; Multiplicity = 1

### M06-2X/def2-SVP

Dihedral angle = 169.8°

B-O bond: 1.44109 Å, 1.44110 Å

H = -847.075741 (hartree)

|   |             |             |             |
|---|-------------|-------------|-------------|
| C | -3.25465800 | 2.42511300  | -0.17309600 |
| C | -3.96822800 | 1.24931400  | -0.14709600 |
| C | -3.28998600 | -0.00007400 | -0.13212500 |
| C | -1.86690900 | -0.00002700 | -0.12360400 |
| C | -1.15154500 | 1.23634200  | -0.14768900 |
| C | -1.84119800 | 2.43101200  | -0.17333700 |
| C | -3.96814000 | -1.24951200 | -0.14681200 |
| C | -3.25449000 | -2.42526900 | -0.17254600 |
| C | -1.84102800 | -2.43107800 | -0.17273900 |
| C | -1.15146600 | -1.23635700 | -0.14731600 |
| O | 0.19479700  | 1.21999600  | -0.14247200 |
| O | 0.19489600  | -1.21993000 | -0.14197500 |
| B | 0.85733400  | 0.00014300  | 0.24450900  |
| C | 2.42796200  | 0.00009800  | -0.02711400 |
| C | 3.14229300  | -1.20214600 | -0.12563600 |
| C | 4.52552700  | -1.20682700 | -0.30689200 |
| C | 5.22028700  | -0.00020400 | -0.39389200 |
| C | 4.52586900  | 1.20657000  | -0.30600000 |
| C | 3.14262100  | 1.20212400  | -0.12474000 |
| H | -3.78483400 | 3.37887500  | -0.19509200 |
| H | -5.05920500 | 1.25797000  | -0.15102700 |
| H | -1.27486600 | 3.36179500  | -0.20102000 |
| H | -5.05911600 | -1.25824600 | -0.15074200 |
| H | -3.78460900 | -3.37906800 | -0.19434200 |
| H | -1.27463400 | -3.36182900 | -0.20015400 |
| H | 2.59646300  | -2.14837400 | -0.07924800 |
| H | 5.06402100  | -2.15291700 | -0.38871900 |
| H | 6.30214600  | -0.00030600 | -0.53863400 |
| H | 5.06459400  | 2.15258100  | -0.38713200 |
| H | 2.59712100  | 2.14853700  | -0.07765500 |
| H | 1.14317900  | -0.82956600 | 2.33614200  |
| H | 1.14357300  | 0.83050100  | 2.33585200  |
| H | -0.29558400 | 0.00077900  | 2.22608400  |
| N | 0.69086700  | 0.00050700  | 1.94893000  |



## PhB(nad)-H<sub>2</sub>O

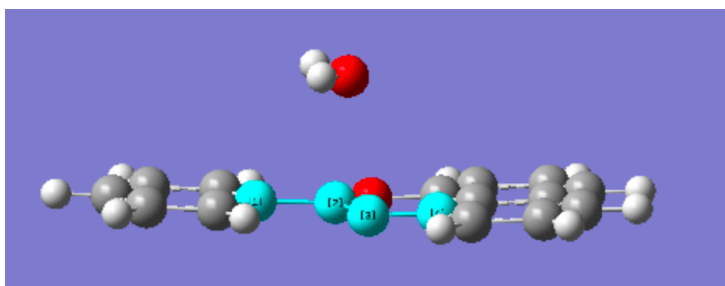

Charge = 0; Multiplicity = 1

M06-2X/def2-SVP

Dihedral angle = -177.0°

H = -866.928006 (hartree)

|   |             |             |             |
|---|-------------|-------------|-------------|
| C | -3.25794200 | 2.42574800  | -0.09719400 |
| C | -3.97365000 | 1.25259200  | -0.05207500 |
| C | -3.30287500 | -0.00122600 | -0.08515900 |
| C | -1.88525100 | -0.00210800 | -0.15889600 |
| C | -1.17491900 | 1.22721700  | -0.20254600 |
| C | -1.84434100 | 2.42628500  | -0.17442700 |
| C | -3.97525200 | -1.25409700 | -0.05471700 |
| C | -3.26071700 | -2.42797600 | -0.10224800 |
| C | -1.84726400 | -2.43020200 | -0.17959200 |
| C | -1.17612100 | -1.23204400 | -0.20528700 |
| O | 0.18449500  | 1.19639600  | -0.27752600 |
| O | 0.18271200  | -1.20256900 | -0.28190500 |
| B | 0.85366700  | -0.00447600 | -0.21461400 |
| C | 2.41575300  | -0.00395900 | -0.23232300 |
| C | 3.13281900  | -1.20923700 | -0.20341300 |
| C | 4.52661000  | -1.21159000 | -0.18723300 |
| C | 5.22356200  | -0.00264200 | -0.20162500 |
| C | 4.52593500  | 1.20558100  | -0.23430000 |
| C | 3.13219400  | 1.20188200  | -0.24951800 |
| H | -3.78362700 | 3.38154500  | -0.07379400 |
| H | -5.06296800 | 1.26708800  | 0.00637100  |
| H | -1.27461000 | 3.35424700  | -0.21228700 |
| H | -5.06457700 | -1.26743600 | 0.00372700  |
| H | -3.78752400 | -3.38320000 | -0.08055100 |
| H | -1.27857100 | -3.35869500 | -0.21860200 |
| H | 2.58298300  | -2.15343700 | -0.20020200 |
| H | 5.07297400  | -2.15601800 | -0.16711600 |
| H | 6.31495100  | -0.00213300 | -0.19059900 |
| H | 5.07185800  | 2.15032600  | -0.25137900 |

|   |            |             |             |
|---|------------|-------------|-------------|
| H | 2.58200300 | 2.14529600  | -0.28236600 |
| H | 1.33886600 | -0.66909500 | 2.38919400  |
| H | 1.16957200 | 0.83958200  | 2.35154000  |
| O | 0.67017900 | 0.01729200  | 2.27473900  |

### PhB(*i*Pdan)

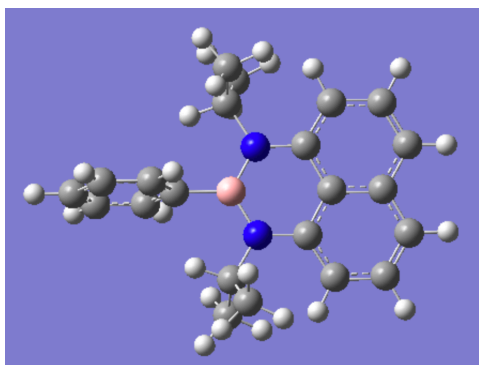

Charge = 0; Multiplicity = 1

M06-2X/def2-SVP

N–B–N angle = 120.4°

B–N bond: 1.43354 Å, 1.43354 Å

H = -986.263149 (hartree)

AA = 21.6 (kJ/mol)

|   |             |             |             |
|---|-------------|-------------|-------------|
| C | -4.41122000 | -0.14409200 | -1.19674400 |
| C | -5.11222900 | 0.00004900  | 0.00022900  |
| C | -4.41107600 | 0.14417900  | 1.19710000  |
| C | -3.01601400 | 0.14533300  | 1.19363400  |
| C | -2.29207600 | 0.00003500  | 0.00005500  |
| C | -3.01617500 | -0.14526100 | -1.19345000 |
| B | -0.70457900 | 0.00000200  | -0.00003200 |
| N | 0.00781300  | 1.24365800  | -0.02915100 |
| N | 0.00778900  | -1.24367000 | 0.02897900  |
| C | 1.40907600  | 1.25613500  | 0.04982700  |
| C | 1.40907000  | -1.25617000 | -0.04977300 |
| C | 2.14893700  | 2.42671000  | 0.16056500  |
| C | 3.55713700  | 2.40655500  | 0.18488100  |
| C | 4.24553900  | 1.22661500  | 0.09448100  |
| C | 3.53717100  | -0.00001500 | 0.00009400  |
| C | 2.10767100  | -0.00001900 | 0.00003000  |
| C | 4.24555000  | -1.22664500 | -0.09418800 |
| C | 3.55715400  | -2.40659700 | -0.18447000 |
| C | 2.14895200  | -2.42676000 | -0.16023700 |

|   |             |             |             |
|---|-------------|-------------|-------------|
| H | -4.95365500 | -0.25611500 | -2.13717000 |
| H | -6.20337700 | 0.00005200  | 0.00029100  |
| H | -4.95338000 | 0.25620200  | 2.13760100  |
| H | -2.48048600 | 0.25695200  | 2.14064900  |
| H | -2.48075200 | -0.25690100 | -2.14052200 |
| H | 1.65317400  | 3.38724500  | 0.22408700  |
| H | 4.09399000  | 3.35295000  | 0.26900800  |
| H | 5.33608700  | 1.20468800  | 0.09686000  |
| H | 5.33609700  | -1.20471700 | -0.09652400 |
| H | 4.09401200  | -3.35300400 | -0.26842900 |
| H | 1.65322600  | -3.38732000 | -0.22359600 |
| C | -0.75516900 | -2.50364900 | 0.15009800  |
| C | -0.41499400 | -3.31128800 | 1.40677900  |
| C | -0.79962300 | -3.31678300 | -1.14671400 |
| H | -1.78793200 | -2.17803200 | 0.30949200  |
| H | -0.45348800 | -2.65537800 | 2.28830100  |
| H | -1.17218400 | -4.09785500 | 1.53634900  |
| H | 0.56919400  | -3.79242700 | 1.39034500  |
| H | -1.19884600 | -2.69185300 | -1.95845300 |
| H | 0.17436000  | -3.70167800 | -1.47126100 |
| H | -1.47701000 | -4.17299400 | -1.01547800 |
| C | -0.75508400 | 2.50364200  | -0.15067500 |
| C | -0.41421700 | 3.31130300  | -1.40714900 |
| C | -0.80013900 | 3.31674300  | 1.14612900  |
| H | -1.78776300 | 2.17802400  | -0.31063600 |
| H | -0.45198200 | 2.65537300  | -2.28868600 |
| H | -1.17148500 | 4.09771000  | -1.53722600 |
| H | 0.56985400  | 3.79265700  | -1.39005900 |
| H | -1.20025700 | 2.69196400  | 1.95754300  |
| H | 0.17382300  | 3.70110200  | 1.47139200  |
| H | -1.47699300 | 4.17330900  | 1.01446300  |

### PhB(*i*Pdan)-NH<sub>3</sub>

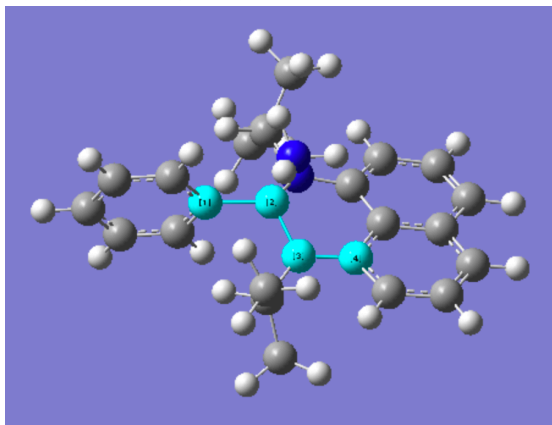

Charge = 0; Multiplicity = 1

M06-2X/def2-SVP

Dihedral angle = 176.3°

B-N bond: 1.50945 Å, 1.50171 Å

H = -1042.706337 (hartree)

|   |             |             |             |
|---|-------------|-------------|-------------|
| C | 4.09432700  | -0.20494200 | -1.48006500 |
| C | 5.03679400  | -0.02846600 | -0.46351700 |
| C | 4.60274500  | 0.16598400  | 0.84391700  |
| C | 3.23392000  | 0.17907200  | 1.13108000  |
| C | 2.26831200  | 0.00043200  | 0.13341800  |
| C | 2.73522500  | -0.18933300 | -1.18035200 |
| B | 0.67308000  | 0.01192900  | 0.36770300  |
| N | -0.02938400 | -1.26737200 | -0.01748400 |
| N | -0.02196400 | 1.24977300  | -0.12199200 |
| C | -1.40555700 | -1.24972100 | -0.18003500 |
| C | -1.40518400 | 1.26939000  | -0.01272700 |
| C | -2.16518000 | -2.39948300 | -0.40772300 |
| C | -3.57074300 | -2.36511500 | -0.44633300 |
| C | -4.25815200 | -1.19412300 | -0.25874100 |
| C | -3.54116500 | 0.01776100  | -0.08187900 |
| C | -2.11114200 | 0.01002200  | -0.07146200 |
| C | -4.24638000 | 1.24350200  | 0.05996700  |
| C | -3.55494900 | 2.41958600  | 0.18494800  |
| C | -2.14741400 | 2.43904100  | 0.14919400  |
| H | 4.42479900  | -0.35347600 | -2.50977200 |
| H | 6.10338700  | -0.04084500 | -0.69339300 |
| H | 5.32905000  | 0.30804400  | 1.64625700  |
| H | 2.93628000  | 0.33616700  | 2.17278300  |
| H | 2.00340200  | -0.31658800 | -1.98359100 |
| H | -1.67761800 | -3.35709400 | -0.54626800 |

|   |             |             |             |
|---|-------------|-------------|-------------|
| H | -4.11165800 | -3.29836300 | -0.61528500 |
| H | -5.34848700 | -1.16642700 | -0.26593000 |
| H | -5.33707600 | 1.22418200  | 0.05927600  |
| H | -4.09135500 | 3.36301000  | 0.30421400  |
| H | -1.64319800 | 3.39521700  | 0.23951800  |
| H | 0.83426200  | -0.69421000 | 2.61979800  |
| H | 0.73395700  | 0.96573400  | 2.51428500  |
| H | -0.60188700 | 0.03492000  | 2.22241600  |
| N | 0.41535500  | 0.08411100  | 2.10804700  |
| C | 0.70659900  | -2.53202800 | 0.11493300  |
| C | 0.87243400  | -3.29513200 | -1.20419000 |
| C | 0.24783700  | -3.42927200 | 1.27632100  |
| H | 1.72542800  | -2.22804700 | 0.38795500  |
| H | 1.36440700  | -2.64865400 | -1.94320500 |
| H | 1.50936800  | -4.17800400 | -1.04623400 |
| H | -0.07654100 | -3.63329500 | -1.63763300 |
| H | 0.16438800  | -2.84890600 | 2.20886500  |
| H | -0.72040100 | -3.91615400 | 1.11525500  |
| H | 0.99751400  | -4.21656600 | 1.44184200  |
| C | 0.74332000  | 2.47056600  | -0.39397600 |
| C | 0.97822100  | 3.34220200  | 0.84878300  |
| C | 0.25386200  | 3.25861900  | -1.61395700 |
| H | 1.73794300  | 2.11372400  | -0.68559400 |
| H | 1.60499400  | 2.79934500  | 1.57556300  |
| H | 1.52601600  | 4.25756500  | 0.58039200  |
| H | 0.04603400  | 3.63788600  | 1.34959800  |
| H | 0.06008700  | 2.56529300  | -2.44443300 |
| H | -0.65762600 | 3.84291700  | -1.44472200 |
| H | 1.04471600  | 3.95602300  | -1.92609800 |

### PhB(Cydan)

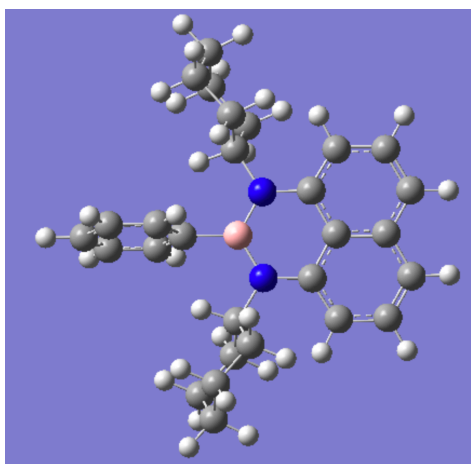

Charge = 0; Multiplicity = 1

[M06-2X/def2-SVP](#)

N–B–N angle = 120.4°

B–N bond: 1.43348 Å, 1.43348 Å

H = -1219.331159 (hartree)

AA = 22.1 (kJ/mol)

|   |             |             |             |
|---|-------------|-------------|-------------|
| C | -0.14695200 | 4.07400000  | -1.19663000 |
| C | -0.00000300 | 4.77517500  | -0.00001100 |
| C | 0.14693700  | 4.07403900  | 1.19662600  |
| C | 0.14807800  | 2.67884300  | 1.19323400  |
| C | 0.00000700  | 1.95486200  | 0.00002900  |
| C | -0.14809200 | 2.67880800  | -1.19319800 |
| B | 0.00001300  | 0.36727900  | 0.00003700  |
| N | 1.24381700  | -0.34483400 | 0.02670100  |
| N | -1.24379700 | -0.34481500 | -0.02663500 |
| C | 1.25120900  | -1.74553900 | 0.12211700  |
| C | -1.25121400 | -1.74551800 | -0.12205500 |
| C | 2.41153800  | -2.48424200 | 0.31374100  |
| C | 2.38954600  | -3.89234000 | 0.34217300  |
| C | 1.21816000  | -4.58121300 | 0.17455200  |
| C | -0.00002000 | -3.87339700 | -0.00000900 |
| C | -0.00001000 | -2.44394800 | 0.00001700  |
| C | -1.21821100 | -4.58118800 | -0.17458600 |
| C | -2.38959100 | -3.89228900 | -0.34215800 |
| C | -2.41156200 | -2.48419300 | -0.31367400 |
| H | -0.26052800 | 4.61636500  | -2.13692800 |
| H | -0.00000300 | 5.86633000  | -0.00003000 |
| H | 0.26050400  | 4.61642900  | 2.13691000  |
| H | 0.26153800  | 2.14334800  | 2.14000300  |
| H | -0.26156600 | 2.14327600  | -2.13994300 |
| H | 3.36538300  | -1.98619700 | 0.43659000  |
| H | 3.32820100  | -4.42892400 | 0.49023400  |
| H | 1.19654000  | -5.67177900 | 0.17628000  |
| H | -1.19660800 | -5.67175400 | -0.17636400 |
| H | -3.32825800 | -4.42885300 | -0.49021300 |
| H | -3.36540800 | -1.98613500 | -0.43647900 |
| C | -2.49989100 | 0.42024500  | 0.06378700  |
| C | -3.28510600 | 0.52224900  | -1.25217200 |
| C | -3.37749900 | 0.06805700  | 1.27411100  |
| H | -2.18001700 | 1.45039400  | 0.26385100  |
| C | -4.44128700 | 1.51198000  | -1.09343200 |

|   |             |             |             |
|---|-------------|-------------|-------------|
| H | -3.67970500 | -0.45090900 | -1.57815400 |
| H | -2.59551900 | 0.85957600  | -2.04163300 |
| C | -4.52881300 | 1.07020700  | 1.38708700  |
| H | -3.78975400 | -0.94818700 | 1.21082300  |
| H | -2.74927500 | 0.09501500  | 2.17809400  |
| C | -5.33483800 | 1.13767200  | 0.08943900  |
| H | -5.02809900 | 1.55888300  | -2.02278400 |
| H | -4.02953600 | 2.52299600  | -0.92740800 |
| H | -5.17914500 | 0.80067900  | 2.23242600  |
| H | -4.12131300 | 2.07214200  | 1.60808200  |
| H | -6.16022100 | 1.85854300  | 0.18847800  |
| H | -5.79619700 | 0.15265800  | -0.10203900 |
| C | 2.49992300  | 0.42021300  | -0.06377200 |
| C | 3.28516500  | 0.52228500  | 1.25216400  |
| C | 3.37750500  | 0.06797900  | -1.27409900 |
| H | 2.18004100  | 1.45034800  | -0.26388400 |
| C | 4.44132900  | 1.51202400  | 1.09335400  |
| H | 3.67978100  | -0.45085300 | 1.57818200  |
| H | 2.59559200  | 0.85963900  | 2.04162700  |
| C | 4.52879600  | 1.07014500  | -1.38714500 |
| H | 3.78977800  | -0.94825600 | -1.21078200 |
| H | 2.74926400  | 0.09489400  | -2.17807100 |
| C | 5.33485800  | 1.13768100  | -0.08952300 |
| H | 5.02815900  | 1.55897600  | 2.02269200  |
| H | 4.02956000  | 2.52302800  | 0.92729600  |
| H | 5.17910700  | 0.80059300  | -2.23249300 |
| H | 4.12127100  | 2.07206300  | -1.60817000 |
| H | 6.16022300  | 1.85856400  | -0.18861900 |
| H | 5.79624200  | 0.15268600  | 0.10198600  |

### PhB(Cydan)-NH<sub>3</sub>

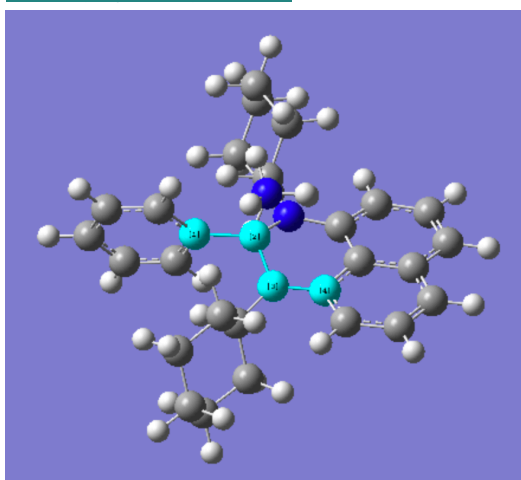

Charge = 0; Multiplicity = 1

[M06-2X/def2-SVP](#)

Dihedral angle = 177.6°

B-N bond: 1.51168 Å, 1.50449 Å

H = -1275.774539 (hartree)

|   |             |             |             |
|---|-------------|-------------|-------------|
| C | -0.00733200 | -3.83985100 | -1.23656400 |
| C | 0.18736700  | -4.72661700 | -0.17351900 |
| C | 0.31649400  | -4.22615600 | 1.11778300  |
| C | 0.24755800  | -2.84697300 | 1.34338500  |
| C | 0.05175400  | -1.93686300 | 0.29876700  |
| C | -0.07159200 | -2.47056700 | -0.99797300 |
| B | -0.00272600 | -0.33410900 | 0.46770500  |
| N | -1.27233300 | 0.31879800  | -0.02927500 |
| N | 1.24718900  | 0.37799700  | 0.02711800  |
| C | -1.28477500 | 1.69731400  | -0.17735100 |
| C | 1.22691500  | 1.76273100  | 0.10679700  |
| C | -2.44342700 | 2.42966600  | -0.44598900 |
| C | -2.44323900 | 3.83546500  | -0.48171900 |
| C | -1.29774800 | 4.55152000  | -0.25020700 |
| C | -0.07643300 | 3.86495900  | -0.02471000 |
| C | -0.04813000 | 2.43435400  | -0.01049300 |
| C | 1.12370200  | 4.60300100  | 0.15954200  |
| C | 2.31290600  | 3.94372700  | 0.32823100  |
| C | 2.36984700  | 2.53766500  | 0.30315700  |
| H | -0.10628300 | -4.22206600 | -2.25424500 |
| H | 0.23909900  | -5.80127200 | -0.35530300 |
| H | 0.47116900  | -4.90792900 | 1.95605800  |
| H | 0.35689300  | -2.49677200 | 2.37461800  |
| H | -0.21347600 | -1.78241400 | -1.83669300 |
| H | -3.38292700 | 1.91925900  | -0.61996600 |
| H | -3.38288900 | 4.35283400  | -0.68530100 |
| H | -1.29641800 | 5.64219600  | -0.25825700 |
| H | 1.07504900  | 5.69273900  | 0.15419000  |
| H | 3.23707600  | 4.50545200  | 0.47772500  |
| H | 3.33390600  | 2.05751000  | 0.43310600  |
| H | -0.84886600 | -0.43489000 | 2.66091300  |
| H | 0.81097200  | -0.27351200 | 2.66433500  |
| H | -0.14610200 | 1.01289400  | 2.25972300  |
| N | -0.05205700 | -0.00534700 | 2.18797600  |
| C | -2.50841400 | -0.46670600 | -0.04197900 |
| C | -3.52591800 | -0.13877200 | 1.06900100  |
| C | -3.17680000 | -0.59350500 | -1.42139800 |



|   |             |             |             |
|---|-------------|-------------|-------------|
| H | -2.18943800 | -1.49225000 | 0.19099600  |
| C | -4.65003100 | -1.17726300 | 1.08256400  |
| H | -3.95932700 | 0.86390000  | 0.95103700  |
| H | -3.00860900 | -0.13138900 | 2.04402000  |
| C | -4.30620600 | -1.62327800 | -1.37410700 |
| H | -3.57540300 | 0.36904600  | -1.77326000 |
| H | -2.40876900 | -0.89502000 | -2.14893000 |
| C | -5.32396200 | -1.28070200 | -0.28592600 |
| H | -5.38868900 | -0.92523200 | 1.85839700  |
| H | -4.23254000 | -2.16390800 | 1.34997500  |
| H | -4.79948100 | -1.69051800 | -2.35532000 |
| H | -3.87795100 | -2.61975100 | -1.16609100 |
| H | -6.12750700 | -2.03210400 | -0.25943300 |
| H | -5.80136900 | -0.31468300 | -0.52741600 |
| C | 2.48377000  | -0.36899200 | -0.19844600 |
| C | 3.29115700  | 0.08096100  | -1.42536100 |
| C | 3.36780800  | -0.57044900 | 1.04626500  |
| H | 2.15616700  | -1.38409900 | -0.46025900 |
| C | 4.42953500  | -0.90367100 | -1.69814900 |
| H | 3.71252800  | 1.08762900  | -1.29748300 |
| H | 2.60537500  | 0.13638800  | -2.28461000 |
| C | 4.51916600  | -1.53070700 | 0.74065300  |
| H | 3.76933900  | 0.38502200  | 1.41862100  |
| H | 2.74710900  | -0.99402400 | 1.85541600  |
| C | 5.32674700  | -1.06395000 | -0.47045800 |
| H | 5.01933800  | -0.56735400 | -2.56393900 |
| H | 4.00822900  | -1.88861100 | -1.96527100 |
| H | 5.16944700  | -1.63963800 | 1.62179800  |
| H | 4.10070600  | -2.53042500 | 0.52920200  |
| H | 6.14344700  | -1.77137300 | -0.67934900 |
| H | 5.79991700  | -0.09327200 | -0.23903600 |

## PhB(Phdan)

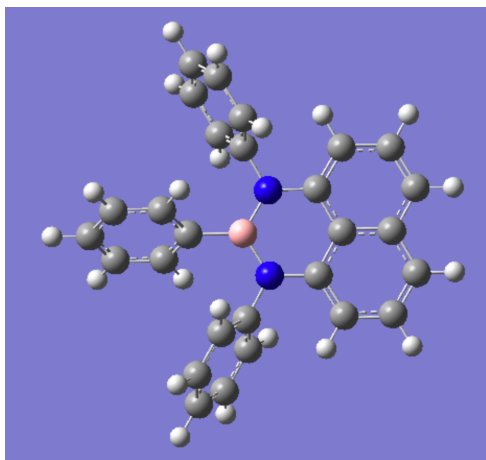

Charge = 0; Multiplicity = 1

M06-2X/def2-SVP

N–B–N angle = 117.8°

B–N bond: 1.43507 Å, 1.43507 Å

H = -1212.279056 (hartree)

AA = 29.1 (kJ/mol)

|   |             |             |             |
|---|-------------|-------------|-------------|
| C | -0.67818200 | -4.03220300 | 0.99690600  |
| C | -0.00059500 | -4.73302400 | -0.00007600 |
| C | 0.67711000  | -4.03230700 | -0.99704900 |
| C | 0.68152700  | -2.63839000 | -0.98942700 |
| C | -0.00036500 | -1.91350400 | -0.00006000 |
| C | -0.68236900 | -2.63828500 | 0.98930200  |
| B | -0.00014300 | -0.33442600 | -0.00006000 |
| N | 1.22777100  | 0.40698400  | 0.04425100  |
| N | -1.22778200 | 0.40744700  | -0.04434400 |
| C | 1.24691800  | 1.81325800  | 0.09885900  |
| C | -1.24639700 | 1.81373400  | -0.09894500 |
| C | 2.42397000  | 2.52824500  | 0.25161100  |
| C | 2.40534900  | 3.93849100  | 0.27233200  |
| C | 1.23123600  | 4.63461400  | 0.13885000  |
| C | 0.00066800  | 3.93809300  | -0.00001800 |
| C | 0.00039200  | 2.51181200  | -0.00003500 |
| C | -1.22963200 | 4.63509000  | -0.13886200 |
| C | -2.40401500 | 3.93942200  | -0.27234400 |
| C | -2.42318000 | 2.52918200  | -0.25165600 |
| H | -1.21082600 | -4.57334900 | 1.78072000  |
| H | -0.00067500 | -5.82438000 | -0.00007400 |
| H | 1.20967200  | -4.57353400 | -1.78086300 |

|   |             |             |             |
|---|-------------|-------------|-------------|
| H | 1.23340700  | -2.10538400 | -1.76749800 |
| H | -1.23414600 | -2.10519600 | 1.76739000  |
| H | 3.37124100  | 2.00246700  | 0.35219100  |
| H | 3.34867100  | 4.47416800  | 0.39085400  |
| H | 1.22000800  | 5.72543100  | 0.14104100  |
| H | -1.21798300 | 5.72590200  | -0.14101500 |
| H | -3.34713300 | 4.47546600  | -0.39083400 |
| H | -3.37065500 | 2.00376600  | -0.35222000 |
| C | -2.48251000 | -0.28104700 | -0.05986500 |
| C | -2.87914200 | -0.98953300 | -1.19305500 |
| C | -3.30026100 | -0.26520000 | 1.07334300  |
| C | -4.07978000 | -1.69846100 | -1.18683900 |
| H | -2.22871000 | -0.99438000 | -2.06888500 |
| C | -4.50350300 | -0.96589100 | 1.07328400  |
| H | -2.97831700 | 0.29924600  | 1.95084500  |
| C | -4.89355100 | -1.68835200 | -0.05563800 |
| H | -4.37846000 | -2.26230800 | -2.07157600 |
| H | -5.13618100 | -0.95525500 | 1.96206000  |
| H | -5.83247400 | -2.24355300 | -0.05179100 |
| C | 2.48227600  | -0.28191200 | 0.05985900  |
| C | 3.30006900  | -0.26635500 | -1.07332000 |
| C | 2.87871100  | -0.99036900 | 1.19313500  |
| C | 4.50318700  | -0.96726200 | -1.07314100 |
| H | 2.97828600  | 0.29809400  | -1.95088000 |
| C | 4.07922100  | -1.69951300 | 1.18704100  |
| H | 2.22825300  | -0.99497200 | 2.06894800  |
| C | 4.89305400  | -1.68966200 | 0.05587800  |
| H | 5.13591600  | -0.95681500 | -1.96188300 |
| H | 4.37776600  | -2.26331600 | 2.07185200  |
| H | 5.83188700  | -2.24501500 | 0.05214400  |

### PhB(Phdan)-NH<sub>3</sub>

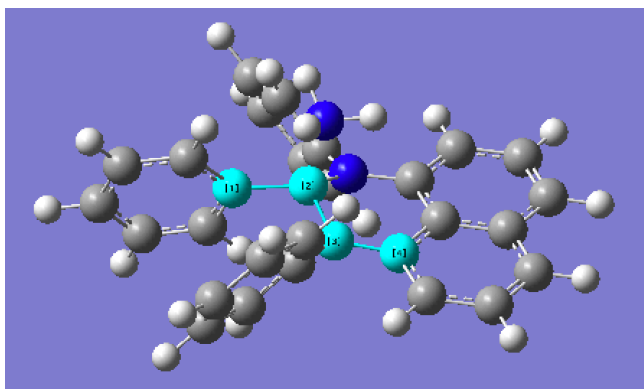

Charge = 0; Multiplicity = 1

[M06-2X/def2-SVP](#)

Dihedral angle = 166.0°

B-N bond: 1.50863 Å, 1.51867 Å

H = -1268.725116 (hartree)

|   |             |             |             |
|---|-------------|-------------|-------------|
| C | 1.84827300  | -3.30367700 | -1.30973500 |
| C | 2.85445700  | -3.68355800 | -0.41903600 |
| C | 3.00567500  | -2.98988800 | 0.77823000  |
| C | 2.15334200  | -1.92449600 | 1.07759500  |
| C | 1.13746900  | -1.52288800 | 0.20239200  |
| C | 1.00623400  | -2.23958700 | -0.99841000 |
| B | 0.20151100  | -0.23890000 | 0.44764800  |
| N | -1.27186800 | -0.42326000 | 0.18096900  |
| N | 0.73024800  | 1.03100400  | -0.19589800 |
| C | -2.09135600 | 0.70879700  | 0.18346800  |
| C | -0.09206900 | 2.14360700  | -0.32429200 |
| C | -3.45500200 | 0.63076800  | 0.44815000  |
| C | -4.26487000 | 1.78223400  | 0.42619800  |
| C | -3.73375000 | 3.01574700  | 0.14202300  |
| C | -2.34450200 | 3.14965700  | -0.12066600 |
| C | -1.50180800 | 1.99641500  | -0.06877200 |
| C | -1.78838100 | 4.41277900  | -0.45692200 |
| C | -0.45237800 | 4.51473700  | -0.75417700 |
| C | 0.39780800  | 3.39385700  | -0.69037600 |
| H | 1.72031600  | -3.84221100 | -2.25045900 |
| H | 3.51699600  | -4.51669500 | -0.65958800 |
| H | 3.79231300  | -3.27253900 | 1.48007100  |
| H | 2.32427700  | -1.39084100 | 2.01832800  |
| H | 0.22243500  | -1.95288900 | -1.70478700 |
| H | -3.90360700 | -0.33788200 | 0.66371100  |
| H | -5.33148500 | 1.67996600  | 0.63465900  |
| H | -4.36337400 | 3.90589000  | 0.10476300  |
| H | -2.44367700 | 5.28410600  | -0.49176600 |
| H | -0.02776300 | 5.47941600  | -1.03853800 |
| H | 1.45479200  | 3.50874100  | -0.92458700 |
| H | 0.02062800  | -0.64912300 | 2.72953200  |
| H | 1.21144300  | 0.46523300  | 2.39607500  |
| H | -0.38847000 | 0.89847800  | 2.29170900  |
| N | 0.27898300  | 0.13766000  | 2.13187000  |
| C | -1.86952200 | -1.69974000 | 0.04789200  |
| C | -1.63067100 | -2.72055100 | 0.97400200  |
| C | -2.68911500 | -1.97939900 | -1.05737100 |

|   |             |             |             |
|---|-------------|-------------|-------------|
| C | -2.17946800 | -3.99034300 | 0.79557200  |
| H | -0.98651500 | -2.53070900 | 1.83382100  |
| C | -3.24870800 | -3.24069100 | -1.22546100 |
| H | -2.87548900 | -1.18671000 | -1.78430100 |
| C | -2.99383200 | -4.25684700 | -0.30139900 |
| H | -1.96769100 | -4.77415600 | 1.52445200  |
| H | -3.87901000 | -3.43758000 | -2.09430900 |
| H | -3.42577400 | -5.24870700 | -0.43947900 |
| C | 2.14190900  | 1.21707300  | -0.18922900 |
| C | 2.76273900  | 1.95164500  | 0.83185100  |
| C | 2.93945100  | 0.61129500  | -1.16438200 |
| C | 4.15141200  | 2.05644600  | 0.88947700  |
| H | 2.14188300  | 2.47294900  | 1.56651900  |
| C | 4.32801500  | 0.70958200  | -1.10150700 |
| H | 2.45203800  | 0.04427000  | -1.95755900 |
| C | 4.93934500  | 1.42742700  | -0.07409700 |
| H | 4.61914800  | 2.63280500  | 1.68953200  |
| H | 4.93675400  | 0.21957600  | -1.86288400 |
| H | 6.02655200  | 1.50286700  | -0.02785500 |

### PhB(cordan)

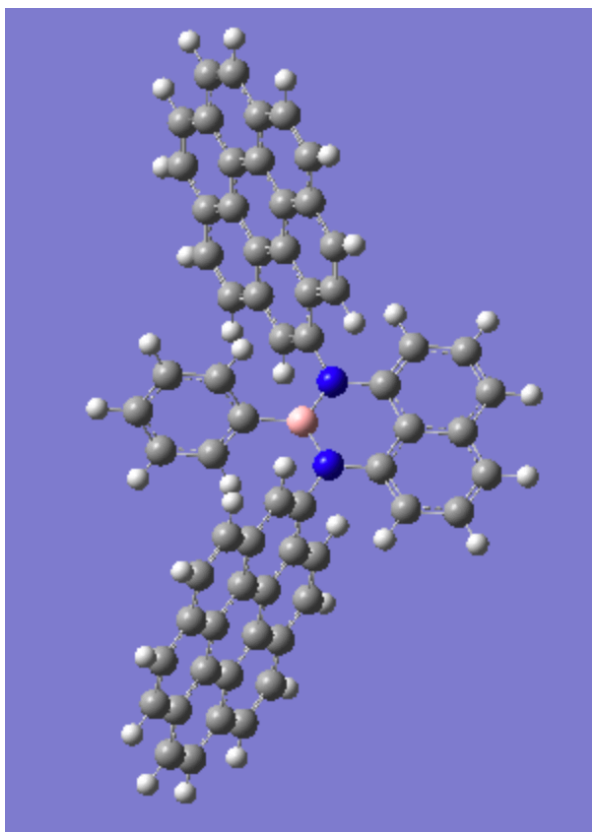

Charge = 0; Multiplicity = 1

[M06-2X/def2-SVP](#)

N–B–N angle = 117.6°

B–N bond: 1.43587 Å, 1.43588 Å

H = -2589.687462 (hartree)

AA = 29.7 (kJ/mol)

|   |             |             |             |
|---|-------------|-------------|-------------|
| C | 0.85214500  | -2.91710300 | -0.85581400 |
| C | -0.00001000 | -3.61794000 | -0.00320700 |
| C | -0.85215900 | -2.91821800 | 0.85031500  |
| C | -0.85428000 | -1.52411600 | 0.84475500  |
| C | -0.00003000 | -0.80041300 | -0.00139400 |
| C | 0.85425300  | -1.52300800 | -0.84845000 |
| B | -0.00001500 | 0.77580800  | -0.00038200 |
| N | -1.19404000 | 1.51966400  | -0.28796100 |
| N | 1.19402200  | 1.51924700  | 0.28828900  |
| C | -1.20579800 | 2.92707500  | -0.32984200 |
| C | 1.20577900  | 2.92660600  | 0.33218900  |
| C | -2.34045200 | 3.64050100  | -0.67774600 |
| C | -2.32172900 | 5.05109300  | -0.68378000 |
| C | -1.18841500 | 5.74668700  | -0.34721000 |
| C | -0.00002200 | 5.05084500  | 0.00265600  |
| C | -0.00000400 | 3.62449600  | 0.00163300  |
| C | 1.18834100  | 5.74621600  | 0.35355900  |
| C | 2.32162900  | 5.05016200  | 0.68925600  |
| C | 2.34037000  | 3.63957900  | 0.68125900  |
| H | 1.52216600  | -3.45771200 | -1.52630600 |
| H | -0.00000600 | -4.70923200 | -0.00392000 |
| H | -1.52215800 | -3.45970400 | 1.52012300  |
| H | -1.53719000 | -0.99229500 | 1.51284800  |
| H | 1.53719600  | -0.99029700 | -1.51580200 |
| H | -3.25456800 | 3.11281800  | -0.94438500 |
| H | -3.23168400 | 5.58686900  | -0.95853200 |
| H | -1.17821400 | 6.83752100  | -0.34434900 |
| H | 1.17811800  | 6.83705200  | 0.35223900  |
| H | 3.23154900  | 5.58556000  | 0.96486200  |
| H | 3.25446600  | 3.11155900  | 0.94728300  |
| C | 2.41436100  | 0.83014600  | 0.57339400  |
| C | 3.43159000  | 0.76046500  | -0.43491600 |
| C | 2.58641900  | 0.21708300  | 1.78540600  |
| C | 4.61352300  | 0.03649400  | -0.15494900 |
| C | 3.28357700  | 1.37814800  | -1.71170800 |

|   |             |             |             |
|---|-------------|-------------|-------------|
| C | 3.76664200  | -0.51949500 | 2.08572000  |
| H | 1.79037500  | 0.28283800  | 2.52942100  |
| C | 5.63922700  | -0.06306200 | -1.14547900 |
| C | 4.78334200  | -0.60793400 | 1.10887500  |
| C | 4.26905800  | 1.28132100  | -2.65760800 |
| H | 2.37112000  | 1.93664600  | -1.92485900 |
| C | 3.95298800  | -1.17120700 | 3.33984100  |
| C | 5.47244500  | 0.56226000  | -2.40257100 |
| C | 6.83328000  | -0.79693100 | -0.86795900 |
| C | 5.97583700  | -1.34218300 | 1.38596900  |
| H | 4.14305000  | 1.76161700  | -3.62985400 |
| C | 5.09750700  | -1.87331800 | 3.60612200  |
| H | 3.16136800  | -1.10069400 | 4.08799100  |
| C | 6.51068800  | 0.45030900  | -3.37369600 |
| C | 7.00236300  | -1.43577400 | 0.39800300  |
| C | 7.84825800  | -0.89331900 | -1.84822800 |
| C | 6.13922400  | -1.97840700 | 2.63853400  |
| H | 5.22841200  | -2.36795000 | 4.57051900  |
| C | 7.65552000  | -0.25015300 | -3.10633600 |
| H | 6.37481500  | 0.93713700  | -4.34136800 |
| C | 8.18356500  | -2.16315100 | 0.67227700  |
| C | 9.03030600  | -1.63138800 | -1.54639400 |
| C | 7.34022700  | -2.70497000 | 2.89025700  |
| H | 8.44287300  | -0.32788300 | -3.85866200 |
| C | 9.19202600  | -2.24286900 | -0.33240200 |
| C | 8.32482700  | -2.79362300 | 1.94365500  |
| H | 9.81040400  | -1.70140200 | -2.30698500 |
| H | 7.46130900  | -3.19390700 | 3.85886500  |
| H | 10.10228100 | -2.80528600 | -0.11542300 |
| H | 9.23890800  | -3.35380700 | 2.15005300  |
| C | -2.41455800 | 0.83105000  | -0.57346500 |
| C | -3.43116200 | 0.75984200  | 0.43537200  |
| C | -2.58742000 | 0.21997600  | -1.78636200 |
| C | -4.61329800 | 0.03635900  | 0.15502200  |
| C | -3.28227800 | 1.37545300  | 1.71306500  |
| C | -3.76792700 | -0.51598100 | -2.08712700 |
| H | -1.79183900 | 0.28687200  | -2.53077100 |
| C | -5.63831800 | -0.06482100 | 1.14609400  |
| C | -4.78398800 | -0.60596900 | -1.10975200 |
| C | -4.26709700 | 1.27705900  | 2.65949300  |
| H | -2.36968500 | 1.93361200  | 1.92650800  |
| C | -3.95519400 | -1.16554800 | -3.34222200 |
| C | -5.47064900 | 0.55840000  | 2.40411000  |

|   |              |             |             |
|---|--------------|-------------|-------------|
| C | -6.83258000  | -0.79820100 | 0.86818200  |
| C | -5.97672500  | -1.33967500 | -1.38726200 |
| H | -4.14041800  | 1.75576000  | 3.63243700  |
| C | -5.09996400  | -1.86709800 | -3.60891400 |
| H | -3.16409000  | -1.09383000 | -4.09080400 |
| C | -6.50819800  | 0.44481200  | 3.37578700  |
| C | -7.00257000  | -1.43488900 | -0.39874200 |
| C | -7.84686700  | -0.89622500 | 1.84900400  |
| C | -6.14102100  | -1.97375700 | -2.64079000 |
| H | -5.23158400  | -2.36006000 | -4.57406800 |
| C | -7.65322300  | -0.25519500 | 3.10806400  |
| H | -6.37162600  | 0.93000600  | 4.34418000  |
| C | -8.18399700  | -2.16174800 | -0.67342200 |
| C | -9.02915200  | -1.63374400 | 1.54675200  |
| C | -7.34224700  | -2.69981500 | -2.89291800 |
| H | -8.44003900  | -0.33419200 | 3.86082000  |
| C | -9.19175000  | -2.24314500 | 0.33183000  |
| C | -8.32618600  | -2.79003700 | -1.94578000 |
| H | -9.80871500  | -1.70502800 | 2.30777300  |
| H | -7.46404100  | -3.18708200 | -3.86227800 |
| H | -10.10217900 | -2.80515700 | 0.11453000  |
| H | -9.24044200  | -3.34981600 | -2.15249800 |

### PhB(cordan)-NH<sub>3</sub>

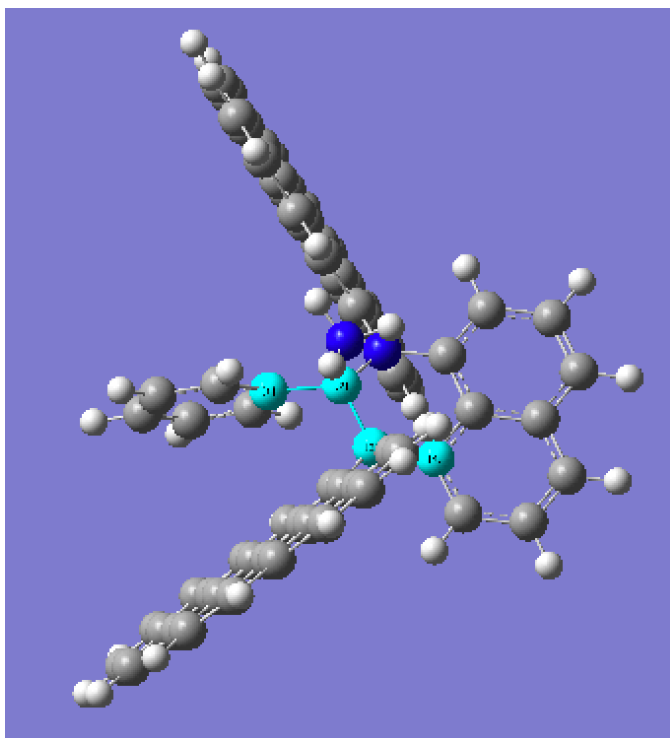



Charge = 0; Multiplicity = 1

[M06-2X/def2-SVP](#)

Dihedral angle = 153.4°

B-N bond: 1.50806 Å, 1.52237 Å

H = -2646.133752 (hartree)

|   |             |             |             |
|---|-------------|-------------|-------------|
| C | 0.82702100  | -2.81666600 | 1.24138800  |
| C | 0.04890000  | -3.75414800 | 0.55937300  |
| C | -0.76499700 | -3.33435600 | -0.48948200 |
| C | -0.79550500 | -1.98523000 | -0.84905500 |
| C | -0.02865700 | -1.02346700 | -0.17929300 |
| C | 0.78398800  | -1.47369500 | 0.87387100  |
| B | -0.13476000 | 0.55823300  | -0.46007200 |
| N | 1.17512500  | 1.30533600  | -0.47694400 |
| N | -1.16485400 | 1.27291800  | 0.40349200  |
| C | 1.17949700  | 2.70208900  | -0.39522000 |
| C | -1.05778100 | 2.61989900  | 0.72343700  |
| C | 2.23941300  | 3.46115400  | -0.87450800 |
| C | 2.25997200  | 4.85986900  | -0.69948100 |
| C | 1.24100900  | 5.50700700  | -0.04614600 |
| C | 0.12992000  | 4.77251900  | 0.45019700  |
| C | 0.07583600  | 3.36115900  | 0.24348600  |
| C | -0.91494200 | 5.41521100  | 1.16632200  |
| C | -1.95227600 | 4.67323200  | 1.67598200  |
| C | -2.03165800 | 3.28329800  | 1.46262000  |
| H | 1.47076800  | -3.13495700 | 2.06334300  |
| H | 0.07768200  | -4.80674800 | 0.84579300  |
| H | -1.38485300 | -4.05542600 | -1.02508600 |
| H | -1.47447900 | -1.69371900 | -1.65765100 |
| H | 1.38986300  | -0.75118200 | 1.42731400  |
| H | 3.07529200  | 2.96530000  | -1.36722800 |
| H | 3.11143100  | 5.42582700  | -1.08148900 |
| H | 1.26969000  | 6.58615300  | 0.11163600  |
| H | -0.86530800 | 6.49447800  | 1.31640600  |
| H | -2.74321600 | 5.16163000  | 2.24816100  |
| H | -2.87884900 | 2.72399800  | 1.85832100  |
| H | -0.28766100 | 0.10685400  | -2.72338000 |
| H | -1.77041400 | 0.52977300  | -2.10499900 |
| H | -0.61776100 | 1.69122800  | -2.35509200 |
| N | -0.76471300 | 0.72182400  | -2.06195800 |
| C | 2.41122000  | 0.65689300  | -0.71891500 |
| C | 3.43854000  | 0.70489400  | 0.29222400  |
| C | 2.64070700  | -0.03974800 | -1.87925100 |

|   |             |             |             |
|---|-------------|-------------|-------------|
| C | 4.66930200  | 0.05146400  | 0.05601700  |
| C | 3.24073700  | 1.37101800  | 1.53765700  |
| C | 3.86271700  | -0.72559300 | -2.12955300 |
| H | 1.87137200  | -0.06649500 | -2.65285000 |
| C | 5.70203500  | 0.09254100  | 1.04467900  |
| C | 4.88697400  | -0.66820100 | -1.15982600 |
| C | 4.23005500  | 1.40626400  | 2.48362300  |
| H | 2.28176300  | 1.85266500  | 1.73139900  |
| C | 4.09354900  | -1.45042000 | -3.33493000 |
| C | 5.48926900  | 0.77924600  | 2.26176000  |
| C | 6.94969700  | -0.56273600 | 0.80715700  |
| C | 6.13008300  | -1.32794400 | -1.39557800 |
| H | 4.06148900  | 1.92162800  | 3.43112700  |
| C | 5.28691700  | -2.08187400 | -3.56279700 |
| H | 3.29729200  | -1.49436900 | -4.08075500 |
| C | 6.53600500  | 0.81364800  | 3.23008200  |
| C | 7.16537400  | -1.27171900 | -0.41352000 |
| C | 7.97264400  | -0.51289100 | 1.78290300  |
| C | 6.33794100  | -2.03762800 | -2.60151200 |
| H | 5.45017300  | -2.63285100 | -4.49113400 |
| C | 7.73329800  | 0.19345100  | 2.99850000  |
| H | 6.36288100  | 1.34832000  | 4.16605600  |
| C | 8.39915000  | -1.92145200 | -0.64823700 |
| C | 9.20891900  | -1.17254900 | 1.52041900  |
| C | 7.59133100  | -2.68432100 | -2.81360900 |
| H | 8.52715300  | 0.22856000  | 3.74724100  |
| C | 9.41502000  | -1.85087500 | 0.34936400  |
| C | 8.58440700  | -2.62755400 | -1.87376900 |
| H | 9.99492100  | -1.12772100 | 2.27690600  |
| H | 7.74571400  | -3.23010700 | -3.74656200 |
| H | 10.36672000 | -2.35232100 | 0.16271900  |
| H | 9.53919400  | -3.12711700 | -2.04929100 |
| C | -2.39996300 | 0.60623800  | 0.63461200  |
| C | -3.55358800 | 0.92074400  | -0.17158000 |
| C | -2.47197300 | -0.40766700 | 1.55733100  |
| C | -4.72928600 | 0.14394900  | -0.02432200 |
| C | -3.56036200 | 1.98950200  | -1.12140800 |
| C | -3.64059400 | -1.20057000 | 1.71927600  |
| H | -1.58676300 | -0.63328700 | 2.15314300  |
| C | -5.87816200 | 0.41861600  | -0.83200800 |
| C | -4.77300000 | -0.92586000 | 0.92129500  |
| C | -4.66212900 | 2.24991200  | -1.89279800 |
| H | -2.68132900 | 2.63027000  | -1.20439600 |

|   |              |             |             |
|---|--------------|-------------|-------------|
| C | -3.69537700  | -2.27783800 | 2.65218700  |
| C | -5.84908700  | 1.47236400  | -1.77449100 |
| C | -7.06027100  | -0.37261600 | -0.69106300 |
| C | -5.95256300  | -1.71731100 | 1.06147900  |
| H | -4.64825700  | 3.07891500  | -2.60335200 |
| C | -4.82671900  | -3.03618000 | 2.78706700  |
| H | -2.81015600  | -2.48951300 | 3.25466900  |
| C | -7.00574500  | 1.72875100  | -2.56774200 |
| C | -7.09804400  | -1.44065400 | 0.25599400  |
| C | -8.19495700  | -0.09931600 | -1.49072200 |
| C | -5.98604900  | -2.77655100 | 1.99824900  |
| H | -4.85666000  | -3.85855500 | 3.50451200  |
| C | -8.13672600  | 0.97100900  | -2.43091700 |
| H | -6.97314500  | 2.54732100  | -3.28941600 |
| C | -8.26729400  | -2.22375200 | 0.39549600  |
| C | -9.36177400  | -0.90293700 | -1.33052600 |
| C | -7.17735200  | -3.55063200 | 2.11969100  |
| H | -9.01683500  | 1.17725500  | -3.04310300 |
| C | -9.39678000  | -1.92600800 | -0.42189200 |
| C | -8.27644600  | -3.28448700 | 1.34834000  |
| H | -10.23403200 | -0.68584900 | -1.95014800 |
| H | -7.19775800  | -4.36638600 | 2.84502600  |
| H | -10.29741200 | -2.53287200 | -0.30971100 |
| H | -9.18196600  | -3.88538200 | 1.45256100  |

### PhB(eedan)

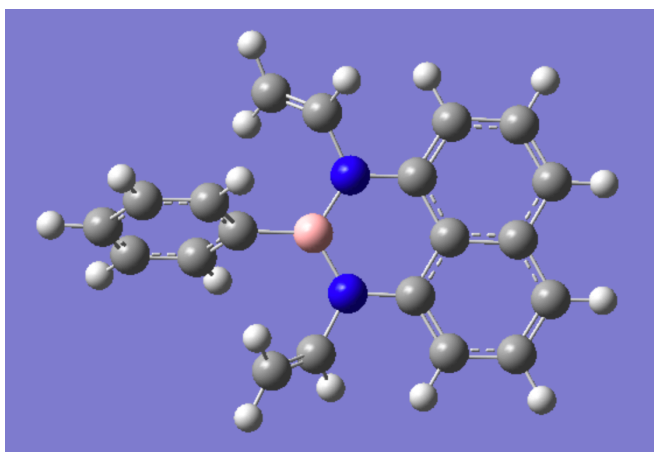

Charge = 0; Multiplicity = 1

M06-2X/def2-SVP

N–B–N angle = 117.7°

B–N bond: 1.43990 Å, 1.43989 Å

H = -905.402093 (hartree)

AA = 49.2 (kJ/mol)

|   |             |             |             |
|---|-------------|-------------|-------------|
| C | -4.41512300 | -0.40926300 | -1.13361100 |
| C | -5.11571300 | 0.00003400  | 0.00068900  |
| C | -4.41446300 | 0.40934600  | 1.13458200  |
| C | -3.02026100 | 0.41630100  | 1.12707700  |
| C | -2.29867600 | 0.00002900  | -0.00014700 |
| C | -3.02091300 | -0.41622800 | -1.12693400 |
| B | -0.72028200 | 0.00001800  | -0.00028900 |
| N | 0.02432500  | 1.23082700  | 0.06279300  |
| N | 0.02430400  | -1.23080000 | -0.06326600 |
| C | 1.43065700  | 1.24615400  | -0.00004500 |
| C | 1.43061600  | -1.24616400 | -0.00009800 |
| C | 2.14441300  | 2.43200600  | -0.07229300 |
| C | 3.55532900  | 2.41833000  | -0.08723300 |
| C | 4.25210200  | 1.23818200  | -0.03903400 |
| C | 3.55641000  | -0.00004300 | 0.00018600  |
| C | 2.13108100  | -0.00001800 | 0.00001500  |
| C | 4.25205400  | -1.23829200 | 0.03956200  |
| C | 3.55522900  | -2.41841800 | 0.08756100  |
| C | 2.14431500  | -2.43204300 | 0.07228200  |
| H | -4.95734700 | -0.73038500 | -2.02464500 |
| H | -6.20696800 | 0.00003200  | 0.00100200  |
| H | -4.95616600 | 0.73047800  | 2.02592900  |
| H | -2.48419400 | 0.75918100  | 2.01612000  |
| H | -2.48537600 | -0.75910600 | -2.01629600 |
| H | 1.62002900  | 3.38292500  | -0.13724700 |
| H | 4.08987800  | 3.36821700  | -0.13825300 |
| H | 5.34294200  | 1.22830200  | -0.03976600 |
| H | 5.34289300  | -1.22845400 | 0.04056500  |
| H | 4.08973400  | -3.36832500 | 0.13867700  |
| H | 1.61988300  | -3.38294900 | 0.13707000  |
| C | -0.59948000 | -2.49177500 | -0.25601200 |
| C | -1.59214900 | -2.98179300 | 0.48147100  |
| H | -0.18877500 | -3.06729800 | -1.09309500 |
| H | -2.03864100 | -3.94142400 | 0.22038600  |
| H | -2.00176300 | -2.43273000 | 1.33054400  |
| C | -0.59946500 | 2.49183800  | 0.25523800  |
| C | -1.59198700 | 2.98177700  | -0.48249600 |
| H | -0.18897300 | 3.06744800  | 1.09236100  |
| H | -2.03854600 | 3.94142000  | -0.22157000 |
| H | -2.00145600 | 2.43263000  | -1.33158300 |

## PhB(eedan)-NH<sub>3</sub>

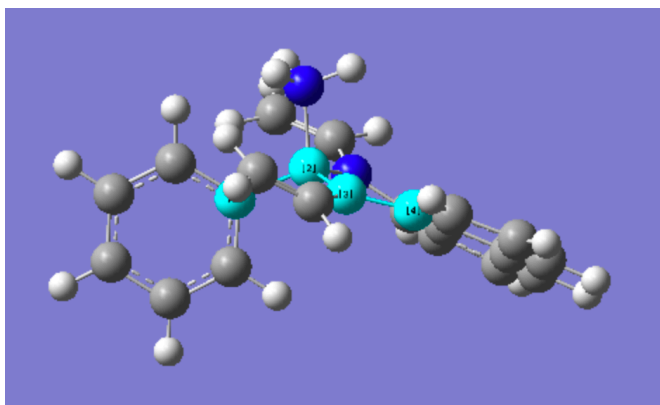

Charge = 0; Multiplicity = 1

M06-2X/def2-SVP

Dihedral angle = 139.7°

B-N bond: 1.53350 Å, 1.52431 Å

H = -961.855812 (hartree)

|   |             |             |             |
|---|-------------|-------------|-------------|
| C | -3.20477700 | 0.38593400  | -2.31357600 |
| C | -4.47534700 | 0.23902300  | -1.75647500 |
| C | -4.59880300 | -0.03821200 | -0.39657400 |
| C | -3.45409500 | -0.16997600 | 0.39095100  |
| C | -2.16759500 | -0.03050700 | -0.14403000 |
| C | -2.07162600 | 0.25531200  | -1.51296800 |
| B | -0.77293000 | -0.13300500 | 0.66920300  |
| N | 0.03733000  | 1.16869800  | 0.64349000  |
| N | 0.08443100  | -1.32821600 | 0.26928100  |
| C | 1.30513900  | 1.24247300  | 0.06093900  |
| C | 1.47571400  | -1.24023500 | 0.13802300  |
| C | 1.86869400  | 2.45230000  | -0.32345300 |
| C | 3.21456700  | 2.52073600  | -0.74166900 |
| C | 4.00048700  | 1.39677900  | -0.77886300 |
| C | 3.44439700  | 0.12968300  | -0.45353200 |
| C | 2.07178500  | 0.04301300  | -0.08547300 |
| C | 4.23338600  | -1.05221500 | -0.48433600 |
| C | 3.67106300  | -2.25798300 | -0.15144900 |
| C | 2.29832700  | -2.36034400 | 0.16083200  |
| H | -3.09829500 | 0.60697700  | -3.37716700 |
| H | -5.36545800 | 0.34263400  | -2.37909600 |
| H | -5.58720900 | -0.15354700 | 0.05188600  |
| H | -3.59402300 | -0.38448300 | 1.45769100  |
| H | -1.08088800 | 0.37889500  | -1.96046800 |
| H | 1.26773600  | 3.36024200  | -0.30571700 |

|   |             |             |             |
|---|-------------|-------------|-------------|
| H | 3.62927600  | 3.48935100  | -1.02600300 |
| H | 5.05032200  | 1.45190100  | -1.07031900 |
| H | 5.28628200  | -0.97680600 | -0.75971500 |
| H | 4.28142700  | -3.16267300 | -0.13900300 |
| H | 1.88723500  | -3.33563600 | 0.41472700  |
| H | -1.57552300 | 0.46958300  | 2.67138200  |
| H | -1.65525000 | -1.19591900 | 2.45921200  |
| H | -0.20268300 | -0.46247200 | 2.76835800  |
| N | -1.09968000 | -0.35581100 | 2.28973200  |
| C | -0.44044800 | 2.31459200  | 1.26634700  |
| C | -1.70394200 | 2.62711000  | 1.61043400  |
| H | 0.35422700  | 3.01095700  | 1.55519300  |
| H | -1.87426100 | 3.54841900  | 2.16587900  |
| H | -2.57315800 | 2.05020700  | 1.29627800  |
| C | -0.49089000 | -2.57528300 | 0.03464300  |
| C | -1.67261200 | -3.05115700 | 0.45406700  |
| H | 0.11685100  | -3.22414800 | -0.60200700 |
| H | -1.98948900 | -4.03715400 | 0.11753200  |
| H | -2.38756000 | -2.49025800 | 1.05478600  |

### PhB(eydan)

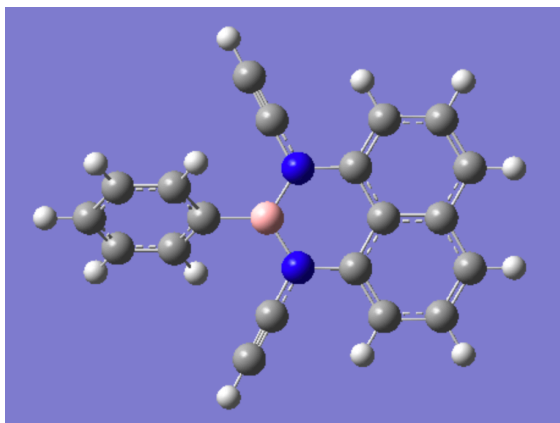

Charge = 0; Multiplicity = 1

M06-2X/def2-SVP

N–B–N angle = 116.6°

B–N bond: 1.44486 Å, 1.44486 Å

H = -902.956180 (hartree)

AA = 71.4 (kJ/mol)

|   |             |             |             |
|---|-------------|-------------|-------------|
| C | -4.48244000 | 0.74991800  | 0.94554000  |
| C | -5.18120000 | 0.00000400  | 0.00003600  |
| C | -4.48248600 | -0.74991900 | -0.94549600 |

|   |             |             |             |
|---|-------------|-------------|-------------|
| C | -3.08914300 | -0.75685100 | -0.93650000 |
| C | -2.36846300 | -0.00002200 | -0.00001300 |
| C | -3.08909800 | 0.75682700  | 0.93649400  |
| B | -0.80229600 | -0.00002000 | -0.00002500 |
| N | -0.04307500 | -1.22827000 | 0.05088800  |
| N | -0.04310100 | 1.22824700  | -0.05093900 |
| C | 1.37919700  | -1.24966500 | 0.03566800  |
| C | 1.37917100  | 1.24967200  | -0.03569100 |
| C | 2.08346400  | -2.43477700 | 0.06468700  |
| C | 3.49523200  | -2.42134800 | 0.06060200  |
| C | 4.18857400  | -1.23863700 | 0.03064700  |
| C | 3.49324100  | 0.00002600  | 0.00000800  |
| C | 2.06750600  | 0.00001100  | -0.00000600 |
| C | 4.18855000  | 1.23870200  | -0.03061700 |
| C | 3.49518300  | 2.42139800  | -0.06058300 |
| C | 2.08341500  | 2.43479900  | -0.06469400 |
| H | -5.02495400 | 1.33582200  | 1.68912200  |
| H | -6.27257300 | 0.00001400  | 0.00005500  |
| H | -5.02503500 | -1.33581000 | -1.68906100 |
| H | -2.55389200 | -1.36317600 | -1.67086000 |
| H | -2.55381000 | 1.36314900  | 1.67083000  |
| H | 1.54404700  | -3.37969600 | 0.09352100  |
| H | 4.03102300  | -3.37122800 | 0.08385700  |
| H | 5.27939500  | -1.22727600 | 0.03031800  |
| H | 5.27937100  | 1.22736400  | -0.03026700 |
| H | 4.03095600  | 3.37129000  | -0.08382500 |
| H | 1.54398000  | 3.37970700  | -0.09353700 |
| C | -0.68793000 | 2.41785000  | -0.16563600 |
| C | -1.23972700 | 3.48760700  | -0.26888500 |
| H | -1.74867000 | 4.42697300  | -0.36531600 |
| C | -0.68787600 | -2.41789000 | 0.16556400  |
| C | -1.23961100 | -3.48767100 | 0.26891300  |
| H | -1.74848000 | -4.42707200 | 0.36539900  |

### PhB(eydan)-NH<sub>3</sub>

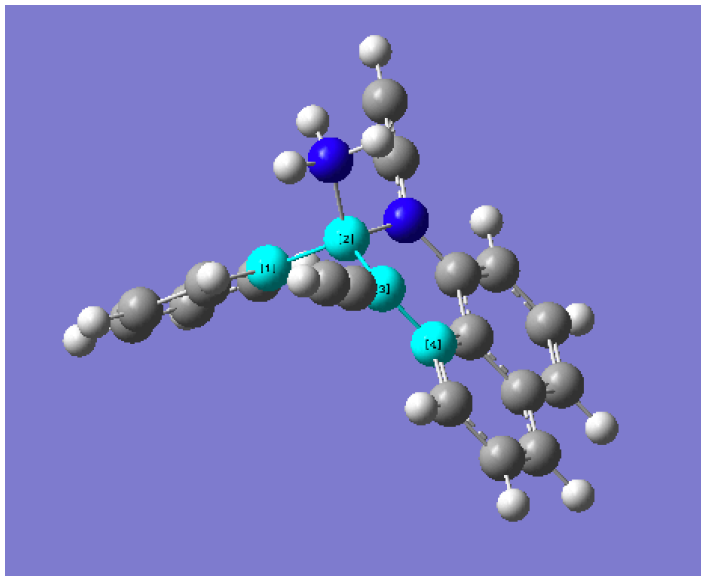

Charge = 0; Multiplicity = 1

M06-2X/def2-SVP

Dihedral angle = 91.4°

B-N bond: 1.53355 Å, 1.53757 Å

H = -959.418340 (hartree)

|   |             |             |             |
|---|-------------|-------------|-------------|
| C | -2.93458300 | 1.34129500  | -2.17537900 |
| C | -3.88039600 | 0.34101600  | -2.39205200 |
| C | -3.88572500 | -0.79024600 | -1.57568700 |
| C | -2.95057000 | -0.91073500 | -0.54899400 |
| C | -1.99393200 | 0.08975100  | -0.30441000 |
| C | -2.00549600 | 1.21437700  | -1.14169900 |
| B | -0.91279200 | -0.05831200 | 0.88327500  |
| N | 0.01875800  | 1.14785700  | 1.05398000  |
| N | -0.04584800 | -1.32742300 | 0.83975400  |
| C | 1.25693500  | 1.18566800  | 0.38843100  |
| C | 1.18946600  | -1.31415200 | 0.16826300  |
| C | 1.92877200  | 2.37489100  | 0.17685500  |
| C | 3.17123300  | 2.38419900  | -0.49169100 |
| C | 3.73735300  | 1.21854100  | -0.94221900 |
| C | 3.08166700  | -0.02506300 | -0.73239800 |
| C | 1.82143600  | -0.05022600 | -0.06545900 |
| C | 3.67301900  | -1.24571500 | -1.15573100 |
| C | 3.04442700  | -2.44074400 | -0.91035100 |
| C | 1.80049100  | -2.48203400 | -0.24707900 |
| H | -2.91841700 | 2.22534300  | -2.81525700 |
| H | -4.60855100 | 0.43873800  | -3.19911900 |



|   |             |             |             |
|---|-------------|-------------|-------------|
| H | -4.61527000 | -1.58406700 | -1.74612700 |
| H | -2.95507700 | -1.82194200 | 0.05788800  |
| H | -1.26963200 | 2.00782800  | -0.98715300 |
| H | 1.48596800  | 3.30633500  | 0.52956100  |
| H | 3.67915600  | 3.33706400  | -0.64885600 |
| H | 4.69856500  | 1.22370000  | -1.45816900 |
| H | 4.63524700  | -1.21197700 | -1.66869200 |
| H | 3.50280500  | -3.37729500 | -1.23193200 |
| H | 1.30590700  | -3.43545000 | -0.06211000 |
| H | -2.23660800 | 0.71730400  | 2.44325400  |
| H | -2.39703600 | -0.93963800 | 2.25092500  |
| H | -1.08459200 | -0.31804500 | 3.06256400  |
| N | -1.73265800 | -0.16125900 | 2.28493200  |
| C | -0.50528600 | 2.26686200  | 1.57219600  |
| C | -1.03845000 | 3.23288900  | 2.08098500  |
| H | -1.49199500 | 4.10732400  | 2.50471500  |
| C | -0.59234700 | -2.48757800 | 1.22417600  |
| C | -1.12854200 | -3.50053500 | 1.62917600  |
| H | -1.58510200 | -4.41265100 | 1.95986100  |

### **–Methylboronic acid derivatives–**

All the structures of methylboronic acid derivatives and their ammonia adducts were optimized starting from the geometries based on the respective phenylboronic acid derivatives and ammonia adducts optimized at the M06-2X/def2-SVP level of theory.

#### MeB(dan)

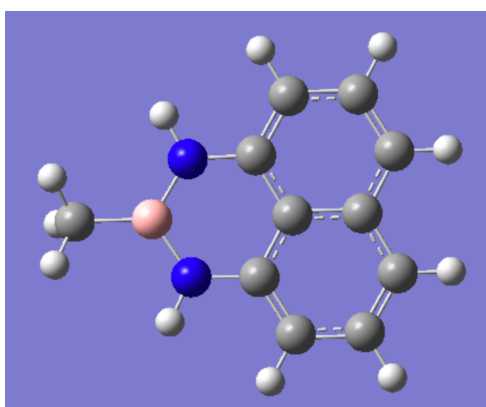

Charge = 0; Multiplicity = 1

M06-2X/def2-SVP

N–B–N angle = 115.4°

B–N bond: 1.42565 Å, 1.42566 Å

H = -559.423684 (hartree)

AA = 10.1 (kJ/mol)

|   |             |             |             |
|---|-------------|-------------|-------------|
| B | 2.45848100  | 0.00005500  | -0.01262000 |
| N | 1.69691300  | -1.20515300 | -0.01420500 |
| N | 1.69687900  | 1.20522600  | -0.01429900 |
| C | 0.30688900  | -1.24343300 | -0.00655000 |
| C | 0.30684700  | 1.24345200  | -0.00657000 |
| C | -0.39787500 | -2.43455100 | -0.00349900 |
| C | -1.80829800 | -2.42495700 | 0.00335700  |
| C | -2.51223500 | -1.24479900 | 0.00718800  |
| C | -1.82488000 | -0.00002300 | 0.00409700  |
| C | -0.40106900 | -0.00000100 | -0.00251700 |
| C | -2.51227300 | 1.24473300  | 0.00720900  |
| C | -1.80837400 | 2.42491400  | 0.00340100  |
| C | -0.39795000 | 2.43454900  | -0.00347200 |
| H | 2.15424600  | -2.10778900 | -0.01752200 |
| H | 2.15416400  | 2.10788500  | -0.01782100 |
| H | 0.14597600  | -3.38088500 | -0.00648000 |
| H | -2.34240700 | -3.37670800 | 0.00567700  |
| H | -3.60307200 | -1.24383300 | 0.01245700  |
| H | -3.60311000 | 1.24373200  | 0.01247600  |
| H | -2.34251100 | 3.37664800  | 0.00575300  |
| H | 0.14587200  | 3.38089900  | -0.00644900 |
| C | 4.03674500  | 0.00001000  | 0.02122200  |
| H | 4.39185300  | -0.00051300 | 1.06421100  |
| H | 4.46238200  | -0.88852200 | -0.46685200 |
| H | 4.46249900  | 0.88894200  | -0.46601500 |

### MeB(dan)–NH<sub>3</sub>

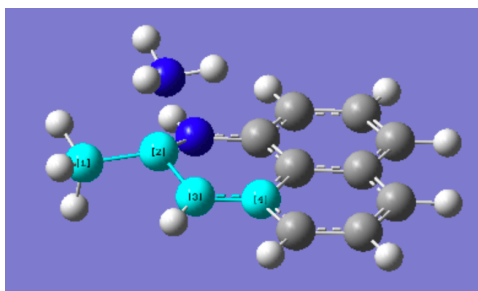

Charge = 0; Multiplicity = 1

M06-2X/def2-SVP

Dihedral angle = 167.3°

B–N bond: 1.48521 Å, 1.48517 Å

H = -615.862503 (hartree)

|   |             |             |             |
|---|-------------|-------------|-------------|
| B | -2.23895500 | 0.00000800  | -0.15374200 |
| N | -1.43294800 | 1.22307600  | -0.39931100 |
| N | -1.43294500 | -1.22281200 | -0.40030300 |
| C | -0.06730700 | 1.24917100  | -0.23369400 |
| C | -0.06738000 | -1.24908200 | -0.23396800 |
| C | 0.65451900  | 2.43714800  | -0.18279400 |
| C | 2.05050300  | 2.42242400  | -0.00053000 |
| C | 2.74173600  | 1.24085900  | 0.12959100  |
| C | 2.05117500  | -0.00004500 | 0.06142800  |
| C | 0.63529500  | 0.00001600  | -0.11042100 |
| C | 2.74160900  | -1.24103000 | 0.12968600  |
| C | 2.05027300  | -2.42253000 | -0.00035700 |
| C | 0.65429600  | -2.43712400 | -0.18280100 |
| H | -1.86994600 | 2.12057600  | -0.56098600 |
| H | -1.87001100 | -2.12034800 | -0.56161200 |
| H | 0.12363300  | 3.38598300  | -0.28394400 |
| H | 2.58712300  | 3.37261300  | 0.03842300  |
| H | 3.82393400  | 1.23514700  | 0.26682500  |
| H | 3.82380500  | -1.23540700 | 0.26694600  |
| H | 2.58678700  | -3.37277300 | 0.03875500  |
| H | 0.12334300  | -3.38591100 | -0.28404800 |
| H | -2.85517300 | 0.83019800  | 2.02142600  |
| H | -2.85598700 | -0.83003500 | 2.02220200  |
| H | -1.42455900 | -0.00056900 | 2.01558500  |
| N | -2.38444900 | -0.00031700 | 1.66046900  |
| C | -3.75235300 | 0.00020900  | -0.67330500 |
| H | -4.31556800 | -0.88737500 | -0.34029700 |
| H | -4.31551000 | 0.88768000  | -0.33989400 |
| H | -3.76890400 | 0.00046000  | -1.77366400 |

## MeB(aam)

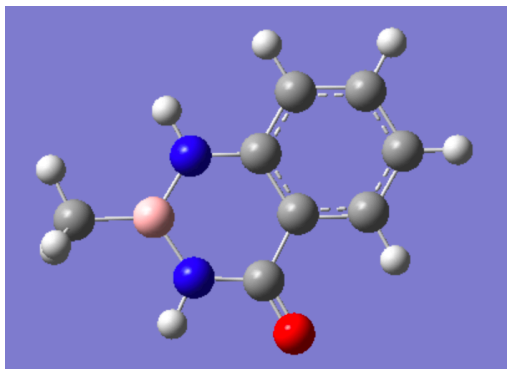

Charge = 0; Multiplicity = 1

### M06-2X/def2-SVP

N–B–N angle = 115.4°

B–N bond: 1.42372 Å, 1.43498 Å

H = -519.215609 (hartree)

AA = 16.7 (kJ/mol)

|   |             |             |             |
|---|-------------|-------------|-------------|
| B | -2.05780400 | -0.51137300 | -0.00047800 |
| N | -0.90799900 | -1.35096900 | -0.00059900 |
| N | -1.79122600 | 0.89862400  | -0.00038000 |
| C | 0.38763700  | -0.85799800 | -0.00027600 |
| C | -0.53912000 | 1.49252700  | -0.00014100 |
| C | 1.50019500  | -1.71547400 | -0.00016500 |
| C | 2.78531700  | -1.19283700 | 0.00016800  |
| C | 2.99674000  | 0.19150200  | 0.00037400  |
| C | 1.90221900  | 1.04350800  | 0.00026200  |
| C | 0.59925000  | 0.53411200  | -0.00004200 |
| O | -0.39659900 | 2.69522200  | -0.00003900 |
| H | -0.99777600 | -2.35891900 | -0.00080200 |
| H | -2.54161200 | 1.58255700  | -0.00046000 |
| H | 1.34228000  | -2.79595100 | -0.00032500 |
| H | 3.63796400  | -1.87399300 | 0.00026600  |
| H | 4.01018400  | 0.59280800  | 0.00062500  |
| H | 2.01387400  | 2.12884700  | 0.00041600  |
| C | -3.52885300 | -1.07749300 | 0.00068500  |
| H | -3.56586100 | -2.17548200 | -0.01005400 |
| H | -4.07669400 | -0.73173300 | 0.89084800  |
| H | -4.08628400 | -0.71371900 | -0.87615100 |

### MeB(aam)-NH<sub>3</sub>

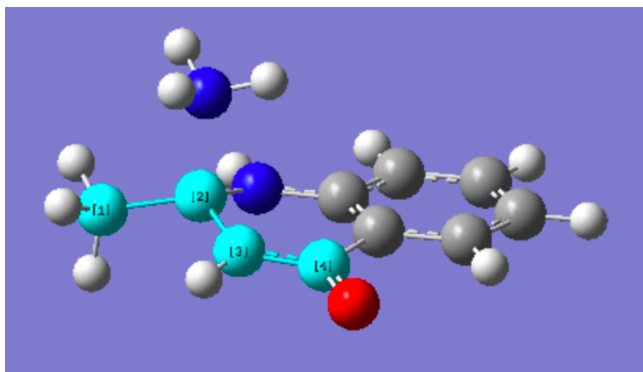

Charge = 0; Multiplicity = 1

M06-2X/def2-SVP

Dihedral angle = 161.7°

B-N bond: 1.48900 Å, 1.49744 Å

H = -575.656935 (hartree)

|   |             |             |             |
|---|-------------|-------------|-------------|
| B | 1.87317600  | -0.35918400 | -0.14040900 |
| N | 0.71286900  | -1.25246700 | -0.41034900 |
| N | 1.49017700  | 1.07982000  | -0.29825600 |
| C | -0.58043600 | -0.82995600 | -0.23163100 |
| C | 0.22378700  | 1.58086600  | -0.17504300 |
| C | -1.66760900 | -1.72900800 | -0.22147800 |
| C | -2.96174100 | -1.27488900 | -0.01482100 |
| C | -3.22425900 | 0.08567400  | 0.18665200  |
| C | -2.16498800 | 0.98249000  | 0.15773600  |
| C | -0.85214200 | 0.54704800  | -0.04636400 |
| O | -0.02223800 | 2.77350900  | -0.18044700 |
| H | 0.83465300  | -2.22599000 | -0.65472200 |
| H | 2.18180600  | 1.80543000  | -0.45561800 |
| H | -1.47486500 | -2.79317400 | -0.37589500 |
| H | -3.78300500 | -1.99438700 | -0.00958100 |
| H | -4.24432900 | 0.43435800  | 0.34769300  |
| H | -2.31536600 | 2.05731700  | 0.27296400  |
| H | 2.35274400  | -1.44578700 | 1.91795800  |
| H | 2.77964500  | 0.15758400  | 1.98436800  |
| H | 1.18610800  | -0.27786400 | 2.05432700  |
| N | 2.08818000  | -0.50358400 | 1.62724800  |
| C | 3.28413000  | -0.80197000 | -0.75439900 |
| H | 4.11744400  | -0.16917000 | -0.40671200 |
| H | 3.54405300  | -1.84615100 | -0.51212500 |
| H | 3.25409900  | -0.72222800 | -1.85145200 |

## MeB(mdan)

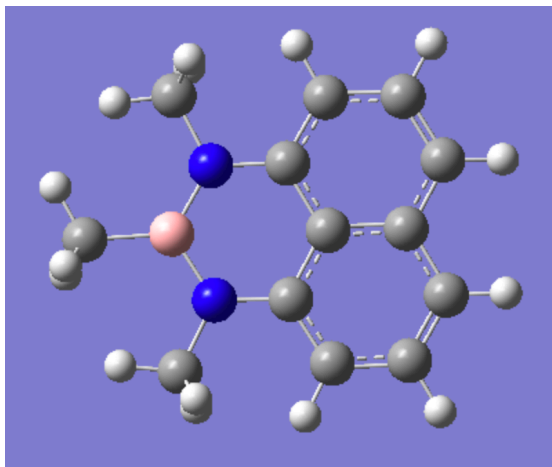

Charge = 0; Multiplicity = 1

M06-2X/def2-SVP

N–B–N angle = 117.7°

B–N bond: 1.43654 Å, 1.43793 Å

H = -637.869867 (hartree)

AA = 18.3 (kJ/mol)

|   |             |             |             |
|---|-------------|-------------|-------------|
| B | 2.10481500  | 0.04719100  | -0.00003200 |
| N | 1.38197900  | -1.19585500 | -0.00003200 |
| N | 1.34061500  | 1.26359200  | 0.00012800  |
| C | -0.01387700 | -1.24349700 | 0.00007600  |
| C | -0.05995200 | 1.25097800  | -0.00001600 |
| C | -0.71242300 | -2.44461500 | 0.00017600  |
| C | -2.12274600 | -2.45541800 | 0.00017700  |
| C | -2.84104800 | -1.28796800 | 0.00006900  |
| C | -2.16643800 | -0.03755600 | -0.00002600 |
| C | -0.74099800 | -0.00954100 | 0.00001000  |
| C | -2.88915600 | 1.18539200  | -0.00015400 |
| C | -2.21623500 | 2.37936100  | -0.00024900 |
| C | -0.80647300 | 2.42309500  | -0.00017300 |
| C | 1.95392600  | 2.57728500  | 0.00048800  |
| C | 2.06448700  | -2.47453900 | -0.00015800 |
| H | -0.18569000 | -3.39489400 | 0.00024300  |
| H | -2.64024000 | -3.41631400 | 0.00025600  |
| H | -3.93184800 | -1.29693700 | 0.00004900  |
| H | -3.97951100 | 1.15226700  | -0.00018100 |
| H | -2.77007300 | 3.31975200  | -0.00037200 |
| H | -0.31993700 | 3.39420100  | -0.00025400 |
| H | 3.04100700  | 2.49135000  | 0.00096200  |

|   |            |             |             |
|---|------------|-------------|-------------|
| H | 1.65239600 | 3.15208200  | -0.88949200 |
| H | 1.65164400 | 3.15185500  | 0.89035600  |
| H | 3.14651800 | -2.32686400 | -0.00035700 |
| H | 1.79527900 | -3.06555100 | 0.88992400  |
| H | 1.79494800 | -3.06555100 | -0.89014100 |
| C | 3.69302600 | 0.01444800  | -0.00028200 |
| H | 4.06309300 | -0.53098400 | 0.88211600  |
| H | 4.06269400 | -0.53119600 | -0.88271800 |
| H | 4.18493000 | 0.99212000  | -0.00054500 |

### MeB(mdan)-NH<sub>3</sub>

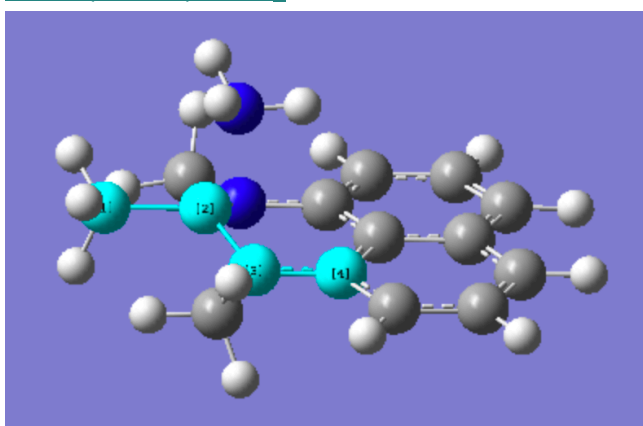

Charge = 0; Multiplicity = 1

M06-2X/def2-SVP

Dihedral angle = 178.9°

B-N bond: 1.50127 Å, 1.50127 Å

H = -694.311818 (hartree)

|   |             |             |             |
|---|-------------|-------------|-------------|
| B | -1.93269400 | 0.00000000  | 0.07373700  |
| N | -1.19380700 | 1.24110400  | -0.33554300 |
| N | -1.19380700 | -1.24110500 | -0.33554300 |
| C | 0.18026000  | 1.25612400  | -0.20518500 |
| C | 0.18026000  | -1.25612400 | -0.20518500 |
| C | 0.91612500  | 2.44113200  | -0.16810600 |
| C | 2.31546700  | 2.41843200  | -0.00608800 |
| C | 3.00049700  | 1.23573100  | 0.11522700  |
| C | 2.29984800  | 0.00000000  | 0.05919900  |
| C | 0.88111600  | 0.00000000  | -0.08925000 |
| C | 3.00049700  | -1.23573000 | 0.11522700  |
| C | 2.31546700  | -2.41843100 | -0.00608800 |
| C | 0.91612500  | -2.44113200 | -0.16810500 |
| C | -1.85614600 | -2.49888700 | -0.57188000 |

|   |             |             |             |
|---|-------------|-------------|-------------|
| C | -1.85614700 | 2.49888700  | -0.57188000 |
| H | 0.41306000  | 3.40143100  | -0.25519900 |
| H | 2.85578000  | 3.36682400  | 0.02435600  |
| H | 4.08469100  | 1.22086500  | 0.23503500  |
| H | 4.08469200  | -1.22086400 | 0.23503500  |
| H | 2.85578000  | -3.36682300 | 0.02435700  |
| H | 0.41306100  | -3.40143100 | -0.25519900 |
| H | -2.90942900 | -2.32628800 | -0.81524800 |
| H | -1.39842500 | -3.02836500 | -1.42292800 |
| H | -1.80955500 | -3.18581900 | 0.29741500  |
| H | -2.90943000 | 2.32628700  | -0.81524800 |
| H | -1.80955600 | 3.18581800  | 0.29741500  |
| H | -1.39842600 | 3.02836500  | -1.42292900 |
| H | -2.10867400 | 0.83032500  | 2.29372300  |
| H | -2.10867400 | -0.83032500 | 2.29372400  |
| H | -0.70070200 | 0.00000000  | 2.02578200  |
| N | -1.71076000 | 0.00000000  | 1.85311800  |
| C | -3.52656000 | 0.00000000  | -0.11266000 |
| H | -4.00191800 | 0.88281900  | 0.34302300  |
| H | -3.79913400 | -0.00000100 | -1.18040700 |
| H | -4.00191800 | -0.88281800 | 0.34302500  |

### MeB(pin)

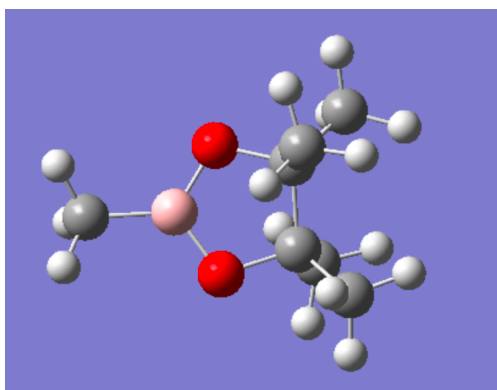

Charge = 0; Multiplicity = 1

M06-2X/def2-SVP

O–B–O angle = 112.0°

B–O bond: 1.37133 Å, 1.37170 Å

H = -450.427582 (hartree)

AA = 28.8 (kJ/mol)

|   |            |            |             |
|---|------------|------------|-------------|
| B | 1.56737900 | 0.01513700 | -0.01927000 |
|---|------------|------------|-------------|



|   |             |             |             |
|---|-------------|-------------|-------------|
| O | 0.79563300  | 1.06824100  | 0.40015700  |
| C | -0.56902000 | 0.77963900  | 0.05668500  |
| C | -0.55641500 | -0.78415500 | -0.05492900 |
| O | 0.80459900  | -1.04807700 | -0.43071900 |
| C | -0.79141300 | -1.47103300 | 1.28849500  |
| C | -1.48813400 | -1.35521300 | -1.11046000 |
| C | -0.84809600 | 1.46219500  | -1.28043100 |
| C | -1.48577700 | 1.33392600  | 1.13414500  |
| H | -0.13518500 | -1.04923800 | 2.06333800  |
| H | -1.83485300 | -1.37048000 | 1.61794500  |
| H | -0.55569100 | -2.53865700 | 1.18287700  |
| H | -1.41024200 | -2.45109700 | -1.11267900 |
| H | -2.53176400 | -1.08281300 | -0.89367900 |
| H | -1.22586400 | -0.99276500 | -2.11156500 |
| H | -0.20313500 | 1.05208300  | -2.07074200 |
| H | -1.89730800 | 1.34337200  | -1.58458000 |
| H | -0.62868700 | 2.53378300  | -1.17996300 |
| H | -2.52911800 | 1.04247200  | 0.94217100  |
| H | -1.19334700 | 0.97688600  | 2.12882300  |
| H | -1.42792100 | 2.43105100  | 1.13454300  |
| C | 3.13305300  | 0.01223500  | -0.00502500 |
| H | 3.48658200  | -0.36976700 | 0.96577700  |
| H | 3.53831100  | -0.64956900 | -0.78188600 |
| H | 3.54429400  | 1.02219100  | -0.13042100 |

### MeB(pin)-NH<sub>3</sub>

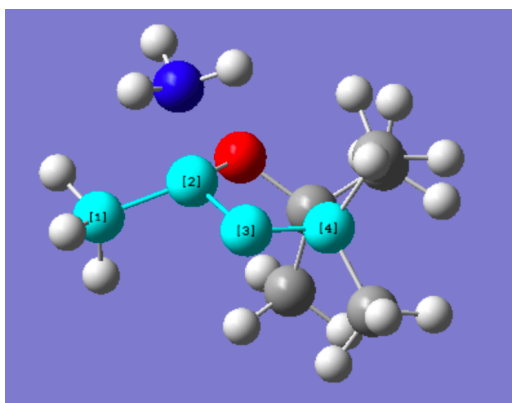

Charge = 0; Multiplicity = 1

M06-2X/def2-SVP

Dihedral angle = 142.9°

B-N bond: 1.44503 Å, 1.43778 Å

H = -506.873520 (hartree)

|   |             |             |             |
|---|-------------|-------------|-------------|
| B | 1.37856400  | 0.12428500  | 0.08878400  |
| O | 0.52552300  | 0.69348100  | -0.92927800 |
| C | -0.80621900 | 0.64833900  | -0.44481900 |
| C | -0.78444600 | -0.62915800 | 0.46220700  |
| O | 0.52867400  | -0.59816100 | 0.99595400  |
| C | -1.78693800 | -0.61540000 | 1.60777600  |
| C | -0.97342400 | -1.91085000 | -0.35964300 |
| C | -1.77248300 | 0.58042400  | -1.61891300 |
| C | -1.07444100 | 1.91464800  | 0.37309800  |
| H | -1.57047700 | 0.20580100  | 2.30146500  |
| H | -2.81638400 | -0.50865100 | 1.23300900  |
| H | -1.71864400 | -1.55882200 | 2.16849600  |
| H | -0.65295900 | -2.76917900 | 0.24891900  |
| H | -2.02320200 | -2.06150800 | -0.64988500 |
| H | -0.38181300 | -1.88343700 | -1.28783300 |
| H | -1.50968200 | -0.23366300 | -2.30622500 |
| H | -2.80620500 | 0.43340100  | -1.27065100 |
| H | -1.72988500 | 1.52360300  | -2.18187500 |
| H | -2.12462300 | 1.98530300  | 0.69146400  |
| H | -0.43302200 | 1.93962200  | 1.26534800  |
| H | -0.83360700 | 2.78728200  | -0.24991900 |
| H | 2.61300000  | -0.64900600 | -1.64836800 |
| H | 3.04156600  | -1.43381900 | -0.24334800 |
| H | 1.63086400  | -1.83375500 | -1.02252100 |
| N | 2.25988400  | -1.06595200 | -0.78600600 |
| C | 2.50506000  | 1.05223300  | 0.75883100  |
| H | 3.10344100  | 0.51110200  | 1.51063800  |
| H | 3.19683700  | 1.48556800  | 0.01721000  |
| H | 2.02656600  | 1.89642000  | 1.27756800  |

### 3. Stability test of PhB(mdan) towards hydrolysis

We conducted the stability test of PhB(mdan) towards hydrolysis according to Krempner's procedure.<sup>1</sup> A standard NMR tube was charged with PhB(mdan) (0.0082 g, 0.03 mmol) and 0.6 mL of a DMSO-D<sub>6</sub>/water mixture (10 vol% H<sub>2</sub>O). The progress of the hydrolysis was monitored periodically by <sup>1</sup>H NMR spectroscopy, and we confirmed that PhB(mdan) did not decompose after 24 days.

## 4. Reference

1. C. P. Manankandayalage, D. K. Unruh and C. Krempner, *Dalton Trans.*, 2020, **49**, 4834–4842.
